# Supplementary material
Source: MDPI journal article supplement (https://www.mdpi.com/2071-1050/10/9/3280)
Supplement: s1 [file s1]

## Supplementary Materials

### Index

[Supplement 1 Articles included in analysis \(n=390\)](#)

PG. 2

[Supplement 2 Articles excluded from analysis \(n=962\)](#)

PG. 26

### Supplement 1: Articles included in analysis (n=390)

- Abel, N., R. Gorddard, B. Harman, A. Leitch, J. Langridge, A. Ryan, and S. Heyenga. "Sea Level Rise, Coastal Development and Planned Retreat: Analytical Framework, Governance Principles and an Australian Case Study." [In English]. *Environmental Science and Policy* 14, no. 3 (2011): 279-88.
- Abel, N., R. M. Wise, M. J. Colloff, B. H. Walker, J. R. A. Butler, P. Ryan, C. Norman, *et al.* "Building Resilient Pathways to Transformation When "No One Is in Charge": Insights from Australia's Murray-Darling Basin." *Ecology and Society* 21, no. 2 (2016).
- Abuodha, P. A. O., and C. D. Woodroffe. "Assessing Vulnerability to Sea-Level Rise Using a Coastal Sensitivity Index: A Case Study from Southeast Australia." [In English]. *Journal of Coastal Conservation* 14, no. 3 (2010): 189-205.
- Adams, V. M., J. G. Álvarez-Romero, S. J. Capon, G. M. Crowley, A. P. Dale, M. J. Kennard, M. M. Douglas, and R. L. Pressey. "Making Time for Space: The Critical Role of Spatial Planning in Adapting Natural Resource Management to Climate Change." *Environmental Science and Policy* 74 (2017): 57-67.
- Adamson, D., T. Mallawaarachchi, and J. Quiggin. "Declining Inflows and More Frequent Droughts in the Murray - Darling Basin: Climate Change, Impacts and Adaptation." [In English]. *Australian Journal of Agricultural and Resource Economics* 53, no. 3 (2009): 345-66.
- Akompab, D. A., P. Bi, S. Williams, J. Grant, I. A. Walker, and M. Augoustinos. "Heat Waves and Climate Change: Applying the Health Belief Model to Identify Predictors of Risk Perception and Adaptive Behaviours in Adelaide, Australia." [In English]. *International Journal of Environmental Research and Public Health* 10, no. 6 (2013): 2164-84.
- Aldous, A., J. Fitzsimons, B. Richter, and L. Bach. "Droughts, Floods and Freshwater Ecosystems: Evaluating Climate Change Impacts and Developing Adaptation Strategies." [In English]. *Marine and Freshwater Research* 62, no. 3 (2011): 223-31.
- Aldum, N., J. Duggie, and B. J. Robson. "Climate Change Adaptation Support Tools in Australia." [In English]. *Regional Environmental Change* 14, no. 1 (2014): 401-11.
- Alexandra, J. "Australia's Landscapes in a Changing Climate: Caution, Hope, Inspiration, and Transformation." [In English]. *Crop and Pasture Science* 63, no. 3 (2012): 215-31.
- Alsaqqaf, Z., H. Zhang, and S. Mohamed. "Risk-Based Assessment of Climate Change Impact on Storm Drainage System." [In English]. *2nd International Conference on Flood Recovery, Innovation and Response, FRIAR 2010* 133 (2010): 13-24.
- Alston, M. "Gender and Climate Change in Australia." [In English]. *Journal of Sociology* 47, no. 1 (2011): 53-70.
- . "Gender and Climate Change in Australia and the Pacific." Chap. Chapter 13 In *Research, Action and Policy: Addressing the Gendered Impacts of Climate Change*, 175-88, 2013.
- Alston, M., J. Clarke, and K. Whittenbury. "Limits to Adaptation: Reducing Irrigation Water in the Murray-Darling Basin Dairy Communities." *Journal of Rural Studies* 58 (2018): 93-102.
- Alston, M., and K. Whittenbury. "Climate Change and Water Policy in Australia's Irrigation Areas: A Lost Opportunity for a Partnership Model of Governance." [In English]. *Environmental Politics* 20, no. 6 (2011): 899-917.
- Ambrey, C., J. Byrne, T. Matthews, A. Davison, C. Portanger, and A. Lo. "Cultivating Climate Justice: Green Infrastructure and Suburban Disadvantage in Australia." *Applied Geography* 89 (2017): 52-60.
- Amelung, B., and S. Nicholls. "Implications of Climate Change for Tourism in Australia." *Tourism Management* 41 (2014): 228-44.

- Anderson, D. "Enduring Drought Then Coping with Climate Change: Lived Experience and Local Resolve in Rural Mental Health." [In English]. *Rural Society* 19, no. 4 (2009): 340-52.
- Appleby, K., K. Bell, and H. Boetto. "Climate Change Adaptation: Community Action, Disadvantaged Groups and Practice Implications for Social Work." *Australian Social Work* 70, no. 1 (2017): 78-91.
- Asseng, S., A. Dray, P. Perez, and X. Su. "Rainfall-Human-Spatial Interactions in a Salinity-Prone Agricultural Region of the Western Australian Wheat-Belt." [In English]. *Ecological Modelling* 221, no. 5 (2010): 812-24.
- Baldwin, C., and L. Chandler. "'At the Water's Edge': Community Voices on Climate Change." [In English]. *Local Environment* 15, no. 7 (2010): 637-49.
- Bambrick, H. J., A. G. Capon, G. B. Barnett, R. M. Beaty, and A. J. Burton. "Climate Change and Health in the Urban Environment: Adaptation Opportunities in Australian Cities." [In English]. *Asia-Pacific Journal of Public Health* 23, no. 2 SUPPL. (2011): 67S-79S.
- Banwell, C., J. Dixon, H. Bambrick, F. Edwards, and T. Kjellström. "Socio-Cultural Reflections on Heat in Australia with Implications for Health and Climate Change Adaptation." [In English]. *Global Health Action* 5, no. 1 (2012).
- Bardsley, D. K.. "Navigating the Roles of the Social Learning Researcher: A Critical Analysis of a Learning Approach to Guide Climate Change Adaptation." *Australian Geographer* 46, no. 1 (2015): 33-50.
- Bardsley, D. K., and A. M. Bardsley. "A Constructivist Approach to Climate Change Teaching and Learning." [In English]. *Geographical Research* 45, no. 4 (2007): 329-39.
- Bardsley, D. K., and G. P. Rogers. "Prioritizing Engagement for Sustainable Adaptation to Climate Change: An Example from Natural Resource Management in South Australia." [In English]. *Society and Natural Resources* 24, no. 1 (2011): 1-17.
- Bardsley, D. K., and S. M. Sweeney. "Guiding Climate Change Adaptation within Vulnerable Natural Resource Management Systems." [In English]. *Environmental Management* 45, no. 5 (2010): 1127-41.
- Bardsley, D. K., and N. D. Wiseman. "Climate Change Vulnerability and Social Development for Remote Indigenous Communities of South Australia." [In English]. *Global Environmental Change* 22, no. 3 (2012): 713-23.
- . "Socio-Ecological Lessons for the Anthropocene: Learning from the Remote Indigenous Communities of Central Australia." *Anthropocene* 14 (2016): 58-70.
- Barnett, J., L. S. Evans, C. Gross, A. S. Kiem, R. T. Kingsford, J. P. Palutikof, C. M. Pickering, and S. G. Smithers. "From Barriers to Limits to Climate Change Adaptation: Path Dependency and the Speed of Change." *Ecology and Society* 20, no. 3 (2015).
- Beebe, N. W., R. D. Cooper, P. Mottram, and A. W. Sweeney. "Australia's Dengue Risk Driven by Human Adaptation to Climate Change." [In English]. *PLoS Negl Trop Dis* 3, no. 5 (2009): e429.
- Bekesi, G., M. McGuire, and D. Moiler. "Groundwater Allocation Using a Groundwater Level Response Management Method - Gngangara Groundwater System, Western Australia." [In English]. *Water Resources Management* 23, no. 9 (2009): 1665-83.
- Bell, L. W., R. G. Bennett, M. H. Ryan, and H. Clarke. "The Potential of Herbaceous Native Australian Legumes as Grain Crops: A Review." [In English]. *Renewable Agriculture and Food Systems* 26, no. 1 (2011): 72-91.
- Bennett, M., and A. Gardner. "Regulating Groundwater in a Drying Climate: Lessons from South West Australia." *Journal of Energy and Natural Resources Law* 33, no. 4 (2015): 293-319.
- Bennett, R. G., M. H. Ryan, T. D. Colmer, and D. Real. "Prioritisation of Novel Pasture Species for Use

- in Water-Limited Agriculture: A Case Study of Cullen in the Western Australian Wheatbelt." [In English]. *Genetic Resources and Crop Evolution* 58, no. 1 (2011): 83-100.
- Berry, H. L., J. R. A. Butler, C. P. Burgess, U. G. King, K. Tsey, Y. L. Cadet-James, C. W. Rigby, and B. Raphael. "Mind, Body, Spirit: Co-Benefits for Mental Health from Climate Change Adaptation and Caring for Country in Remote Aboriginal Australian Communities." [In English]. *New South Wales Public Health Bulletin* 21, no. 5-6 (2010): 139-45.
- Berry, H. L., A. Hogan, S. P. Ng, and A. Parkinson. "Farmer Health and Adaptive Capacity in the Face of Climate Change and Variability. Part 1: Health as a Contributor to Adaptive Capacity and as an Outcome from Pressures Coping with Climate Related Adversities." [In English]. *International Journal of Environmental Research and Public Health* 8, no. 10 (2011): 4039-54.
- Berry, H. L., A. Hogan, J. Owen, D. Rickwood, and L. Fragar. "Climate Change and Farmers' Mental Health: Risks and Responses." [In English]. *Asia-Pacific Journal of Public Health* 23, no. 2 SUPPL. (2011): 119S-32S.
- Bettington, S. H., J. Rainbird, P. V. McGuire, and S. Snelling. "Adaptation to Coastal Erosion and Marine Inundation on Torres Strait Islands." Paper presented at the Coasts and Ports 2013, Sydney, NSW, 2013.
- Bicknell, S., and P. McManus. "The Canary in the Coalmine: Australian Ski Resorts and Their Response to Climate Change." [In English]. *Geographical Research* 44, no. 4 (2006): 386-400.
- Bishop, I. D., C. J. Pettit, C. Stock, and V. Sposito. "Model Driven Visualisation of Climate Change Scenarios." Paper presented at the 18th World IMACS Congress and International Congress on Modelling and Simulation: Interfacing Modelling and Simulation with Mathematical and Computational Sciences, MODSIM09, Cairns, QLD, 2009.
- Blashki, G., G. Armstrong, H. L. Berry, H. J. Weaver, E. G. Hanna, P. Bi, D. Harley, and J. T. Spickett. "Preparing Health Services for Climate Change in Australia." [In English]. *Asia-Pacific Journal of Public Health* 23, no. 2 SUPPL. (2011): 133S-43S.
- Boer, H. "Policy Options for, and Constraints on, Effective Adaptation for Rivers and Wetlands in Northeast Queensland." [In English]. *Australasian Journal of Environmental Management* 17, no. 3 (2010): 154-64.
- Boon, H. J. "Perceptions of Climate Change Risk in Four Disaster-Impacted Rural Australian Towns." [In English]. *Regional Environmental Change* 16, no. 1 (2014): 137-49.
- . "Climate Change Ignorance: An Unacceptable Legacy." *Australian Educational Researcher* 42, no. 4 (2015): 405-27.
- Booth, T. H. "Eucalypt Plantations and Climate Change." [In English]. *Forest Ecology and Management* 301 (2013): 28-34.
- Bosomworth, K., C. Owen, and S. Curnin. "Addressing Challenges for Future Strategic-Level Emergency Management: Reframing, Networking, and Capacity-Building." *Disasters* 41, no. 2 (Apr 2017): 306-23.
- Bowering, E. "Adapting to Climate-Induced Sea Level Rise on the Gold Coast: Lessons from the Netherlands." [In English]. *Australian Planner* 51, no. 4 (2014): 340-48.
- Bowles, D. C. "Climate Change and Health Adaptation: Consequences for Indigenous Physical and Mental Health." *Annals of Global Health* 81, no. 3 (May-Jun 2015): 427-31.
- Bradley, G. L., and J. P. Reser. "Adaptation Processes in the Context of Climate Change: A Social and Environmental Psychology Perspective." *Journal of Bioeconomics* 19, no. 1 (2017): 29-51.
- Bradley, M., I. van Putten, and M. Sheaves. "The Pace and Progress of Adaptation: Marine Climate Change Preparedness in Australia's Coastal Communities." *Marine Policy* 53 (2015): 13-20.
- Bremer, J., and M. K. Linnenluecke. "Determinants of the Perceived Importance of Organisational

- Adaptation to Climate Change in the Australian Energy Industry." *Australian Journal of Management* 42, no. 3 (2017): 502-21.
- Brown, H., J. Spickett, and D. Katscherian. "A Health Impact Assessment Framework for Assessing Vulnerability and Adaptation Planning for Climate Change." [In English]. *International Journal of Environmental Research and Public Health* 11, no. 12 (Dec 2014): 12896-914.
- Brown, P. R., K. L. Bridle, and S. J. Crimp. "Assessing the Capacity of Australian Broadacre Mixed Farmers to Adapt to Climate Change: Identifying Constraints and Opportunities." *Agricultural Systems* 146 (2016): 129-41.
- Bryan, B. A., J. Huai, J. Connor, L. Gao, D. King, J. Kandulu, and G. Zhao. "What Actually Confers Adaptive Capacity? Insights from Agro-Climatic Vulnerability of Australian Wheat." *PLoS ONE* 10, no. 2 (2015): e0117600.
- Bryan, B. A., M. Nolan, L. McKellar, J. D. Connor, D. Newth, T. Harwood, D. King, *et al.* "Land-Use and Sustainability under Intersecting Global Change and Domestic Policy Scenarios: Trajectories for Australia to 2050." *Global Environmental Change* 38 (2016): 130-52.
- Burbidge, A. A., M. Byrne, D. Coates, S. T. Garnett, S. Harris, M. W. Hayward, T. G. Martin, *et al.* "Is Australia Ready for Assisted Colonization? Policy Changes Required to Facilitate Translocations under Climate Change." [In English]. *Pacific Conservation Biology* 17, no. 3 (2011): 259-69.
- Burley, J. G., R. R. J. McAllister, K. A. Collins, and C. E. Lovelock. "Integration, Synthesis and Climate Change Adaptation: A Narrative Based on Coastal Wetlands at the Regional Scale." [In English]. *Regional Environmental Change* 12, no. 3 (2012): 581-93.
- Burton, A., H. Bambrick, and S. Friel. "If You Don't Know How Can You Plan? Considering the Health Impacts of Climate Change in Urban Planning in Australia." *Urban Climate* 12 (2015): 104-18.
- Bussey, M., R. W. Carter, N. Keys, J. Carter, R. Mangoyana, J. Matthews, D. Nash, *et al.* "Framing Adaptive Capacity through a History-Futures Lens: Lessons from the South East Queensland Climate Adaptation Research Initiative." [In English]. *Futures* 44, no. 4 (2012): 385-97.
- Buys, L., E. Miller, and K. van Megen. "Conceptualising Climate Change in Rural Australia: Community Perceptions, Attitudes and (in)Actions." [In English]. *Regional Environmental Change* 12, no. 1 (2012): 237-48.
- Byrne, J., C. Ambrey, C. Portanger, A. Lo, T. Matthews, D. Baker, and A. Davison. "Could Urban Greening Mitigate Suburban Thermal Inequity?: The Role of Residents' Dispositions and Household Practices." *Environmental Research Letters* 11, no. 9 (2016).
- Cammarano, D., J. Payero, B. Basso, L. Stefanova, and P. Grace. "Adapting Wheat Sowing Dates to Projected Climate Change in the Australian Subtropics: Analysis of Crop Water Use and Yield." [In English]. *Crop and Pasture Science* 63, no. 10 (2012): 974-86.
- Carmichael, B., G. Wilson, I. Namarnyilk, S. Nadji, J. Cahill, and D. Bird. "Testing the Scoping Phase of a Bottom-up Planning Guide Designed to Support Australian Indigenous Rangers Manage the Impacts of Climate Change on Cultural Heritage Sites." *Local Environment* 22, no. 10 (2017): 1197-216.
- Carthey, J., V. Chandra, and M. Loosemore. "Assessing the Adaptive Capacity of Hospital Facilities to Cope with Climate-Related Extreme Weather Events: A Risk Management Approach." Paper presented at the 24th Annual Conference of the Association of Researchers in Construction Management, ARCOM 2008, Cardiff, 2008.
- . "Adapting Australian Health Facilities to Cope with Climate-Related Extreme Weather Events." *Journal of Facilities Management* 7, no. 1 (2009): 36-51.
- Chapman, D. F., K. Dassanayake, J. O. Hill, B. R. Cullen, and N. Lane. "Forage-Based Dairying in a Water-Limited Future: Use of Models to Investigate Farming System Adaptation in Southern

- Australia." [In English]. *Journal of Dairy Science* 95, no. 7 (2012): 4153-75.
- Chapman, S., J. E. M. Watson, and C. A. McAlpine. "Large Seasonal and Diurnal Anthropogenic Heat Flux across Four Australian Cities." *Journal of Southern Hemisphere Earth Systems Science* 66, no. 3 (2016): 342-60.
- Chen, D., Z. Ren, C. H. Wang, M. Thatcher, and X. Wang. "Urban Heat Island on Australian Housing Energy Consumption." Paper presented at the 10th International Conference on Healthy Buildings 2012, 2012.
- Chen, Y., R. Liu, D. Barrett, L. Gao, M. Zhou, L. Renzullo, and I. Emelyanova. "A Spatial Assessment Framework for Evaluating Flood Risk under Extreme Climates." *Science of the Total Environment* 538 (Dec 15 2015): 512-23.
- Cobon, D. H., G. S. Stone, J. O. Carter, J. C. Scanlan, N. R. Toombs, X. Zhang, J. Willcocks, and G. M. McKeon. "The Climate Change Risk Management Matrix for the Grazing Industry of Northern Australia." [In English]. *Rangeland Journal* 31, no. 1 (2009): 31-49.
- Cobon, D. H., A. A. J. Williams, B. Power, D. McRae, and P. Davis. "Risk Matrix Approach Useful in Adapting Agriculture to Climate Change." *Climatic Change* 138, no. 1-2 (2016): 173-89.
- Cocolas, N., G. Walters, and L. Ruhanen. "Behavioural Adaptation to Climate Change among Winter Alpine Tourists: An Analysis of Tourist Motivations and Leisure Substitutability." *Journal of Sustainable Tourism* 24, no. 6 (2016): 846-65.
- Colloff, M. J., S. Lavorel, R. M. Wise, M. Dunlop, I. C. Overton, and K. J. Williams. "Adaptation Services of Floodplains and Wetlands under Transformational Climate Change." *Ecological Applications* 26, no. 4 (Jun 2016): 1003-17.
- Conejos, S., C. Langston, E. H. W. Chan, and M. Y. L. Chew. "Governance of Heritage Buildings: Australian Regulatory Barriers to Adaptive Reuse." *Building Research and Information* 44, no. 5-6 (2016): 507-19.
- Connor, J., K. Schwabe, D. King, D. Kaczan, and M. Kirby. "Impacts of Climate Change on Lower Murray Irrigation." [In English]. *Australian Journal of Agricultural and Resource Economics* 53, no. 3 (2009): 437-56.
- Connor, J. D., K. Schwabe, D. King, and K. Knapp. "Irrigated Agriculture and Climate Change: The Influence of Water Supply Variability and Salinity on Adaptation." [In English]. *Ecological Economics* 77 (2012): 149-57.
- Connor, T., R. Niall, P. Cummings, and M. Papillo. "Incorporating Climate Change Adaptation into Engineering Design Concepts and Solutions." [In English]. *Australian Journal of Structural Engineering* 14, no. 2 (2013): 125-34.
- Cook, S., A. Sharma, and M. Chong. "Performance Analysis of a Communal Residential Rainwater System for Potable Supply: A Case Study in Brisbane, Australia." [In English]. *Water Resources Management* 27, no. 14 (2013): 4865-76.
- Cooper, J. A. G., and C. Lemckert. "Extreme Sea-Level Rise and Adaptation Options for Coastal Resort Cities: A Qualitative Assessment from the Gold Coast, Australia." [In English]. *Ocean and Coastal Management* 64 (2012): 1-14.
- Cox, S. "Securing Our Water Future for the Gold Coast." [In English]. *8th Annual Water Distribution Systems Analysis Symposium 2006* (2007): 1.
- Creighton, C., A. J. Hobday, M. Lockwood, and G. T. Pecl. "Adapting Management of Marine Environments to a Changing Climate: A Checklist to Guide Reform and Assess Progress." *Ecosystems* 19, no. 2 (2016): 187-219.
- Cullen, B. R., I. R. Johnson, R. J. Eckard, G. M. Lodge, R. G. Walker, R. P. Rawnsley, and M. R. McCaskill. "Climate Change Effects on Pasture Systems in South-Eastern Australia." [In

- English]. *Crop and Pasture Science* 60, no. 10 (2009): 933-42.
- Cunningham, R., C. Cvitanovic, T. Measham, B. Jacobs, A. M. Dowd, and B. Harman. "Engaging Communities in Climate Adaptation: The Potential of Social Networks." *Climate Policy* 16, no. 7 (2016): 894-908.
- Darbyshire, R., L. McClymont, and I. Goodwin. "Sun Damage Risk of Royal Gala Apple in Fruit-Growing Districts in Australia." *New Zealand Journal of Crop and Horticultural Science* 43, no. 3 (2015): 222-32.
- Darbyshire, R., P. Measham, and I. Goodwin. "A Crop and Cultivar-Specific Approach to Assess Future Winter Chill Risk for Fruit and Nut Trees." *Climatic Change* 137, no. 3-4 (2016): 541-56.
- Davidson, J. L., I. E. van Putten, P. Leith, M. Nursey-Bray, E. M. Madin, and N. J. Holbrook. "Toward Operationalizing Resilience Concepts in Australian Marine Sectors Coping with Climate Change." [In English]. *Ecology and Society* 18, no. 3 (2013).
- De Vet, E. "Experiencing and Responding to Everyday Weather in Darwin, Australia: The Important Role of Tolerance." *Weather, Climate, and Society* 9, no. 2 (2017): 141-54.
- Dedekorkut, A., J. Mustelin, M. Howes, and J. Byrne. "Tempering Growth: Planning for the Challenges of Climate Change and Growth Management in Seq." [In English]. *Australian Planner* 47, no. 3 (2010): 203-15.
- Dillon, P. "Water Security for Adelaide, South Australia." Chap. 24 In *Water Resources Planning and Management*, 505-26, 2011.
- Dowd, A. M., N. Marshall, A. Fleming, E. Jakku, E. Gaillard, and M. Howden. "The Role of Networks in Transforming Australian Agriculture." [In English]. *Nature Climate Change* 4, no. 7 (2014): 558-63.
- Dutra, L. X. C., R. H. Bustamante, I. Sporne, I. van Putten, C. M. Dichmont, E. Ligtermoet, M. Sheaves, and R. A. Deng. "Organizational Drivers That Strengthen Adaptive Capacity in the Coastal Zone of Australia." *Ocean and Coastal Management* 109 (2015): 64-76.
- Dutta, D., W. Wright, and P. Rayment. "Synthetic Impact Response Functions for Flood Vulnerability Analysis and Adaptation Measures in Coastal Zones under Changing Climatic Conditions: A Case Study in Gippsland Coastal Region, Australia." [In English]. *Natural Hazards* 59, no. 2 (2011): 967-86.
- Elgin-Stuczynski, I. R., and S. Batterbury. "Perceptions of Climate Variability and Dairy Farmer Adaptations in Corangamite Shire, Victoria, Australia." [In English]. *International Journal of Climate Change Strategies and Management* 6, no. 1 (2014): 85-107.
- Elrick-Barr, C. E., T. F. Smith, B. L. Preston, D. C. Thomsen, and S. Baum. "How Are Coastal Households Responding to Climate Change?". *Environmental Science and Policy* 63 (2016): 177-86.
- Elrick-Barr, C. E., T. F. Smith, D. C. Thomsen, and B. L. Preston. "Perceptions of Risk among Households in Two Australian Coastal Communities." *Geographical Research* 53, no. 2 (2015): 145-59.
- Espada, R., A. Apan, and K. McDougall. "Vulnerability Assessment of Urban Community and Critical Infrastructures for Integrated Flood Risk Management and Climate Adaptation Strategies." *International Journal of Disaster Resilience in the Built Environment* 8, no. 4 (2017): 375-411.
- Espada, R. J., A. Apan, and K. McDougall. "Vulnerability Assessment and Interdependency Analysis of Critical Infrastructures for Climate Adaptation and Flood Mitigation." *International Journal of Disaster Resilience in the Built Environment* 6, no. 3 (2015): 313-46.
- Evans, C., D. Tsolakakis, and C. Naudé. "Framework to Address the Climate Change Impacts on Road Infrastructure Assets and Operations." Paper presented at the 32nd Australasian Transport

- Research Forum, ATRF 2009, Auckland, 2009.
- Ferguson, B. C., R. R. Brown, and A. Deletic. "A Diagnostic Procedure for Transformative Change Based on Transitions, Resilience, and Institutional Thinking." *Ecology and Society* 18, no. 4 (2013).
- Fidelman, P. I. J., A. M. Leitch, and D. R. Nelson. "Unpacking Multilevel Adaptation to Climate Change in the Great Barrier Reef, Australia." [In English]. *Global Environmental Change* 23, no. 4 (2013): 800-12.
- Fincher, R., J. Barnett, and S. Graham. "Temporalities in Adaptation to Sea-Level Rise." *Annals of the Association of American Geographers* 105, no. 2 (2015): 263-73.
- Fincher, R., J. Barnett, S. Graham, and A. Hurlimann. "Time Stories: Making Sense of Futures in Anticipation of Sea-Level Rise." [In English]. *Geoforum* 56 (2014): 201-10.
- Firn, J., R. Maggini, I. Chadès, S. Nicol, B. Walters, A. Reeson, T. G. Martin, *et al.* "Priority Threat Management of Invasive Animals to Protect Biodiversity under Climate Change." *Global Change Biology* 21, no. 11 (Nov 2015): 3917-30.
- Fleming, A., A. J. Hobday, A. Farmery, E. I. van Putten, G. T. Pecl, B. S. Green, and L. Lim-Camacho. "Climate Change Risks and Adaptation Options across Australian Seafood Supply Chains - a Preliminary Assessment." [In English]. *Climate Risk Management* 1 (2014): 39-50.
- Fleming, A., S. E. Park, and N. A. Marshall. "Enhancing Adaptation Outcomes for Transformation: Climate Change in the Australian Wine Industry." *Journal of Wine Research* 26, no. 2 (2015): 99-114.
- Fleming, A., L. Rickards, and A. M. Dowd. "Understanding Convergence and Divergence in the Framing of Climate Change Responses: An Analysis of Two Wine Companies." *Environmental Science and Policy* 51 (2015): 202-14.
- Fleming, A., and F. Vanclay. "Farmer Responses to Climate Change and Sustainable Agriculture." In *Sustainable Agriculture*, 283-93: Springer Netherlands, 2009.
- . "Farmer Responses to Climate Change and Sustainable Agriculture. A Review." [In English]. *Agronomy for Sustainable Development* 30, no. 1 (2010): 11-19.
- Foerster, A., A. Macintosh, and J. McDonald. "Trade-Offs in Adaptation Planning: Protecting Public Interest Environmental Values." *Journal of Environmental Law* 27, no. 3 (2015): 459-87.
- Fordham, D. A., M. J. Watts, S. Delean, B. W. Brook, L. M. Heard, and C. M. Bull. "Managed Relocation as an Adaptation Strategy for Mitigating Climate Change Threats to the Persistence of an Endangered Lizard." [In English]. *Global Change Biology* 18, no. 9 (2012): 2743-55.
- Friel, S., H. Berry, H. Dinh, L. O'Brien, and H. L. Walls. "The Impact of Drought on the Association between Food Security and Mental Health in a Nationally Representative Australian Sample." *BMC Public Health* 14, no. 1 (Oct 24 2014): 1102.
- Frusher, S., I. van Putten, M. Haward, A. J. Hobday, N. J. Holbrook, S. Jennings, N. Marshall, *et al.* "From Physics to Fish to Folk: Supporting Coastal Regional Communities to Understand Their Vulnerability to Climate Change in Australia." *Fisheries Oceanography* 25 (2016): 19-28.
- Frusher, S. D., A. J. Hobday, S. M. Jennings, C. Creighton, D. D'Silva, M. Haward, N. J. Holbrook, *et al.* "The Short History of Research in a Marine Climate Change Hotspot: From Anecdote to Adaptation in South-East Australia." [In English]. *Reviews in Fish Biology and Fisheries* 24, no. 2 (2014): 593-611.
- Fuentes, M. M. P. B., L. Chambers, A. Chin, P. Dann, K. Dobbs, H. Marsh, E. S. Poloczanska, *et al.* "Adaptive Management of Marine Mega-Fauna in a Changing Climate." [In English]. *Mitigation and Adaptation Strategies for Global Change* 21, no. 2 (2014): 209-24.
- Fünfgeld, H., and D. McEvoy. "Frame Divergence in Climate Change Adaptation Policy: Insights from



- Australian Local Government Planning." [In English]. *Environment and Planning C: Government and Policy* 32, no. 4 (2014): 603-22.
- Galbreath, J. "To What Extent Is Business Responding to Climate Change? Evidence from a Global Wine Producer." [In English]. *Journal of Business Ethics* 104, no. 3 (2011): 421-32.
- . "Climate Change Response: Evidence from the Margaret River Wine Region of Australia." [In English]. *Business Strategy and the Environment* 23, no. 2 (2014): 89-104.
- . "To Cooperate or Compete? Looking at the Climate Change Issue in the Wine Industry." *International Journal of Wine Business Research* 27, no. 3 (2015): 220-30.
- Galbreath, J., D. Charles, and E. Oczkowski. "The Drivers of Climate Change Innovations: Evidence from the Australian Wine Industry." [In English]. *Journal of Business Ethics* 135, no. 2 (2014): 217-31.
- Ghahramani, A., P. N. Kokic, A. D. Moore, B. Zheng, S. C. Chapman, M. S. Howden, and S. J. Crimp. "The Value of Adapting to Climate Change in Australian Wheat Farm Systems: Farm to Cross-Regional Scale." *Agriculture, Ecosystems and Environment* 211 (2015): 112-25.
- Ghahramani, A., and A. D. Moore. "Climate Change and Broadacre Livestock Production across Southern Australia. 2. Adaptation Options Via Grassland Management." [In English]. *Crop and Pasture Science* 64, no. 6 (2013): 615-30.
- . "Systemic Adaptations to Climate Change in Southern Australian Grasslands and Livestock: Production, Profitability, Methane Emission and Ecosystem Function." *Agricultural Systems* 133 (2015): 158-66.
- . "Impact of Climate Changes on Existing Crop-Livestock Farming Systems." *Agricultural Systems* 146 (2016): 142-55.
- Goater, S., A. Cook, A. Hogan, K. Mengersen, A. Hieatt, and P. Weinstein. "Strategies to Strengthen Public Health Inputs to Water Policy in Response to Climate Change: An Australian Perspective." [In English]. *Asia-Pacific Journal of Public Health* 23, no. 2 SUPPL. (2011): 80S-90S.
- Gordon, A. D. "Disposable Infrastructure Including Relocatable Buildings: Adapting to Climate Change." [In English]. *Australian Journal of Water Resources* 17, no. 2 (2013): 152-60.
- Govind, P. "Managing the Relationship between Adaptation and Coastal Land Use Development through the Use of S 149 Certificates." [In English]. *Macquarie Journal of International and Comparative Environmental Law* 7, no. 1 (2011): 94-107.
- Graham, S., J. Barnett, R. Fincher, A. Hurlimann, and C. Mortreux. "Local Values for Fairer Adaptation to Sea-Level Rise: A Typology of Residents and Their Lived Values in Lakes Entrance, Australia." [In English]. *Global Environmental Change* 29 (2014): 41-52.
- Graham, Sonia, Jon Barnett, Ruth Fincher, Colette Mortreux, and Anna Hurlimann. "Towards Fair Local Outcomes in Adaptation to Sea-Level Rise." [In English]. *Climatic Change* 130, no. 3 (2014): 411-24.
- Grant, S. B., T. D. Fletcher, D. Feldman, J. D. Saphores, P. L. M. Cook, M. Stewardson, K. Low, K. Burry, and A. J. Hamilton. "Adapting Urban Water Systems to a Changing Climate: Lessons from the Millennium Drought in Southeast Australia." [In English]. *Environmental Science and Technology* 47, no. 19 (2013): 10727-34.
- Green, D., L. Alexander, K. McLnnes, J. Church, N. Nicholls, and N. White. "An Assessment of Climate Change Impacts and Adaptation for the Torres Strait Islands, Australia." [In English]. *Climatic Change* 102, no. 3 (2010): 405-33.
- Green, D., J. Billy, and A. Tapim. "Indigenous Australians' Knowledge of Weather and Climate." [In English]. *Climatic Change* 100, no. 2 (2010): 337-54.

- Green, D., S. Niall, and J. Morrison. "Bridging the Gap between Theory and Practice in Climate Change Vulnerability Assessments for Remote Indigenous Communities in Northern Australia." [In English]. *Local Environment* 17, no. 3 (2012): 295-315.
- Green, D., A. Pitman, A. Barnett, J. Kaldor, P. Doherty, and F. Stanley. "Advancing Australia's Role in Climate Change and Health Research." *Nature Climate Change* 7, no. 2 (2017): 103-06.
- Guilding, C., D. Lamminmaki, and J. Warnken. "Preparing Strata Titled Communities for Climate Change: An Empirical Examination." *Property Management* 33, no. 4 (2015): 308-29.
- Gunasekera, D., M. Ford, and C. Tulloh. "Climate Change: Issues and Challenges for Australian Agriculture and Forestry." *Australian Commodities* 14, no. 3 (2007): 493-515.
- Gunasekera, D., Y. Kim, C. Tulloh, and M. Ford. "Climate Change: Impacts on Australian Agriculture." *Australian Commodities* 14, no. 4 (2007): 657-76.
- Gurran, N., B. Norman, and E. Hamin. "Climate Change Adaptation in Coastal Australia: An Audit of Planning Practice." [In English]. *Ocean and Coastal Management* 86 (2013): 100-09.
- Hancock, N., and R. Gallagher. "How Ready Are We to Move Species Threatened from Climate Change? Insights into the Assisted Colonization Debate from Australia." [In English]. *Austral Ecology* 39, no. 7 (2014): 830-38.
- Hansen, A., P. Bi, M. Nitschke, D. Pisaniello, J. Newbury, and A. Kitson. "Perceptions of Heat-Susceptibility in Older Persons: Barriers to Adaptation." [In English]. *International Journal of Environmental Research and Public Health* 8, no. 12 (2011): 4714-28.
- Harrison, M. T., B. R. Cullen, and D. Armstrong. "Management Options for Dairy Farms under Climate Change: Effects of Intensification, Adaptation and Simplification on Pastures, Milk Production and Profitability." *Agricultural Systems* 155 (2017): 19-32.
- Hart, C. R., H. L. Berry, and A. M. Tonna. "Improving the Mental Health of Rural New South Wales Communities Facing Drought and Other Adversities." [In English]. *Australian Journal of Rural Health* 19, no. 5 (2011): 231-38.
- Hasan, H., S. Smith, and P. Finnegan. "An Activity Theoretic Analysis of the Mediating Role of Information Systems in Tackling Climate Change Adaptation." *Information Systems Journal* 27, no. 3 (2017): 271-308.
- Hatvani-Kovacs, G., M. Belusko, N. Skinner, J. Pockett, and J. Boland. "Drivers and Barriers to Heat Stress Resilience." *Science of the Total Environment* 571 (Nov 15 2016): 603-14.
- Head, L., J. Atchison, A. Gates, and P. Muir. "A Fine-Grained Study of the Experience of Drought, Risk and Climate Change among Australian Wheat Farming Households." [In English]. *Annals of the Association of American Geographers* 101, no. 5 (2011): 1089-108.
- Head, L., C. Gibson, N. Gill, C. Carr, and G. Waitt. "A Meta-Ethnography to Synthesise Household Cultural Research for Climate Change Response." *Local Environment* 21, no. 12 (2016): 1467-81.
- Hennessy, K. J., P. H. Whetton, K. Walsh, I. N. Smith, J. M. Bathols, M. Hutchinson, and J. Sharples. "Climate Change Effects on Snow Conditions in Mainland Australia and Adaptation at Ski Resorts through Snowmaking." [In English]. *Climate Research* 35, no. 3 (2008): 255-70.
- Hine, D. W., W. J. Phillips, R. Cooksey, J. P. Reser, P. Nunn, A. D. G. Marks, N. M. Loi, and S. E. Watt. "Preaching to Different Choirs: How to Motivate Dismissive, Uncommitted, and Alarmed Audiences to Adapt to Climate Change?" *Global Environmental Change* 36 (2016): 1-11.
- Hobson, K., and S. Niemeyer. "Public Responses to Climate Change: The Role of Deliberation in Building Capacity for Adaptive Action." [In English]. *Global Environmental Change* 21, no. 3 (2011): 957-71.
- Hogan, A., A. Bode, and H. Berry. "Farmer Health and Adaptive Capacity in the Face of Climate

- Change and Variability. Part 2: Contexts, Personal Attributes and Behaviors." [In English]. *International Journal of Environmental Research and Public Health* 8, no. 10 (2011): 4055-68.
- Howden, S. M., and S. Crimp. "Assessing Dangerous Climate Change Impacts on Australia's Wheat Industry." Paper presented at the International Congress on Modelling and Simulation: Advances and Applications for Management and Decision Making, MODSIM05, Melbourne, VIC, 2005.
- Huai, J. "Integration and Typologies of Vulnerability to Climate Change: A Case Study from Australian Wheat Sheep Zones." *Scientific Reports* 6 (Sep 27 2016): 33744.
- . "Role of Livelihood Capital in Reducing Climatic Vulnerability: Insights of Australian Wheat from 1990-2010." *PLoS ONE* 11, no. 3 (2016): e0152277.
- Huntjens, P., L. Lebel, C. Pahl-Wostl, J. Camkin, R. Schulze, and N. Kranz. "Institutional Design Propositions for the Governance of Adaptation to Climate Change in the Water Sector." [In English]. *Global Environmental Change* 22, no. 1 (2012): 67-81.
- Hurlimann, A. "Household Use of and Satisfaction with Alternative Water Sources in Victoria Australia." [In English]. *Journal of Environmental Management* 92, no. 10 (2011): 2691-97.
- Hurlimann, A., J. Barnett, R. Fincher, N. Osbaldiston, C. Mortreux, and S. Graham. "Urban Planning and Sustainable Adaptation to Sea-Level Rise." [In English]. *Landscape and Urban Planning* 126 (2014): 84-93.
- Hurlimann, A., and S. Dolnicar. "Voluntary Relocation - an Exploration of Australian Attitudes in the Context of Drought, Recycled and Desalinated Water." [In English]. *Global Environmental Change* 21, no. 3 (2011): 1084-94.
- Isler, P. L., J. Merson, and D. Roser. "'Drought Proofing' Australian Cities: Implications for Climate Change Adaptation and Sustainability." [In English]. *World Academy of Science, Engineering and Technology* 46 (2010): 351-59.
- Jacobs, B. C., C. Lee, D. O'Toole, and K. Vines. "Integrated Regional Vulnerability Assessment of Government Services to Climate Change." *International Journal of Climate Change Strategies and Management* 6, no. 3 (2014): 272-95.
- Jakku, E., P. J. Thorburn, N. A. Marshall, A. M. Dowd, S. M. Howden, E. Mendham, K. Moon, and C. Brandon. "Learning the Hard Way: A Case Study of an Attempt at Agricultural Transformation in Response to Climate Change." *Climatic Change* 137, no. 3-4 (2016): 557-74.
- James, S. W., and S. Friel. "An Integrated Approach to Identifying and Characterising Resilient Urban Food Systems to Promote Population Health in a Changing Climate." *Public Health Nutrition* 18, no. 13 (Sep 2015): 2498-508.
- Jennings, S., S. Pascoe, S. Hall-Aspland, B. Le Bouhellec, A. Norman-Lopez, A. Sullivan, and G. Pecl. "Setting Objectives for Evaluating Management Adaptation Actions to Address Climate Change Impacts in South-Eastern Australian Fisheries." *Fisheries Oceanography* 25 (2016): 29-44.
- Jiang, Q., and R. Q. Grafton. "Economic Effects of Climate Change in the Murray-Darling Basin, Australia." [In English]. *Agricultural Systems* 110 (2012): 10-16.
- Johnson, J. E., and D. J. Welch. "Climate Change Implications for Torres Strait Fisheries: Assessing Vulnerability to Inform Adaptation." *Climatic Change* 135, no. 3-4 (2016): 611-24.
- Jopp, R., T. DeLacy, J. Mair, and M. Fluker. "Using a Regional Tourism Adaptation Framework to Determine Climate Change Adaptation Options for Victoria's Surf Coast." [In English]. *Asia Pacific Journal of Tourism Research* 18, no. 1-2 (2013): 144-64.
- Kaine, G., and L. Cowan. "Using General Systems Theory to Understand How Farmers Manage Variability." [In English]. *Systems Research and Behavioral Science* 28, no. 3 (2011): 231-44.
- Kandulu, J. M., B. A. Bryan, D. King, and J. D. Connor. "Mitigating Economic Risk from Climate Variability in Rain-Fed Agriculture through Enterprise Mix Diversification." [In English].

- Ecological Economics* 79 (2012): 105-12.
- Kellett, J. "Australian Cities and Climate Change." *Built Environment* 42, no. 1 (2016): 145-57.
- Kennedy, D., L. Stocker, and G. Burke. "Australian Local Government Action on Climate Change Adaptation: Some Critical Reflections to Assist Decision-Making." [In English]. *Local Environment* 15, no. 9 (2010): 805-16.
- Keogh, D. U., A. Apan, S. Mushtaq, D. King, and M. Thomas. "Resilience, Vulnerability and Adaptive Capacity of an Inland Rural Town Prone to Flooding: A Climate Change Adaptation Case Study of Charleville, Queensland, Australia." [In English]. *Natural Hazards* 59, no. 2 (2011): 699-723.
- Keys, N., M. Bussey, D. C. Thomsen, T. Lynam, and T. F. Smith. "Building Adaptive Capacity in South East Queensland, Australia." [In English]. *Regional Environmental Change* 14, no. 2 (2014): 501-12.
- Keys, N., D. C. Thomsen, and T. F. Smith. "Adaptive Capacity and Climate Change: The Role of Community Opinion Leaders." *Local Environment* 21, no. 4 (2016): 432-50.
- Khan, S. "Managing Climate Risks in Australia: Options for Water Policy and Irrigation Management." [In English]. *Australian Journal of Experimental Agriculture* 48, no. 3 (2008): 265-73.
- Kiem, A. S. "Drought and Water Policy in Australia: Challenges for the Future Illustrated by the Issues Associated with Water Trading and Climate Change Adaptation in the Murray-Darling Basin." [In English]. *Global Environmental Change* 23, no. 6 (2013): 1615-26.
- Kiem, A. S., and E. K. Austin. "Disconnect between Science and End-Users as a Barrier to Climate Change Adaptation." [In English]. *Climate Research* 58, no. 1 (2013): 29-41.
- . "Drought and the Future of Rural Communities: Opportunities and Challenges for Climate Change Adaptation in Regional Victoria, Australia." [In English]. *Global Environmental Change* 23, no. 5 (2013): 1307-16.
- King, D., D. Bird, K. Haynes, H. Boon, A. Cottrell, J. Millar, T. Okada, *et al.* "Voluntary Relocation as an Adaptation Strategy to Extreme Weather Events." [In English]. *International Journal of Disaster Risk Reduction* 8 (2014): 83-90.
- Kjellstrom, T., and H. J. Weaver. "Climate Change and Health: Impacts, Vulnerability, Adaptation and Mitigation." *New South Wales public health bulletin* 20, no. 1-2 (Jan-Feb 2009): 5-9.
- Klocker, N., L. Head, O. Dun, and T. Spaven. "Experimenting with Agricultural Diversity: Migrant Knowledge as a Resource for Climate Change Adaptation." *Journal of Rural Studies* 57 (2018): 13-24.
- Kuehne, G. "How Do Farmers' Climate Change Beliefs Affect Adaptation to Climate Change?" [In English]. *Society and Natural Resources* 27, no. 5 (2014): 492-506.
- Laing, A., S. Crimp, P. R. Brown, D. Gaydon, and P. Poulton. "Modelling the Impacts of and Adaptation Responses to Climate Variability and Change in Australian Cropping Systems." Paper presented at the 18th World IMACS Congress and International Congress on Modelling and Simulation: Interfacing Modelling and Simulation with Mathematical and Computational Sciences, MODSIM09, Cairns, QLD, 2009.
- Laves, G., S. Kenway, D. Begbie, A. Roiko, R. W. Carter, and P. Waterman. "The Research-Policy Nexus in Climate Change Adaptation: Experience from the Urban Water Sector in South East Queensland, Australia." [In English]. *Regional Environmental Change* 14, no. 2 (2014): 449-61.
- Lavorel, S., M. J. Colloff, S. McIntyre, M. D. Doherty, H. T. Murphy, D. J. Metcalfe, M. Dunlop, *et al.* "Ecological Mechanisms Underpinning Climate Adaptation Services." *Global Change Biology* 21, no. 1 (Jan 2015): 12-31.
- Lee, J. R., R. Maggini, M. F. J. Taylor, and R. A. Fuller. "Mapping the Drivers of Climate Change Vulnerability for Australia's Threatened Species." *PLoS ONE* 10, no. 5 (2015): e0124766.

- Leonard, S., M. Parsons, K. Olawsky, and F. Kofod. "The Role of Culture and Traditional Knowledge in Climate Change Adaptation: Insights from East Kimberley, Australia." [In English]. *Global Environmental Change* 23, no. 3 (2013): 623-32.
- Lereboullet, A. L., G. Beltrando, and D. K. Bardsley. "Socio-Ecological Adaptation to Climate Change: A Comparative Case Study from the Mediterranean Wine Industry in France and Australia." [In English]. *Agriculture, Ecosystems and Environment* 164 (2013): 273-85.
- Li, C., and R. Cox. "Stability of Hanbars for Upgrading of Breakwaters with Sea Level Rise." Paper presented at the Coasts and Ports 2013, Sydney, NSW, 2013.
- Li, Y., and M. G. Stewart. "Cyclone Damage Risks Caused by Enhanced Greenhouse Conditions and Economic Viability of Strengthened Residential Construction." [In English]. *Natural Hazards Review* 12, no. 1 (2011): 9-18.
- Liem, G. A. D., and A. J. Martin. "Young People's Responses to Environmental Issues: Exploring the Roles of Adaptability and Personality." *Personality and Individual Differences* 79 (2015): 91-97.
- Lim-Camacho, L., A. Ariyawardana, G. K. Lewis, S. J. Crimp, S. Somogyi, B. Ridoutt, and S. M. Howden. "Climate Adaptation of Food Value Chains: The Implications of Varying Consumer Acceptance." *Regional Environmental Change* 17, no. 1 (2017): 93-103.
- Lim-Camacho, L., A. J. Hobday, R. H. Bustamante, A. Farmery, A. Fleming, S. Frusher, B. S. Green, et al. "Facing the Wave of Change: Stakeholder Perspectives on Climate Adaptation for Australian Seafood Supply Chains." [In English]. *Regional Environmental Change* 15, no. 4 (2014): 595-606.
- Lin, B. B., T. Capon, A. Langston, B. Taylor, R. Wise, R. Williams, and N. Lazarow. "Adaptation Pathways in Coastal Case Studies: Lessons Learned and Future Directions." *Coastal Management* 45, no. 5 (2017): 384-405.
- Lin, B. B., Y. B. Khoo, M. Inman, C. H. Wang, S. Tapsuwan, and X. Wang. "Assessing Inundation Damage and Timing of Adaptation: Sea Level Rise and the Complexities of Land Use in Coastal Communities." [In English]. *Mitigation and Adaptation Strategies for Global Change* 19, no. 5 (2014): 551-68.
- Lindenmayer, D. B., W. Steffen, A. A. Burbidge, L. Hughes, R. L. Kitching, W. Musgrave, M. Stafford Smith, and P. A. Werner. "Conservation Strategies in Response to Rapid Climate Change: Australia as a Case Study." [In English]. *Biological Conservation* 143, no. 7 (2010): 1587-93.
- Linnenluecke, M. K., A. Griffiths, and P. J. Mumby. "Executives' Engagement with Climate Science and Perceived Need for Business Adaptation to Climate Change." *Climatic Change* 131, no. 2 (2015): 321-33.
- Linnenluecke, M. K., A. Stathakis, and A. Griffiths. "Firm Relocation as Adaptive Response to Climate Change and Weather Extremes." [In English]. *Global Environmental Change* 21, no. 1 (2011): 123-33.
- Liu, D. L., B. Timbal, J. Mo, and H. Fairweather. "A Gis-Based Climate Change Adaptation Strategy Tool." [In English]. *International Journal of Climate Change Strategies and Management* 3, no. 2 (2011): 140-55.
- Liu, D. L., K. T. Zeleke, B. Wang, I. Macadam, F. Scott, and R. J. Martin. "Crop Residue Incorporation Can Mitigate Negative Climate Change Impacts on Crop Yield and Improve Water Use Efficiency in a Semiarid Environment." *European Journal of Agronomy* 85 (2017): 51-68.
- Loch, A., and D. Adamson. "Drought and the Rebound Effect: A Murray–Darling Basin Example." *Natural Hazards* 79, no. 3 (2015): 1429-49.
- Loch, A., H. Bjornlund, and G. Kuehne. "Water Trade Alternatives in the Face of Climate Change." [In English]. *Management of Environmental Quality* 21, no. 2 (2010): 226-36.

- Lockart, N., G. Willgoose, G. Kuczera, A. S. Kiem, A. F. M. K. Chowdhury, N. P. Manage, L. Zhang, and C. Twomey. "Case Study on the Use of Dynamically Downscaled Climate Model Data for Assessing Water Security in the Lower Hunter Region of the Eastern Seaboard of Australia." *Journal of Southern Hemisphere Earth Systems Science* 66, no. 2 (2016): 177-202.
- Lockwood, M., M. Mitchell, S. A. Moore, and S. Clement. "Biodiversity Governance and Social-Ecological System Dynamics: Transformation in the Australian Alps." [In English]. *Ecology and Society* 19, no. 2 (2014).
- Loechel, B., J. Hodgkinson, and K. Moffat. "Climate Change Adaptation in Australian Mining Communities: Comparing Mining Company and Local Government Views and Activities." [In English]. *Climatic Change* 119, no. 2 (2013): 465-77.
- Loosemore, M., J. Carthey, V. Chandra, and A. M. Chand. "Climate Change Risks and Opportunities in Hospital Adaptation." [In English]. *International Journal of Disaster Resilience in the Built Environment* 2, no. 3 (2011): 210-21.
- Loughnan, M. E., M. Carroll, and N. Tapper. "Learning from Our Older People: Pilot Study Findings on Responding to Heat." [In English]. *Australas J Ageing* 33, no. 4 (Dec 2014): 271-7.
- Löwe, R., C. Urich, N. Sto. Domingo, O. Mark, A. Deletic, and K. Arnbjerg-Nielsen. "Assessment of Urban Pluvial Flood Risk and Efficiency of Adaptation Options through Simulations – a New Generation of Urban Planning Tools." *Journal of Hydrology* 550 (2017): 355-67.
- Ludwig, F., and S. Asseng. "Impacts and Adaptation to Climate Change in Western Australian Wheat Cropping Systems." Paper presented at the International Congress on Modelling and Simulation: Advances and Applications for Management and Decision Making, MODSIM05, Melbourne, VIC, 2005.
- Lukasiewicz, A., J. Pittock, and M. Finlayson. "Institutional Challenges of Adopting Ecosystem-Based Adaptation to Climate Change." *Regional Environmental Change* 16, no. 2 (2016): 487-99.
- Luo, Q., M. Bange, and D. Johnston. "Environment and Cotton Fibre Quality." *Climatic Change* 138, no. 1-2 (2016): 207-21.
- Luo, Q., K. Behrendt, and M. Bange. "Economics and Risk of Adaptation Options in the Australian Cotton Industry." *Agricultural Systems* 150 (2017): 46-53.
- Luo, Q., W. Bellotti, M. Williams, and E. Wang. "Adaptation to Climate Change of Wheat Growing in South Australia: Analysis of Management and Breeding Strategies." [In English]. *Agriculture, Ecosystems and Environment* 129, no. 1-3 (2009): 261-67.
- Lynam, T. "Making Sense of What Enables and What Constrains Adaptation to Climate Change." Paper presented at the 19th International Congress on Modelling and Simulation - Sustaining Our Future: Understanding and Living with Uncertainty, MODSIM2011, Perth, WA, 2011.
- Lyth, A., A. Harwood, A. J. Hobday, and J. McDonald. "Place Influences in Framing and Understanding Climate Change Adaptation Challenges." *Local Environment* 21, no. 6 (2016): 730-51.
- Macfadyen, S., G. McDonald, and M. P. Hill. "From Species Distributions to Climate Change Adaptation: Knowledge Gaps in Managing Invertebrate Pests in Broad-Acre Grain Crops." *Agriculture, Ecosystems and Environment* 253 (2018): 208-19.
- Macintosh, A. "Coastal Climate Hazards and Urban Planning: How Planning Responses Can Lead to Maladaptation." [In English]. *Mitigation and Adaptation Strategies for Global Change* 18, no. 7 (2013): 1035-55.
- MacKey, B., S. Berry, S. Hugh, S. Ferrier, T. D. Harwood, and K. J. Williams. "Ecosystem Greenspots: Identifying Potential Drought, Fire, and Climate-Change Micro-Refuges." [In English]. *Ecological Applications* 22, no. 6 (2012): 1852-64.
- Mair, J. "Events and Climate Change: An Australian Perspective." *International Journal of Event and*

- Festival Management* 2, no. 3 (2011): 245-53.
- Mallawaarachchi, T., C. Nauges, O. Sanders, and J. Quiggin. "State-Contingent Analysis of Farmers' Response to Weather Variability: Irrigated Dairy Farming in the Murray Valley, Australia." *Australian Journal of Agricultural and Resource Economics* 61, no. 1 (2017): 36-55.
- Malone, Elizabeth L., and Susan Kinnear. "How and Why: Complementary Analyses of Social Network Structures and Cultural Values: Improving Flood Response Networks in Queensland, Australia." [In English]. *Quality & Quantity* 49, no. 1 (2014): 203-20.
- Manalil, S., and K. Flower. "Soil Water Conservation and Nitrous Oxide Emissions from Different Crop Sequences and Fallow under Mediterranean Conditions." [In English]. *Soil and Tillage Research* 143 (2014): 123-29.
- Mansergh, I., D. Cheal, and J. A. Fitzsimons. "Future Landscapes in South-Eastern Australia: The Role of Protected Areas and Biolinks in Adaptation to Climate Change." [In English]. *Biodiversity* 9, no. 3-4 (2008): 59-70.
- Maraseni, T. N., S. Mushtaq, and K. Reardon-Smith. "Integrated Analysis for a Carbon- and Water-Constrained Future: An Assessment of Drip Irrigation in a Lettuce Production System in Eastern Australia." [In English]. *J Environ Manage* 111 (Nov 30 2012): 220-6.
- . "Climate Change, Water Security and the Need for Integrated Policy Development: The Case of on-Farm Infrastructure Investment in the Australian Irrigation Sector." [In English]. *Environmental Research Letters* 7, no. 3 (2012).
- Marina Pickering, C., and R. C. Buckley. "Climate Response by the Ski Industry: The Shortcomings of Snowmaking for Australian Resorts." [In English]. *Ambio* 39, no. 6 (2010): 430-38.
- Marshall, G. R., D. W. Hine, and M. J. East. "Can Community-Based Governance Strengthen Citizenship in Support of Climate Change Adaptation? Testing Insights from Self-Determination Theory." *Environmental Science and Policy* 72 (2017): 1-9.
- Marshall, N., and C. J. Stokes. "Identifying Thresholds and Barriers to Adaptation through Measuring Climate Sensitivity and Capacity to Change in an Australian Primary Industry." [In English]. *Climatic Change* 126, no. 3-4 (2014): 399-411.
- Marshall, N. A. "Understanding Social Resilience to Climate Variability in Primary Enterprises and Industries." [In English]. *Global Environmental Change* 20, no. 1 (2010): 36-43.
- . "Assessing Resource Dependency on the Rangelands as a Measure of Climate Sensitivity." [In English]. *Society and Natural Resources* 24, no. 10 (2011): 1105-15.
- Marshall, N. A., S. Crimp, M. Curnock, M. Greenhill, G. Kuehne, Z. Leviston, and J. Ouzman. "Some Primary Producers Are More Likely to Transform Their Agricultural Practices in Response to Climate Change Than Others." *Agriculture, Ecosystems and Environment* 222 (2016): 38-47.
- Marshall, N. A., A. M. Dowd, A. Fleming, C. Gambley, M. Howden, E. Jakku, C. Larsen, *et al.* "Transformational Capacity in Australian Peanut Farmers for Better Climate Adaptation." [In English]. *Agronomy for Sustainable Development* 34, no. 3 (2014): 583-91.
- Marshall, N. A., I. J. Gordon, and A. J. Ash. "The Reluctance of Resource-Users to Adopt Seasonal Climate Forecasts to Enhance Resilience to Climate Variability on the Rangelands." [In English]. *Climatic Change* 107, no. 3 (2011): 511-29.
- Marshall, N. A., S. E. Park, W. N. Adger, K. Brown, and S. M. Howden. "Transformational Capacity and the Influence of Place and Identity." [In English]. *Environmental Research Letters* 7, no. 3 (2012).
- Marshall, N. A., and C. J. Stokes. "Influencing Adaptation Processes on the Australian Rangelands for Social and Ecological Resilience." [In English]. *Ecology and Society* 19, no. 2 (2014).
- Marshall, N. A., C. J. Stokes, N. P. Webb, P. A. Marshall, and A. J. Lankester. "Social Vulnerability to

- Climate Change in Primary Producers: A Typology Approach." [In English]. *Agriculture, Ecosystems and Environment* 186 (2014): 86-93.
- Marshall, N. A., R. C. Tobin, P. A. Marshall, M. Gooch, and A. J. Hobday. "Social Vulnerability of Marine Resource Users to Extreme Weather Events." [In English]. *Ecosystems* 16, no. 5 (2013): 797-809.
- Matthews, T. "Storylines of Institutional Responses to Climate Change as a Transformative Stressor: The Case of Regional Planning in South East Queensland, Australia." *Environment and Planning C: Government and Policy* 33, no. 5 (2015): 1092-107.
- Mazur, N., A. Curtis, and M. Rogers. "Do You See What I See? Rural Landholders' Belief in Climate Change." [In English]. *Society and Natural Resources* 26, no. 1 (2013): 75-85.
- McAllister, R. R. J., R. McCrea, and M. N. Lubell. "Policy Networks, Stakeholder Interactions and Climate Adaptation in the Region of South East Queensland, Australia." [In English]. *Regional Environmental Change* 14, no. 2 (Mar 2014): 527-39.
- McDonald, K., B. Stewart, and G. Dingle. "Managing Multi-Purpose Leisure Facilities in a Time of Climate Change." [In English]. *Managing Leisure* 19, no. 3 (2014): 212-25.
- McIntyre-Tamwoy, S., M. Fuary, and A. Buhrich. "Understanding Climate, Adapting to Change: Indigenous Cultural Values and Climate Change Impacts in North Queensland." [In English]. *Local Environment* 18, no. 1 (2013): 91-109.
- McManus, P., K. K. Shrestha, and D. Yoo. "Equity and Climate Change: Local Adaptation Issues and Responses in the City of Lake Macquarie, Australia." *Urban Climate* 10, no. P1 (2014): 1-18.
- McNamara, K. E., and R. Westoby. "Local Knowledge and Climate Change Adaptation on Erub Island, Torres Strait." [In English]. *Local Environment* 16, no. 9 (2011): 887-901.
- McNamara, K. E., R. Westoby, and S. G. Smithers. "Identification of Limits and Barriers to Climate Change Adaptation: Case Study of Two Islands in Torres Strait, Australia." *Geographical Research* 55, no. 4 (2017): 438-55.
- Measham, T. G., B. L. Preston, T. F. Smith, C. Brooke, R. Gorddard, G. Withycombe, and C. Morrison. "Adapting to Climate Change through Local Municipal Planning: Barriers and Challenges." [In English]. *Mitigation and Adaptation Strategies for Global Change* 16, no. 8 (2011): 889-909.
- Mee, K. J., L. Instone, M. Williams, J. Palmer, and N. Vaughan. "Renting over Troubled Waters: An Urban Political Ecology of Rental Housing." *Geographical Research* 52, no. 4 (2014): 365-76.
- Metcalf, S. J., E. I. van Putten, S. Frusher, N. A. Marshall, M. Tull, N. Caputi, M. Haward, *et al.* "Measuring the Vulnerability of Marine Social-Ecological Systems: A Prerequisite for the Identification of Climate Change Adaptations." *Ecology and Society* 20, no. 2 (2015).
- Meynecke, J. O., R. Richards, and O. Sahin. "Whale Watch or No Watch: The Australian Whale Watching Tourism Industry and Climate Change." *Regional Environmental Change* 17, no. 2 (2017): 477-88.
- Millar, J. E., H. Boon, and D. King. "Do Wildfire Experiences Influence Views on Climate Change?." *International Journal of Climate Change Strategies and Management* 7, no. 2 (2015): 124-39.
- Mills, M., K. Mutafoglu, V. M. Adams, C. Archibald, J. Bell, and J. X. Leon. "Perceived and Projected Flood Risk and Adaptation in Coastal Southeast Queensland, Australia." *Climatic Change* 136, no. 3-4 (2016): 523-37.
- Mirfenderesk, H., and D. Corkill. "The Need for Adaptive Strategic Planning: Sustainable Management of Risks Associated with Climate Change." *International Journal of Climate Change Strategies and Management* 1, no. 2 (2009): 146-59.
- Mitchell, M. L., H. C. Norman, and R. D. B. Whalley. "Use of Functional Traits to Identify Australian Forage Grasses, Legumes and Shrubs for Domestication and Use in Pastoral Areas under a



- Changing Climate." *Crop and Pasture Science* 66, no. 1 (2015): 71-89.
- Moloney, G., Z. Leviston, T. Lynam, J. Price, S. Stone-Jovicich, and D. Blair. "Using Social Representations Theory to Make Sense of Climate Change: What Scientists and Nonscientists in Australia Think." [In English]. *Ecology and Society* 19, no. 3 (2014).
- Monjardino, M., D. Revell, and D. J. Pannell. "The Potential Contribution of Forage Shrubs to Economic Returns and Environmental Management in Australian Dryland Agricultural Systems." [In English]. *Agricultural Systems* 103, no. 4 (2010): 187-97.
- Morrison, C., and C. M. Pickering. "Perceptions of Climate Change Impacts, Adaptation and Limits to Adaption in the Australian Alps: The Ski-Tourism Industry and Key Stakeholders." [In English]. *Journal of Sustainable Tourism* 21, no. 2 (2013): 173-91.
- Mukheibir, P., N. Kuruppu, A. Gero, and J. Herriman. "Overcoming Cross-Scale Challenges to Climate Change Adaptation for Local Government: A Focus on Australia." [In English]. *Climatic Change* 121, no. 2 (2013): 271-83.
- Mushtaq, S. "Economic and Policy Implications of Relocation of Agricultural Production Systems under Changing Climate: Example of Australian Rice Industry." *Land Use Policy* 52 (2016): 277-86.
- Mushtaq, S., N. White, G. Cockfield, B. Power, and G. Jakeman. "Reconfiguring Agriculture through the Relocation of Production Systems for Water, Environment and Food Security under Climate Change." *Journal of Agricultural Science* 153, no. 5 (2015): 779-97.
- Myers, S. A., M. J. Blackmore, T. F. Smith, and R. W. Bill Carter. "Climate Change and Stewardship: Strategies to Build Community Resilience in the Capricorn Coast." [In English]. *Australasian Journal of Environmental Management* 19, no. 3 (2012): 164-81.
- Nacipucha, D., L. Ruhanen, and C. Cooper. "Adaption to Climate Change: A Knowledge Management Approach." *Anatolia* 28, no. 3 (2017): 422-31.
- Nalau, J., B. L. Preston, and M. C. Maloney. "Is Adaptation a Local Responsibility?". *Environmental Science and Policy* 48 (2015): 89-98.
- Nelson, R., M. Howden, and M. S. Smith. "Using Adaptive Governance to Rethink the Way Science Supports Australian Drought Policy." [In English]. *Environmental Science and Policy* 11, no. 7 (2008): 588-601.
- Nettle, R., M. Ayre, R. Beilin, S. Waller, L. Turner, A. Hall, L. Irvine, and G. Taylor. "Empowering Farmers for Increased Resilience in Uncertain Times." *Animal Production Science* 55, no. 7 (2015): 843-55.
- Ng, A. K. Y., S. L. Chen, S. Cahoon, B. Brooks, and Z. Yang. "Climate Change and the Adaptation Strategies of Ports: The Australian Experiences." [In English]. *Research in Transportation Business and Management* 8 (2013): 186-94.
- Niven, R. J., and D. K. Bardsley. "Planned Retreat as a Management Response to Coastal Risk: A Case Study from the Fleurieu Peninsula, South Australia." [In English]. *Regional Environmental Change* 13, no. 1 (2013): 193-209.
- Norambuena, F., A. Rombenso, and G. M. Turchini. "Towards the Optimization of Performance of Atlantic Salmon Reared at Different Water Temperatures Via the Manipulation of Dietary Ara/Epa Ratio." *Aquaculture* 450 (2016): 48-57.
- Norton, B. A., A. M. Coutts, S. J. Livesley, R. J. Harris, A. M. Hunter, and N. S. G. Williams. "Planning for Cooler Cities: A Framework to Prioritise Green Infrastructure to Mitigate High Temperatures in Urban Landscapes." *Landscape and Urban Planning* 134 (2015): 127-38.
- Nurse-Bray, M. "Climate Change Adaptation in Australia: Education, Training and Achieving Social and Political Outcomes." *International Journal of Climate Change Strategies and Management* 2, no. 4 (2010): 393-402.

- Nursey-Bray, M., B. Blackwell, B. Brooks, M. L. Campbell, L. Goldsworthy, H. Pateman, I. Rodrigues, *et al.* "Vulnerabilities and Adaptation of Ports to Climate Change." [In English]. *Journal of Environmental Planning and Management* 56, no. 7 (2013): 1021-45.
- Nursey-Bray, M., G. T. Pecl, S. Frusher, C. Gardner, M. Haward, A. J. Hobday, S. Jennings, *et al.* "Communicating Climate Change: Climate Change Risk Perceptions and Rock Lobster Fishers, Tasmania." [In English]. *Marine Policy* 36, no. 3 (2012): 753-59.
- O'Donnell, T. "Legal Geography and Coastal Climate Change Adaptation: The Vaughan Litigation." *Geographical Research* 54, no. 3 (2016): 301-12.
- O'Neill, C., D. Green, and W. Lui. "How to Make Climate Change Research Relevant for Indigenous Communities in Torres Strait, Australia." [In English]. *Local Environment* 17, no. 10 (2012): 1104-20.
- O'Neill, S. J., and S. Graham. "(En)Visioning Place-Based Adaptation to Sea-Level Rise." *Geo: Geography and Environment* 3, no. 2 (2016).
- O'Reagain, P. J., and J. C. Scanlan. "Sustainable Management for Rangelands in a Variable Climate: Evidence and Insights from Northern Australia." [In English]. *Animal* 7, no. SUPPL.1 (2013): 68-78.
- Ogier, E. M., J. Davidson, P. Fidelman, M. Haward, A. J. Hobday, N. J. Holbrook, E. Hoshino, and G. T. Pecl. "Fisheries Management Approaches as Platforms for Climate Change Adaptation: Comparing Theory and Practice in Australian Fisheries." *Marine Policy* 71 (2016): 82-93.
- Osman, P., L. Havas, M. Ambrose, and K. Williams. "Opportunities to Improve Indoor Temperatures and Electricity Use in Remote Australian Buildings." Paper presented at the Energy Procedia, 2017.
- Pahl, L. I., G. L. Wish, N. D. MacLeod, J. C. Scanlan, and R. A. Cowley. "Improved Pasture Management Can Improve Profitability and Resilience to Climate Change in Northern Australia." Paper presented at the 19th International Congress on Modelling and Simulation - Sustaining Our Future: Understanding and Living with Uncertainty, MODSIM2011, Perth, WA, 2011.
- Palmer, J., H. Bennetts, S. Pullen, J. Zuo, T. Ma, and N. Chileshe. "The Effect of Dwelling Occupants on Energy Consumption: The Case of Heat Waves in Australia." [In English]. *Architectural Engineering and Design Management* 10, no. 1-2 (2014): 40-59.
- . "Adaptation of Australian Houses and Households to Future Heat Waves." Paper presented at the 7th Australasian Housing Researchers' Conference, AHRC 2013, 2014.
- Park, S. E., N. A. Marshall, E. Jakku, A. M. Dowd, S. M. Howden, E. Mendham, and A. Fleming. "Informing Adaptation Responses to Climate Change through Theories of Transformation." [In English]. *Global Environmental Change* 22, no. 1 (2012): 115-26.
- Patrick, R., and J. A. Smith. "Core Health Promotion Competencies in Australia: Are They Compatible with Climate Change Action?" *Health promotion journal of Australia : official journal of Australian Association of Health Promotion Professionals* 22 Spec No (2011): S28-33.
- Paydar, Z., and M. E. Qureshi. "Irrigation Water Management in Uncertain Conditions-Application of Modern Portfolio Theory." [In English]. *Agricultural Water Management* 115 (2012): 47-54.
- Pecl, G. T., T. M. Ward, Z. A. Doubleday, S. Clarke, J. Day, C. Dixon, S. Frusher, *et al.* "Rapid Assessment of Fisheries Species Sensitivity to Climate Change." [In English]. *Climatic Change* 127, no. 3-4 (2014): 505-20.
- Pelizaro, C., K. Benke, and V. Sposito. "A Modelling Framework for Optimisation of Commodity Production by Minimising the Impact of Climate Change." [In English]. *Applied Spatial Analysis and Policy* 4, no. 3 (2011): 201-22.

- Petheram, L., N. Stacey, and A. Fleming. "Future Sea Changes: Indigenous Women's Preferences for Adaptation to Climate Change on South Goulburn Island, Northern Territory (Australia)." *Climate and Development* 7, no. 4 (2015): 339-52.
- Petheram, L., K. K. Zander, B. M. Campbell, C. High, and N. Stacey. "'Strange Changes': Indigenous Perspectives of Climate Change and Adaptation in Ne Arnhem Land (Australia)." [In English]. *Global Environmental Change* 20, no. 4 (2010): 681-92.
- Petrie, P. R., S. J. Brooke, M. A. Moran, and V. O. Sadras. "Pruning after Budburst to Delay and Spread Grape Maturity." *Australian Journal of Grape and Wine Research* 23, no. 3 (2017): 378-89.
- Pettit, C., S. Williams, I. Bishop, J. P. Aurambout, A. B. M. Russel, A. Michael, S. Sharma, *et al.* "Building an Ecoinformatics Platform to Support Climate Change Adaptation in Victoria." [In English]. *Future Generation Computer Systems* 29, no. 2 (2013): 624-40.
- Pittock, J. "Lessons from Adaptation to Sustain Freshwater Environments in the Murray-Darling Basin, Australia." [In English]. *Wiley Interdisciplinary Reviews: Climate Change* 4, no. 5 (2013): 429-38.
- Pittock, J., and C. M. Finlayson. "Australia's Murraydarling Basin: Freshwater Ecosystem Conservation Options in an Era of Climate Change." [In English]. *Marine and Freshwater Research* 62, no. 3 (2011): 232-43.
- . "Climate Change Adaptation in the Murray-Darling Basin: Reducing Resilience of Wetlands with Engineering." [In English]. *Australian Journal of Water Resources* 17, no. 2 (2013): 161-69.
- Pittock, J., C. M. Finlayson, and J. Howitt. "Beguiling and Risky: 'Environmental Works and Measures' for Wetland Conservation under a Changing Climate." [In English]. *Hydrobiologia* 708, no. 1 (2013): 111-31.
- Pittock, J., K. Hussey, and S. Dovers. "Ecologically Sustainable Development in Broader Retrospect and Prospect: Evaluating National Framework Policies against Climate Adaptation Imperatives." *Australasian Journal of Environmental Management* 22, no. 1 (2015): 62-76.
- Pizarro, J., B. Sainsbury, J. Hodgkinson, and B. Loechel. "Australian Uranium Industry Climate Change Vulnerability Assessment." *Environmental Development* 24 (2017): 109-23.
- Preston, B. L., C. Brooke, T. G. Measham, T. F. Smith, and R. Gorddard. "Igniting Change in Local Government: Lessons Learned from a Bushfire Vulnerability Assessment." [In English]. *Mitigation and Adaptation Strategies for Global Change* 14, no. 3 (2009): 251-83.
- Prideaux, B., A. Coghlan, and K. McNamara. "Assessing Tourists' Perceptions of Climate Change on Mountain Landscapes." *Tourism Recreation Research* 35, no. 2 (2010): 187-99.
- Prokopy, L. S., J. G. Arbuckle, A. P. Barnes, V. R. Haden, A. Hogan, M. T. Niles, and J. Tyndall. "Farmers and Climate Change: A Cross-National Comparison of Beliefs and Risk Perceptions in High-Income Countries." *Environmental Management* 56, no. 2 (Aug 2015): 492-504.
- Puig, C. J., R. Greiner, C. Huchery, I. Perkins, L. Bowen, N. Collier, and S. T. Garnett. "Beyond Cattle: Potential Futures of the Pastoral Industry in the Northern Territory." [In English]. *Rangeland Journal* 33, no. 2 (2011): 181-94.
- Purcell, R., and J. McGirr. "Preparing Rural General Practitioners and Health Services for Climate Change and Extreme Weather." *Australian Journal of Rural Health* 22, no. 1 (Feb 2014): 8-14.
- Quezada, G., G. Grozev, S. Seo, and C. H. Wang. "The Challenge of Adapting Centralised Electricity Systems: Peak Demand and Maladaptation in South East Queensland, Australia." *Regional Environmental Change* 14, no. 2 (2014): 463-73.
- Quiggin, J., D. Adamson, S. Chambers, and P. Schrobback. "Climate Change, Uncertainty, and Adaptation: The Case of Irrigated Agriculture in the Murray-Darling Basin in Australia." [In

- English]. *Canadian Journal of Agricultural Economics* 58, no. 4 (2010): 531-54.
- Qureshi, M. E., S. M. Whitten, and B. Franklin. "Impacts of Climate Variability on the Irrigation Sector in the Southern Murray-Darling Basin, Australia." [In English]. *Water Resources and Economics* 4 (2013): 52-68.
- Race, D., S. Mathew, M. Campbell, and K. Hampton. "Understanding Climate Adaptation Investments for Communities Living in Desert Australia: Experiences of Indigenous Communities." *Climatic Change* 139, no. 3-4 (2016): 461-75.
- Ramm, T. D., S. Graham, C. J. White, and C. S. Watson. "Advancing Values-Based Approaches to Climate Change Adaptation: A Case Study from Australia." *Environmental Science and Policy* 76 (2017): 113-23.
- Raymond, C. M., and G. Brown. "Assessing Spatial Associations between Perceptions of Landscape Value and Climate Change Risk for Use in Climate Change Planning." [In English]. *Climatic Change* 104, no. 3-4 (2011): 653-78.
- Raymond, C. M., and G. M. Robinson. "Factors Affecting Rural Landholders' Adaptation to Climate Change: Insights from Formal Institutions and Communities of Practice." [In English]. *Global Environmental Change* 23, no. 1 (2013): 103-14.
- Raymond, C. M., and J. Spoehr. "The Acceptability of Climate Change in Agricultural Communities: Comparing Responses across Variability and Change." [In English]. *Journal of Environmental Management* 115 (2013): 69-77.
- Reid, G. H. "Building Resilience to Climate Change in Rain-Fed Agricultural Enterprises: An Integrated Property Planning Tool." [In English]. *Agriculture and Human Values* 26, no. 4 (2009): 391-97.
- Richards, R. A., J. R. Hunt, J. A. Kirkegaard, and J. B. Passioura. "Yield Improvement and Adaptation of Wheat to Water-Limited Environments in Australia - a Case Study." [In English]. *Crop and Pasture Science* 65, no. 7 (2014): 676-89.
- Richards, R. G., M. Sanò, and O. Sahin. "Exploring Climate Change Adaptive Capacity of Surf Life Saving in Australia Using Bayesian Belief Networks." *Ocean and Coastal Management* 120 (2016): 148-59.
- Rickards, L., J. Wiseman, T. Edwards, and C. Biggs. "The Problem of Fit: Scenario Planning and Climate Change Adaptation in the Public Sector." [In English]. *Environment and Planning C: Government and Policy* 32, no. 4 (2014): 641-62.
- Robertson, M., and R. Murray-Prior. "Five Reasons Why It Is Difficult to Talk to Australian Farmers About the Impacts of, and Their Adaptation to, Climate Change." [In English]. *Regional Environmental Change* 16, no. 1 (2014): 189-98.
- Rodriguez, D., P. deVoil, B. Power, H. Cox, S. Crimp, and H. Meinke. "The Intrinsic Plasticity of Farm Businesses and Their Resilience to Change. An Australian Example." [In English]. *Field Crops Research* 124, no. 2 (2011): 157-70.
- Rogers, M., A. Curtis, and N. Mazur. "The Influence of Cognitive Processes on Rural Landholder Responses to Climate Change." [In English]. *Journal of Environmental Management* 111 (2012): 258-66.
- Roman, C. E., A. H. Lynch, and D. Dominey-Howes. "Uncovering the Essence of the Climate Change Adaptation Problem—a Case Study of the Tourism Sector at Alpine Shire, Victoria, Australia." [In English]. *Tourism and Hospitality, Planning and Development* 7, no. 3 (2010): 237-52.
- . "What Is the Goal? Framing the Climate Change Adaptation Question through a Problem-Oriented Approach." [In English]. *Weather, Climate, and Society* 3, no. 1 (2011): 16-30.
- Ross, H., S. Shaw, D. Rissik, N. Cliffe, S. Chapman, V. Hounsell, J. Udy, N. T. Trinh, and J. Schoeman. "A Participatory Systems Approach to Understanding Climate Adaptation Needs." *Climatic*

- Change* 129, no. 1-2 (2015): 27-42.
- Ruhanen, L., and A. Shakeela. "Responding to Climate Change: Australian Tourism Industry Perspectives on Current Challenges and Future Directions." [In English]. *Asia Pacific Journal of Tourism Research* 18, no. 1-2 (2013): 35-51.
- Ryan, P. C., and M. G. Stewart. "Cost-Benefit Analysis of Climate Change Adaptation for Power Pole Networks." *Climatic Change* 143, no. 3-4 (2017): 519-33.
- Sadras, V., and M. F. Dreccer. "Adaptation of Wheat, Barley, Canola, Field Pea and Chickpea to the Thermal Environments of Australia." *Crop and Pasture Science* 66, no. 11 (2015): 1137-50.
- Sahin, O., S. Mohamed, J. Warnken, and A. Rahman. "Assessment of Sea-Level Rise Adaptation Options: Multiple-Criteria Decision-Making Approach Involving Stakeholders." [In English]. *Structural Survey* 31, no. 4 (2013): 283-300.
- Sahin, O., R. Siems, R. G. Richards, F. Helfer, and R. A. Stewart. "Examining the Potential for Energy-Positive Bulk-Water Infrastructure to Provide Long-Term Urban Water Security: A Systems Approach." *Journal of Cleaner Production* 143 (2017): 557-66.
- Sanderson, M. R., and A. L. Curtis. "Culture, Climate Change and Farm-Level Groundwater Management: An Australian Case Study." *Journal of Hydrology* 536 (2016): 284-92.
- Sanderson, T., G. Hertzler, T. Capon, and P. Hayman. "A Real Options Analysis of Australian Wheat Production under Climate Change." *Australian Journal of Agricultural and Resource Economics* 60, no. 1 (2016): 79-96.
- Sano, M., S. Baum, M. Bussey, B. Carter, F. Crick, A. Golshani, D. L. Choy, *et al.* "Adapting Coasts to Climatic Futures. An Australian Perspective." Paper presented at the Proceedings of the Coastal Engineering Conference, 2012.
- Sano, M., R. G. Richards, O. Sahin, S. Sherker, and R. Tomlinson. "Engaging Australian Surf Lifesaving in Coastal Hazard and Climate Change Adaptation with Stakeholder Driven Modelling." Paper presented at the 7th International Congress on Environmental Modelling and Software, iEMSs 2014, 2014.
- Scally, J., and G. Wescott. "Perceptions of Climate Change and Adaptation Responses in a Local Community: The Barwon Estuary Complex, Victoria." [In English]. *Australian Geographer* 42, no. 4 (2011): 387-401.
- Seo, S. N. "Adapting to Extreme Climates: Raising Animals in Hot and Arid Ecosystems in Australia." *International Journal of Biometeorology* 59, no. 5 (May 2015): 541-50.
- Serrao-Neumann, S., F. Crick, B. Harman, G. Schuch, and D. L. Choy. "Maximising Synergies between Disaster Risk Reduction and Climate Change Adaptation: Potential Enablers for Improved Planning Outcomes." *Environmental Science and Policy* 50 (2015): 46-61.
- Serrao-Neumann, S., J. L. Davidson, C. L. Baldwin, A. Dedekorkut-Howes, J. C. Ellison, N. J. Holbrook, M. Howes, C. Jacobson, and E. A. Morgan. "Marine Governance to Avoid Tipping Points: Can We Adapt the Adaptability Envelope?" *Marine Policy* 65 (2016): 56-67.
- Serrao-Neumann, S., G. M. Di Giulio, L. C. Ferreira, and D. Low Choy. "Climate Change Adaptation: Is There a Role for Intervention Research?" [In English]. *Futures* 53 (2013): 86-97.
- Serrao-Neumann, S., B. P. Harman, and D. Low Choy. "The Role of Anticipatory Governance in Local Climate Adaptation: Observations from Australia." [In English]. *Planning Practice and Research* 28, no. 4 (2013): 440-63.
- Sexton, J., Y. Everingham, and B. Timbal. "Harvest Disruption Projections for the Australian Sugar Industry." *International Journal of Climate Change Strategies and Management* 7, no. 1 (2015): 41-57.
- Sharifi, E., A. Sivam, and J. Boland. "Spatial and Activity Preferences During Heat Stress Conditions in

- Adelaide: Towards Increased Adaptation Capacity of the Built Environment." Paper presented at the Procedia Engineering, 2017.
- Sharma, V., and D. M. Franks. "In Situ Adaptation to Climatic Change: Mineral Industry Responses to Extreme Flooding Events in Queensland, Australia." [In English]. *Society and Natural Resources* 26, no. 11 (2013): 1252-67.
- Shearer, H., E. Coiacetto, J. Dodson, and P. Taygfeld. "How the Structure of the Australian Housing Development Industry Influences Climate Change Adaptation." *Housing Studies* 31, no. 7 (2016): 809-28.
- Sheaves, M., I. Sporne, C. M. Dichmont, R. Bustamante, P. Dale, R. Deng, L. X. C. Dutra, *et al.* "Principles for Operationalizing Climate Change Adaptation Strategies to Support the Resilience of Estuarine and Coastal Ecosystems: An Australian Perspective." *Marine Policy* 68 (2016): 229-40.
- Sherren, K., J. Fischer, and I. Fazey. "Managing the Grazing Landscape: Insights for Agricultural Adaptation from a Mid-Drought Photo-Elicitation Study in the Australian Sheep-Wheat Belt." [In English]. *Agricultural Systems* 106, no. 1 (2012): 72-83.
- Singh, V., C. T. Nguyen, G. McLean, S. C. Chapman, B. Zheng, E. J. van Oosterom, and G. L. Hammer. "Quantifying High Temperature Risks and Their Potential Effects on Sorghum Production in Australia." *Field Crops Research* 211 (2017): 77-88.
- Singh-Peterson, L., and G. Lawrence. "The Changing Face of the Mary Valley: Considering the Fairness, Sustainability and Resilience of the Agricultural System in a Peri-Urban Setting." *Local Environment* 22, no. 5 (2017): 568-80.
- Smith, E. F., S. N. Lieske, N. Keys, and T. F. Smith. "Rapid Regional-Scale Assessments of Socio-Economic Vulnerability to Climate Change." *Environmental Research Letters* 11, no. 3 (2016).
- Spickett, J. T., H. L. Brown, and D. Katscherian. "Adaptation Strategies for Health Impacts of Climate Change in Western Australia: Application of a Health Impact Assessment Framework." [In English]. *Environmental Impact Assessment Review* 31, no. 3 (2011): 297-300.
- Spillman, C. M., J. R. Hartog, A. J. Hobday, and D. Hudson. "Predicting Environmental Drivers for Prawn Aquaculture Production to Aid Improved Farm Management." *Aquaculture* 447 (2015): 56-65.
- Sposito, V., K. Benke, C. Pelizaro, and R. Wyatt. "Application of Gis-Based Computer Modelling to Planning for Adaption to Climate Change in Rural Areas." [In English]. *Applied GIS* 5, no. 3 (2009): 1-25.
- . "Adaptation to Climate Change in Regional Australia: A Decision-Making Framework for Modelling Policy for Rural Production." [In English]. *Geography Compass* 4, no. 4 (2010): 335-54.
- Sprigg, H., R. Belford, S. Milroy, S. J. Bennett, and D. Bowran. "Adaptations for Growing Wheat in the Drying Climate of Western Australia." [In English]. *Crop and Pasture Science* 65, no. 7 (2014): 627-44.
- Stebbing, M. S., M. Carey, M. Sinclair, and M. Sim. "Understanding the Vulnerability, Resilience and Adaptive Capacity of Households in Rural Victorian Towns in the Context of Long-Term Water Insecurity." [In English]. *Australian Journal of Water Resources* 17, no. 2 (2013): 193-201.
- Stevens, H. R., and A. S. Kiem. "Developing Hazard Lines in Response to Coastal Flooding and Sea Level Change." *Urban Policy and Research* 32, no. 3 (2014): 341-60.
- Stewart, M. G. "Risk and Economic Viability of Housing Climate Adaptation Strategies for Wind Hazards in Southeast Australia." *Mitigation and Adaptation Strategies for Global Change* 20, no. 4 (2015): 601-22.

- Stewart, M. G., and Y. Li. "Methodologies for Economic Impact and Adaptation Assessment of Cyclone Damage Risks Due to Climate Change." [In English]. *Australian Journal of Structural Engineering* 10, no. 2 (2010): 121-35.
- Stewart, M. G., and X. Wang. "Risk Assessment and Economic Viability of Climate Adaptation Measures for Australian Housing Subject to Extreme Wind Events." Paper presented at the 19th International Congress on Modelling and Simulation - Sustaining Our Future: Understanding and Living with Uncertainty, MODSIM2011, Perth, WA, 2011.
- Stewart, M. G., X. Wang, and G. R. Willgoose. "Direct and Indirect Cost-and-Benefit Assessment of Climate Adaptation Strategies for Housing for Extreme Wind Events in Queensland." [In English]. *Natural Hazards Review* 15, no. 4 (2014).
- Stocker, L., G. Burke, D. Kennedy, and D. Wood. "Sustainability and Climate Adaptation: Using Google Earth to Engage Stakeholders." [In English]. *Ecological Economics* 80 (2012): 15-24.
- Strengers, Y., and C. Maller. "Adapting to 'Extreme' Weather: Mobile Practice Memories of Keeping Warm and Cool as a Climate Change Adaptation Strategy." *Environment and Planning A* 49, no. 6 (2017): 1432-50.
- Tan, Y., and M. Chadbourne. "Spatially Identifying Vulnerable Communities to Climate Change Impact in South Australia." *Local Environment* 20, no. 11 (2015): 1265-89.
- Taylor, B. M., and B. P. Harman. "Governing Urban Development for Climate Risk: What Role for Public-Private Partnerships?". *Environment and Planning C: Government and Policy* 34, no. 5 (2016): 927-44.
- Thamo, T., D. Addai, D. J. Pannell, M. J. Robertson, D. T. Thomas, and J. M. Young. "Climate Change Impacts and Farm-Level Adaptation: Economic Analysis of a Mixed Cropping-Livestock System." *Agricultural Systems* 150 (2017): 99-108.
- Thi Tran, L., N. Stoeckl, M. Esparon, and D. Jarvis. "If Climate Change Means More Intense and More Frequent Drought, What Will That Mean for Agricultural Production? A Case Study in Northern Australia." *Australasian Journal of Environmental Management* 23, no. 3 (2016): 281-97.
- Toloo, G., W. Hu, G. Fitzgerald, P. Aitken, and S. Tong. "Projecting Excess Emergency Department Visits and Associated Costs in Brisbane, Australia, under Population Growth and Climate Change Scenarios." *Scientific Reports* 5 (Aug 6 2015): 12860.
- Tomerini, D. M., P. E. Dale, and N. Sipe. "Does Mosquito Control Have an Effect on Mosquito-Borne Disease? The Case of Ross River Virus Disease and Mosquito Management in Queensland, Australia." [In English]. *Journal of the American Mosquito Control Association* 27, no. 1 (2011): 39-44.
- Tonmoy, F. N., and A. El-Zein. "Vulnerability to Sea Level Rise: A Novel Local-Scale Indicator-Based Assessment Methodology and Application to Eight Beaches in Shoalhaven, Australia." *Ecological Indicators* 85 (2018): 295-307.
- Tonmoy, F. N., D. Wainwright, D. C. Verdon-Kidd, and D. Rissik. "An Investigation of Coastal Climate Change Risk Assessment Practice in Australia." *Environmental Science and Policy* 80 (2018): 9-20.
- Tonna, A., B. Kelly, J. Crockett, R. Buss, R. Roberts, M. Wright, and J. Greig. "Improving the Mental Health of Drought Affected Communities: An Australian Model." [In English]. *Rural Society* 19, no. 4 (2009): 296-305.
- Torabi, E., A. Dedekorkut-Howes, and M. Howes. "Adapting or Maladapting: Building Resilience to Climate-Related Disasters in Coastal Cities." *Cities* 72 (2018): 295-309.
- Tryhorn, L. M., and A. H. Lynch. "Climate Change Adaptation in the Alpine Shire of Australia: A Decision Process Appraisal." [In English]. *Policy Sciences* 43, no. 2 (2010): 105-27.

- Tull, M., S. J. Metcalf, and H. Gray. "The Economic and Social Impacts of Environmental Change on Fishing Towns and Coastal Communities: A Historical Case Study of Geraldton, Western Australia." *ICES Journal of Marine Science* 73, no. 5 (2016): 1437-46.
- Turner, L. R., D. Connell, and S. Tong. "The Effect of Heat Waves on Ambulance Attendances in Brisbane, Australia." *Prehospital and disaster medicine* 28, no. 5 (Oct 2013): 482-87.
- Turton, S., T. Dickson, W. Hadwen, B. Jorgensen, T. Pham, D. Simmons, P. Tremblay, and R. Wilson. "Developing an Approach for Tourism Climate Change Assessment: Evidence from Four Contrasting Australian Case Studies." [In English]. *Journal of Sustainable Tourism* 18, no. 3 (2010): 429-47.
- Ugalde, D., A. Brungs, M. Kaebernick, A. McGregor, and B. Slattery. "Implications of Climate Change for Tillage Practice in Australia." [In English]. *Soil and Tillage Research* 97, no. 2 (2007): 318-30.
- van Beurden, E. K., A. M. Kia, D. Hughes, J. D. Fuller, U. Dietrich, K. Howton, and S. Kavooru. "Networked Resilience in Rural Australia--a Role for Health Promotion in Regional Responses to Climate Change." *Health promotion journal of Australia : official journal of Australian Association of Health Promotion Professionals* 22 Spec No (Dec 2011): S54-60.
- van Putten, I. E., S. Jennings, S. Frusher, C. Gardner, M. Haward, A. J. Hobday, M. Nursey-Bray, *et al.* "Building Blocks of Economic Resilience to Climate Change: A South East Australian Fisheries Example." [In English]. *Regional Environmental Change* 13, no. 6 (2013): 1313-23.
- van Putten, I. E., S. Jennings, A. J. Hobday, R. H. Bustamante, L. X. C. Dutra, S. Frusher, E. A. Fulton, *et al.* "Recreational Fishing in a Time of Rapid Ocean Change." *Marine Policy* 76 (2017): 169-77.
- Vasey-Ellis, N. "Planning for Climate Change in Coastal Victoria." [In English]. *Urban Policy and Research* 27, no. 2 (2009): 157-69.
- Viney, N. R., B. C. Bates, S. P. Charles, I. T. Webster, and M. Bormans. "Modelling Adaptive Management Strategies for Coping with the Impacts of Climate Variability and Change on Riverine Algal Blooms." [In English]. *Global Change Biology* 13, no. 11 (2007): 2453-65.
- Wallis, P. J., K. Bosomworth, A. Harwood, and P. Leith. "Charting the Emergence of a 'Knowing System' for Climate Change Adaptation in Australian Regional Natural Resource Management." *Geoforum* 84 (2017): 42-50.
- Wang, C. H., T. Baynes, S. McFallan, J. West, Y. B. Khoo, X. Wang, G. Quezada, *et al.* "Rising Tides: Adaptation Policy Alternatives for Coastal Residential Buildings in Australia." *Structure and Infrastructure Engineering* 12, no. 4 (2016): 463-76.
- Wang, X., Y. B. Khoo, and C. H. Wang. "Risk Assessment and Decision-Making for Residential Housing Adapting to Increasing Storm-Tide Inundation Due to Sea-Level Rise in South East Queensland, Australia." [In English]. *Civil Engineering and Environmental Systems* 31, no. 2 (2014): 125-39.
- Waters, E., J. Barnett, and A. Puleston. "Contrasting Perspectives on Barriers to Adaptation in Australian Climate Change Policy." [In English]. *Climatic Change* 124, no. 4 (2014): 691-702.
- Webb, N. P., and C. J. Stokes. "Climate Change Scenarios to Facilitate Stakeholder Engagement in Agricultural Adaptation." [In English]. *Mitigation and Adaptation Strategies for Global Change* 17, no. 8 (2012): 957-73.
- Webb, N. P., C. J. Stokes, and N. A. Marshall. "Integrating Biophysical and Socio-Economic Evaluations to Improve the Efficacy of Adaptation Assessments for Agriculture." [In English]. *Global Environmental Change* 23, no. 5 (2013): 1164-77.
- Wenger, C. "Building Walls around Flood Problems: The Place of Levees in Australian Flood



- Management." *Australian Journal of Water Resources* 19, no. 1 (2015): 3-30.
- Wheeler, S., A. Zuo, and H. Bjornlund. "Farmers' Climate Change Beliefs and Adaptation Strategies for a Water Scarce Future in Australia." [In English]. *Global Environmental Change* 23, no. 2 (2013): 537-47.
- Wheeler, S. A., A. Zuo, and H. Bjornlund. "Investigating the Delayed on-Farm Consequences of Selling Water Entitlements in the Murray-Darling Basin." [In English]. *Agricultural Water Management* 145 (2014): 72-82.
- Williams, A., S. Mushtaq, L. Kouadio, B. Power, T. Marcussen, D. McRae, and G. Cockfield. "An Investigation of Farm-Scale Adaptation Options for Cotton Production in the Face of Future Climate Change and Water Allocation Policies in Southern Queensland, Australia." *Agricultural Water Management* 196 (2018): 124-32.
- Williams, N. S. G., J. P. Rayner, and K. J. Raynor. "Green Roofs for a Wide Brown Land: Opportunities and Barriers for Rooftop Greening in Australia." [In English]. *Urban Forestry and Urban Greening* 9, no. 3 (2010): 245-51.
- Williams, S., S. Hanson-Easey, G. Robinson, D. Pisaniello, J. Newbury, A. Saniotis, and P. Bi. "Heat Adaptation and Place: Experiences in South Australian Rural Communities." *Regional Environmental Change* 17, no. 1 (2017): 273-83.
- Wiseman, J., L. Williamson, and J. Fritze. "Community Engagement and Climate Change: Learning from Recent Australian Experience." *International Journal of Climate Change Strategies and Management* 2, no. 2 (2010): 134-47.
- Wiseman, N. D., and D. K. Bardsley. "Climate Change and Indigenous Natural Resource Management: A Review of Socio-Ecological Interactions in the Alinytjara Wilurara Nrm Region." [In English]. *Local Environment* 18, no. 9 (2013): 1024-45.
- Wyborn, C. "Landscape Scale Ecological Connectivity: Australian Survey and Rehearsals." [In English]. *Pacific Conservation Biology* 17, no. 2 (2011): 121-31.
- Xiang, J., A. Hansen, D. Pisaniello, and P. Bi. "Workers' Perceptions of Climate Change Related Extreme Heat Exposure in South Australia: A Cross-Sectional Survey." *BMC Public Health* 16, no. 1 (Jul 11 2016): 549.
- Yuen, E., S. S. Jovicich, and B. L. Preston. "Climate Change Vulnerability Assessments as Catalysts for Social Learning: Four Case Studies in South-Eastern Australia." [In English]. *Mitigation and Adaptation Strategies for Global Change* 18, no. 5 (2013): 567-90.
- Zander, K. K., S. A. Moss, and S. T. Garnett. "Drivers of Self-Reported Heat Stress in the Australian Labour Force." *Environmental Research* 152 (Jan 2017): 272-79.
- Zander, K. K., L. Petheram, and S. T. Garnett. "Stay or Leave? Potential Climate Change Adaptation Strategies among Aboriginal People in Coastal Communities in Northern Australia." [In English]. *Natural Hazards* 67, no. 2 (2013): 591-609.
- Zheng, B., K. Chenu, and S. C. Chapman. "Velocity of Temperature and Flowering Time in Wheat - Assisting Breeders to Keep Pace with Climate Change." *Global Change Biology* 22, no. 2 (Feb 2016): 921-33.
- Zografos, C., I. Anguelovski, and M. Grigorova. "When Exposure to Climate Change Is Not Enough: Exploring Heatwave Adaptive Capacity of a Multi-Ethnic, Low-Income Urban Community in Australia." *Urban Climate* 17 (2016): 248-65.

## Supplement 2: Articles excluded from analysis (n=962)

- Abbott, I., and D. Le Maitre. "Monitoring the Impact of Climate Change on Biodiversity: The Challenge of Megadiverse Mediterranean Climate Ecosystems." [In English]. *Austral Ecology* 35, no. 4 (2010): 406-22.
- Adam, D., S. D. Johnston, L. Beard, V. Nicholson, A. Lisle, J. Gaughan, R. Larkin, *et al.* "Surgical Implantation of Temperature-Sensitive Transmitters and Data-Loggers to Record Body Temperature in Koalas (*Phascolarctos Cinereus*)." *Australian Veterinary Journal* 94, no. 1-2 (Jan-Feb 2016): 42-47.
- Adams, M. A. "Mega-Fires, Tipping Points and Ecosystem Services: Managing Forests and Woodlands in an Uncertain Future." [In English]. *Forest Ecology and Management* 294 (2013): 250-61.
- Adamson, D., and A. Loch. "Possible Negative Feedbacks from 'Gold-Plating' Irrigation Infrastructure." [In English]. *Agricultural Water Management* 145 (2014): 134-44.
- . "Achieving Environmental Flows Where Buyback Is Constrained." *Australian Journal of Agricultural and Resource Economics* 62, no. 1 (2018): 83-102.
- Aggs, R. "Soil News - the Soil Carbon and Climate Policy Journey in Australia and the Role of Different Media." Paper presented at the IOP Conference Series: Earth and Environmental Science, 2015.
- Ahrens, C. W., and E. A. James. "Regional Genetic Structure and Environmental Variables Influence Our Conservation Approach for Feather Heads (*Ptilotus Macrocephalus*)." *Journal of Heredity* 107, no. 3 (May 2016): 238-47.
- Akompab, D. A., P. Bi, S. Williams, A. Saniotis, I. A. Walker, and M. Augoustinos. "Engaging Stakeholders in an Adaptation Process: Governance and Institutional Arrangements in Heat-Health Policy Development in Adelaide, Australia." [In English]. *Mitigation and Adaptation Strategies for Global Change* 18, no. 7 (2013): 1001-18.
- Alamgir, M., P. L. Pert, and S. M. Turton. "A Review of Ecosystem Services Research in Australia Reveals a Gap in Integrating Climate Change and Impacts on Ecosystem Services." [In English]. *International Journal of Biodiversity Science, Ecosystems Services and Management* 10, no. 2 (2014): 112-27.
- Allan, C., J. Xia, and C. Pahl-Wostl. "Climate Change and Water Security: Challenges for Adaptive Water Management." [In English]. *Current Opinion in Environmental Sustainability* 5, no. 6 (2013): 625-32.
- Allan, R., G. Endfield, V. Damodaran, G. Adamson, M. Hannaford, F. Carroll, N. Macdonald, *et al.* "Toward Integrated Historical Climate Research: The Example of Atmospheric Circulation Reconstructions over the Earth." *Wiley Interdisciplinary Reviews: Climate Change* 7, no. 2 (2016): 164-74.
- Alonso, A. D., and J. Northcote. "Climate, Vulnerability and Farming: A Preliminary Study among Australian Food Growers." [In English]. *International Journal of Sustainable Society* 6, no. 4 (2014): 376-96.
- Alston, M. "Rural Male Suicide in Australia." [In English]. *Social Science and Medicine* 74, no. 4 (2012): 515-22.
- Anderson, A. S., A. E. Reside, J. J. Vanderwal, L. P. Shoo, R. G. Pearson, and S. E. Williams. "Immigrants and Refugees: The Importance of Dispersal in Mediating Biotic Attrition under Climate Change." [In English]. *Global Change Biology* 18, no. 7 (2012): 2126-34.
- Andrew, M. E., and H. Warrener. "Detecting Microrefugia in Semi-Arid Landscapes from Remotely Sensed Vegetation Dynamics." *Remote Sensing of Environment* 200 (2017): 114-24.
- Andrew, N. R., R. A. Hart, M. P. Jung, Z. Hemmings, and J. S. Terblanche. "Can Temperate Insects

- Take the Heat? A Case Study of the Physiological and Behavioural Responses in a Common Ant, *Iridomyrmex Purpureus* (Formicidae), with Potential Climate Change." [In English]. *Journal of Insect Physiology* 59, no. 9 (2013): 870-80.
- Andrew, N. R., R. A. Hart, and J. S. Terblanche. "Limited Plasticity of Low Temperature Tolerance in an Australian Cantharid Beetle *Chauliognathus Lugubris*." [In English]. *Physiological Entomology* 36, no. 4 (2011): 385-91.
- Andrew, S. C., and D. J. Kemp. "Stress Tolerance in a Novel System: Genetic and Environmental Sources of (Co)Variation for Cold Tolerance in the Butterfly *Eurema Smilax*." *Austral Ecology* 41, no. 5 (2016): 529-37.
- Antón, J., A. Cattaneo, S. Kimura, and J. Lankoski. "Agricultural Risk Management Policies under Climate Uncertainty." *Global Environmental Change* 23, no. 6 (2013): 1726-36.
- Anwar, M. R., D. L. Liu, R. Farquharson, I. Macadam, A. Abadi, J. Finlayson, B. Wang, and T. Ramilan. "Climate Change Impacts on Phenology and Yields of Five Broadacre Crops at Four Climatologically Distinct Locations in Australia." *Agricultural Systems* 132 (2015): 133-44.
- Ashiabor, H., and P. Blazey. "Phasing out Detrimental Ecological Subsidies in the Fossil Fuel Sector: Challenges and Prospects for the Asia Pacific Region." [In English]. *Asia Pacific Journal of Environmental Law* 10, no. 3-4 (2007): 211-52.
- Aspinwall, M. J., A. Varhammar, C. J. Blackman, M. G. Tjoelker, C. Ahrens, M. Byrne, D. T. Tissue, and P. D. Rymer. "Adaptation and Acclimation Both Influence Photosynthetic and Respiratory Temperature Responses in *Corymbia Calophylla*." *Tree Physiology* 37, no. 8 (Aug 1 2017): 1095-112.
- Asseng, S., I. Foster, and N. C. Turner. "The Impact of Temperature Variability on Wheat Yields." [In English]. *Global Change Biology* 17, no. 2 (2011): 997-1012.
- Asseng, S., and D. J. Pannell. "Adapting Dryland Agriculture to Climate Change: Farming Implications and Research and Development Needs in Western Australia." [In English]. *Climatic Change* 118, no. 2 (2013): 167-81.
- Auld, T. D., and D. A. Keith. "Dealing with Threats: Integrating Science and Management." [In English]. *Ecological Management and Restoration* 10, no. SUPPL. 1 (2009): S79-S87.
- Austin, E. K., A. S. Kiem, and D. C. Verdon-Kidd. "Bridging the Gap between Climate Science Capability and Water Resource Management." Paper presented at the Proceedings of the 34th Hydrology and Water Resources Symposium, HWRS 2012, 2012.
- Bailey, I. "Spatializing Climate Justice: Justice Claim Making and Carbon Pricing Controversies in Australia." *Annals of the American Association of Geographers* 107, no. 5 (2017): 1128-43.
- Baker, I., A. Peterson, G. Brown, and C. McAlpine. "Local Government Response to the Impacts of Climate Change: An Evaluation of Local Climate Adaptation Plans." [In English]. *Landscape and Urban Planning* 107, no. 2 (2012): 127-36.
- Balcombe, S. R., F. Sheldon, S. J. Capon, N. R. Bond, W. L. Hadwen, N. Marsh, and S. J. Bernays. "Climate-Change Threats to Native Fish in Degraded Rivers and Floodplains of the Murraydarling Basin, Australia." [In English]. *Marine and Freshwater Research* 62, no. 9 (2011): 1099-114.
- Baldock, J. A., I. Wheeler, N. McKenzie, and A. McBratney. "Soils and Climate Change: Potential Impacts on Carbon Stocks and Greenhouse Gas Emissions, and Future Research for Australian Agriculture." [In English]. *Crop and Pasture Science* 63, no. 3 (2012): 269-83.
- Ban, N. C., R. L. Pressey, and S. Weeks. "Conservation Objectives and Sea-Surface Temperature Anomalies in the Great Barrier Reef." [In English]. *Conservation Biology* 26, no. 5 (2012): 799-809.

- Ban, S. S., R. L. Pressey, and N. A. J. Graham. "Assessing Interactions of Multiple Stressors When Data Are Limited: A Bayesian Belief Network Applied to Coral Reefs." [In English]. *Global Environmental Change* 27, no. 1 (2014): 64-72.
- Bandara, J. S., and Y. Cai. "The Impact of Climate Change on Food Crop Productivity, Food Prices and Food Security in South Asia." [In English]. *Economic Analysis and Policy* 44, no. 4 (2014): 451-65.
- Banks, S. C., I. D. Davies, and G. J. Cary. "When Can Refuges Mediate the Genetic Effects of Fire Regimes? A Simulation Study of the Effects of Topography and Weather on Neutral and Adaptive Genetic Diversity in Fire-Prone Landscapes." *Molecular Ecology* 26, no. 19 (Oct 2017): 4935-54.
- Banks, S. C., E. J. Knight, L. McBurney, D. Blair, and D. B. Lindenmayer. "The Effects of Wildfire on Mortality and Resources for an Arboreal Marsupial: Resilience to Fire Events but Susceptibility to Fire Regime Change." [In English]. *PLoS ONE* 6, no. 8 (2011).
- Bannister-Tyrrell, M., C. Williams, S. A. Ritchie, G. Rau, J. Lindesay, G. Mercer, and D. Harley. "Weather-Driven Variation in Dengue Activity in Australia Examined Using a Process-Based Modeling Approach." [In English]. *American Journal of Tropical Medicine and Hygiene* 88, no. 1 (2013): 65-72.
- Bardsley, D. K. "Limits to Adaptation or a Second Modernity? Responses to Climate Change Risk in the Context of Failing Socio-Ecosystems." [In English]. *Environment, Development and Sustainability* 17, no. 1 (2014): 41-55.
- Bardsley, D. K., and P. Pech. "Defining Spaces of Resilience within the Neoliberal Paradigm: Could French Land Use Classifications Guide Support for Risk Management within an Australian Regional Context?" [In English]. *Human Ecology* 40, no. 1 (2012): 129-43.
- Barnett, G., R. M. Beaty, J. Meyers, D. Chen, and S. McFallan. "Pathways for Adaptation of Low-Income Housing to Extreme Heat." In *Applied Studies in Climate Adaptation*, 364-71, 2014.
- Barnett, J., and J. P. Palutikof. "The Limits to Adaptation: A Comparative Analysis." In *Applied Studies in Climate Adaptation*, 231-40, 2014.
- Barron, O., R. Froend, G. Hodgson, R. Ali, W. Dawes, P. Davies, and D. McFarlane. "Projected Risks to Groundwater-Dependent Terrestrial Vegetation Caused by Changing Climate and Groundwater Abstraction in the Central Perth Basin, Western Australia." [In English]. *Hydrological Processes* 28, no. 22 (2013): 5513-29.
- Bartra, A. L. M. "It's Now or Never: The Importance in Raising Ecological Conscious Awareness of the World's Climate Change." In *Meltdown: Climate Change, Natural Disasters and Other Catastrophes - Fears and Concerns of the Future*, 373-92, 2009.
- Bates, L. E., M. Green, R. Leonard, and I. Walker. "The Influence of Forums and Multilevel Governance on the Climate Adaptation Practices of Australian Organizations." [In English]. *Ecology and Society* 18, no. 4 (2013).
- Battaglia, M., and J. Bruce. "Direct Climate Change Impacts on Growth and Drought Risk in Blue Gum (Eucalyptus Globulus) Plantations in Australia." *Australian Forestry* 80, no. 4 (2017): 216-27.
- Baumber, A., J. Merson, P. Ampt, and M. Diesendorf. "The Adoption of Short-Rotation Energy Cropping as a New Land Use Option in the New South Wales Central West." [In English]. *Rural Society* 20, no. 3 (2011): 266-79.
- Baynes, T., and S. Heckbert. "Micro-Scale Simulation of the Macro Urban Form: Opportunities for Exploring Urban Change and Adaptation." In *10th International Workshop on Multi-Agent-Based Simulation, MABS 2009*, 14-24. Budapest, 2010.
- Beal, C. D., E. Bertone, and R. A. Stewart. "Evaluating the Energy and Carbon Reductions Resulting

- from Resource-Efficient Household Stock." [In English]. *Energy and Buildings* 55 (2012): 422-32.
- Beaumont, L. J., R. V. Gallagher, P. O. Downey, W. Thuiller, M. R. Leishman, and L. Hughes. "Modelling the Impact of Hieracium Spp. On Protected Areas in Australia under Future Climates." [In English]. *Ecography* 32, no. 5 (2009): 757-64.
- Beck, H. J., D. A. Feary, Y. Nakamura, and D. J. Booth. "Wave-Sheltered Embayments Are Recruitment Hotspots for Tropical Fishes on Temperate Reefs." *Marine Ecology Progress Series* 546 (2016): 197-212.
- Beeden, R., J. A. Maynard, P. A. Marshall, S. F. Heron, and B. L. Willis. "A Framework for Responding to Coral Disease Outbreaks That Facilitates Adaptive Management." [In English]. *Environmental Management* 49, no. 1 (2012): 1-13.
- Beeden, R. J., M. A. Turner, J. Dryden, F. Merida, K. Goudkamp, C. Malone, P. A. Marshall, A. Birtles, and J. A. Maynard. "Rapid Survey Protocol That Provides Dynamic Information on Reef Condition to Managers of the Great Barrier Reef." *Environmental Monitoring and Assessment* 186, no. 12 (Dec 2014): 8527-40.
- Beer, A., S. Tually, M. Kroehn, J. Martin, R. Gerritsen, M. Taylor, M. Graymore, and J. Law. "Climate Change and the Future of Australia's Country Towns." In *Applied Studies in Climate Adaptation*, 332-41, 2014.
- Beggs, P. J., and C. M. Bennett. "Climate Change, Aeroallergens, Natural Particulates, and Human Health in Australia: State of the Science and Policy." [In English]. *Asia-Pacific Journal of Public Health* 23, no. 2 SUPPL. (2011): 46S-53S.
- Beheregaray, L. B., L. V. Pfeiffer, C. R. M. Attard, J. Sandoval-Castillo, F. M. C. B. Domingos, L. K. Faulks, D. M. Gilligan, and P. J. Unmack. "Genome-Wide Data Delimits Multiple Climate-Determined Species Ranges in a Widespread Australian Fish, the Golden Perch (*Macquaria Ambigua*)." *Molecular Phylogenetics and Evolution* 111 (Jun 2017): 65-75.
- Bell, E. J., P. Turner, H. Meinke, and N. J. Holbrook. "Developing Rural Community Health Risk Assessments for Climate Change: A Tasmanian Pilot Study." *Rural and remote health* 15, no. 3 (Jul-Sep 2015): 3174.
- Bell, M. J., R. J. Eckard, and B. R. Cullen. "The Effect of Future Climate Scenarios on the Balance between Productivity and Greenhouse Gas Emissions from Sheep Grazing Systems." [In English]. *Livestock Science* 147, no. 1-3 (2012): 126-38.
- Ben Salem, H., H. C. Norman, A. Nefzaoui, D. E. Mayberry, K. L. Pearce, and D. K. Revell. "Potential Use of Oldman Saltbush (*Atriplex Nummularia* Lindl.) in Sheep and Goat Feeding." [In English]. *Small Ruminant Research* 91, no. 1 (2010): 13-28.
- Benheim, D., S. Rochfort, E. Robertson, I. D. Potter, and K. S. Powell. "Grape Phylloxera (*Daktulosphaira Vitifoliae*) - a Review of Potential Detection and Alternative Management Options." [In English]. *Annals of Applied Biology* 161, no. 2 (2012): 91-115.
- Bentley, M. "Adapting to Climate Change in a Way That Promotes Social Equity and Health: An Examination of South Australia's Tackling Climate Change Strategy." In *International Journal of Environmental, Cultural, Economic and Social Sustainability*, 151-69, 2011.
- Berger, J. D. "Ecogeographic and Evolutionary Approaches to Improving Adaptation of Autumn-Sown Chickpea (*Cicer Arietinum* L.) to Terminal Drought: The Search for Reproductive Chilling Tolerance." [In English]. *Field Crops Research* 104, no. 1-3 (2007): 112-22.
- Berger, J. D., S. P. Milroy, N. C. Turner, K. H. M. Siddique, M. Imtiaz, and R. Malhotra. "Chickpea Evolution Has Selected for Contrasting Phenological Mechanisms among Different Habitats." [In English]. *Euphytica* 180, no. 1 (2011): 1-15.

- Berkelmans, R., and M. J. H. Van Oppen. "The Role of Zooxanthellae in the Thermal Tolerance of Corals: A 'Nugget of Hope' for Coral Reefs in an Era of Climate Change." [In English]. *Proceedings of the Royal Society B: Biological Sciences* 273, no. 1599 (2006): 2305-12.
- Berkhout, B. W., M. M. Lloyd, R. Poulin, and A. Studer. "Variation among Genotypes in Responses to Increasing Temperature in a Marine Parasite: Evolutionary Potential in the Face of Global Warming?". *International Journal for Parasitology* 44, no. 13 (Nov 2014): 1019-27.
- Berry, A. J., S. Fahey, and N. Meyers. "Sandy Beaches as Dynamic Refugia: Potential Barriers to Shoreline Retreat on the Sunshine Coast, Queensland, Australia." [In English]. *Ocean and Coastal Management* 102, no. PA (2014): 32-39.
- Berumen, M. L., A. S. Hoey, W. H. Bass, J. Bouwmeester, D. Catania, J. E. M. Cochran, M. T. Khalil, et al. "The Status of Coral Reef Ecology Research in the Red Sea." [In English]. *Coral Reefs* 32, no. 3 (2013): 737-48.
- Bessell-Browne, P., M. Stat, D. Thomson, and P. L. Clode. "Coscinaraea Marshae Corals That Have Survived Prolonged Bleaching Exhibit Signs of Increased Heterotrophic Feeding." [In English]. *Coral Reefs* 33, no. 3 (2014): 795-804.
- Bettini, Y., R. Brown, and F. J. De Haan. "Water Scarcity and Institutional Change: Lessons in Adaptive Governance from the Drought Experience of Perth, Western Australia." [In English]. *Water Science and Technology* 67, no. 10 (2013): 2160-68.
- Bevege, D. I. "The Maxwell Ralph Jacobs Memorial Oration 2009: The Challenge of Change in a Climate of Uncertainty: Looking Back to the Future through the Prism of Max Jacobs' Forestry Career." *Australian Forestry* 73, no. 3 (2010): 140-55.
- Bi, P., and K. A. Parton. "Effect of Climate Change on Australian Rural and Remote Regions: What Do We Know and What Do We Need to Know?" [In English]. *Australian Journal of Rural Health* 16, no. 1 (2008): 2-4.
- Biggs, D., C. C. Hicks, J. E. Cinner, and C. M. Hall. "Marine Tourism in the Face of Global Change: The Resilience of Enterprises to Crises in Thailand and Australia." *Ocean and Coastal Management* 105 (2015): 65-74.
- Biggs, J. S., P. J. Thorburn, S. Crimp, B. Masters, and S. J. Attard. "Interactions between Climate Change and Sugarcane Management Systems for Improving Water Quality Leaving Farms in the Mackay Whitsunday Region, Australia." [In English]. *Agriculture, Ecosystems and Environment* 180 (2013): 79-89.
- Bishop, J., Y. Ye, and D. A. Milton. "What Are the Effects of Climate on the Offshore and Onshore Movements of Adult Grooved Tiger Prawns *Penaeus Semisulcatus* in Tropical Northern Australia?". *Fisheries Oceanography* 25, no. 4 (2016): 349-61.
- Blaber, S. J. M. "Fishes and Fisheries in Tropical Estuaries: The Last 10 Years." [In English]. *Estuarine, Coastal and Shelf Science* 135 (2013): 57-65.
- Blackwell, B. D., M. Raybould, and N. Lazarow. "Beaches as Societal Assets: Council Expenditures, Recreational Returns, and Climate Change." In *Handbook of Tourism Economics: Analysis, New Applications and Case Studies*, 443-67, 2013.
- Bonada, N., and V. H. Resh. "Mediterranean-Climate Streams and Rivers: Geographically Separated but Ecologically Comparable Freshwater Systems." *Hydrobiologia* 719, no. 1 (2013): 1-29.
- Bond, M. "Localizing Climate Change: Stepping up Local Climate Action." [In English]. *Management of Environmental Quality* 21, no. 2 (2010): 214-25.
- Bond, N. R., J. R. Thomson, and P. Reich. "Incorporating Climate Change in Conservation Planning for Freshwater Fishes." [In English]. *Diversity and Distributions* 20, no. 8 (2014): 931-42.
- Bone, J. W. P., G. M. C. Renshaw, J. M. Furse, and C. H. Wild. "Using Biochemical Markers to Assess

- the Effects of Imposed Temperature Stress on Freshwater Decapod Crustaceans: *Cherax Quadricarinatus* as a Test Case." *Journal of Comparative Physiology B: Biochemical, Systemic, and Environmental Physiology* 185, no. 3 (Apr 2015): 291-301.
- Bonell, M. "The Impacts of Global Change in the Humid Tropics: Selected Rainfall-Runoff Issues Linked with Tropical Forest-Land Management." [In English]. *Irrigation and Drainage Systems* 24, no. 3-4 (2010): 279-325.
- Boon, H. J. "Disaster Resilience in a Flood-Impacted Rural Australian Town." [In English]. *Natural Hazards* 71, no. 1 (2014): 683-701.
- Boon, H. J., L. H. Brown, K. Tsey, R. Speare, P. Pagliano, K. Usher, and B. Clark. "School Disaster Planning for Children with Disabilities a Critical Review of the Literature." [In English]. *International Journal of Special Education* 26, no. 3 (2011): 223-37.
- Booth, K., and S. Williams. "Is Insurance an under-Utilised Mechanism in Climate Change Adaptation? The Case of Bushfire Management in Tasmania." [In English]. *Australian Journal of Emergency Management* 27, no. 4 (2012): 38-45.
- Booth, T. H. "Biodiversity and Climate Change Adaptation in Australia: Strategy and Research Developments." [In English]. *Advances in Climate Change Research* 3, no. 1 (2012): 12-21.
- . "Using Biodiversity Databases to Verify and Improve Descriptions of Tree Species Climatic Requirements." [In English]. *Forest Ecology and Management* 315 (2014): 95-102.
- . "Impacts of Climate Change on Eucalypt Distributions in Australia: An Examination of a Recent Study." *Australian Forestry* 80, no. 4 (2017): 208-15.
- Booth, T. H., L. M. Broadhurst, E. Pinkard, S. M. Prober, S. K. Dillon, D. Bush, K. Pinyopusarerk, *et al.* "Native Forests and Climate Change: Lessons from Eucalypts." *Forest Ecology and Management* 347 (2015): 18-29.
- Booth, T. H., T. Jovanovic, N. S. Ho, and C. Miller. "A Systematic Regional Approach for Climate Change Adaptation to Protect Biodiversity." [In English]. *Climatic Change* 117, no. 4 (2013): 757-68.
- Booth, T. H., and K. J. Williams. "Developing Biodiverse Plantings Suitable for Changing Climatic Conditions 1: Underpinning Scientific Methods." [In English]. *Ecological Management and Restoration* 13, no. 3 (2012): 267-73.
- Borodina, A., E. M. Fischer, and R. Knutti. "Potential to Constrain Projections of Hot Temperature Extremes." *Journal of Climate* 30, no. 24 (2017): 9949-64.
- Botterill, L. C., and S. Dovers. "Drought and Water in the Murray–Darling Basin: From Disaster Policy to Adaptation." In *Natural Disasters and Adaptation to Climate Change*, 67-74: Cambridge University Press, 2008.
- Bourgault, M., J. Brand, M. Tausz, and G. J. Fitzgerald. "Yield, Growth and Grain Nitrogen Response to Elevated CO<sub>2</sub> of Five Field Pea (*Pisum Sativum* L.) Cultivars in a Low Rainfall Environment." *Field Crops Research* 196 (2016): 1-9.
- Bowker, D. G. "The Australian Electricity System - Sustaining the Future." Paper presented at the CIGRE International Symposium Guilin 2009: Operation and Development of Power System in the New Context, Guilin City, Guangxi Province, 2009.
- Bradbury, D., A. Smithson, and S. L. Krauss. "Signatures of Diversifying Selection at Est-Ssr Loci and Association with Climate in Natural Eucalyptus Populations." [In English]. *Molecular Ecology* 22, no. 20 (2013): 5112-29.
- Bradbury, D., S. L. Tapper, D. Coates, M. Hankinson, S. McArthur, and M. Byrne. "How Does the Post-Fire Facultative Seeding Strategy Impact Genetic Variation and Phylogeographical History? The Case of *Bossiaea Ornata* (Fabaceae) in a Fire-Prone, Mediterranean-Climate Ecosystem."

- Journal of Biogeography* 43, no. 1 (2016): 96-110.
- Bradshaw, D. "Ecophysiology and Conservation of Wildlife in Western Australia." [In English]. *Journal of the Royal Society of Western Australia* 93, no. 3 (2010): 153-64.
- Brauer, C. J., M. P. Hammer, and L. B. Beheregaray. "Riverscape Genomics of a Threatened Fish across a Hydroclimatically Heterogeneous River Basin." *Molecular Ecology* 25, no. 20 (Oct 2016): 5093-113.
- Brauer, C. J., P. J. Unmack, and L. B. Beheregaray. "Comparative Ecological Transcriptomics and the Contribution of Gene Expression to the Evolutionary Potential of a Threatened Fish." *Molecular Ecology* 26, no. 24 (Dec 2017): 6841-56.
- Breed, M. F., N. J. C. Gellie, and A. J. Lowe. "Height Differences in Two Eucalypt Provenances with Contrasting Levels of Aridity." *Restoration Ecology* 24, no. 4 (2016): 471-78.
- Breuer, Lutz, and Klaus Butterbach-Bahl. "Local Temperature Optimum of N<sub>2</sub>O Production Rates in Tropical Rain Forest Soils of Australia." *Australian Journal of Soil Research* 43, no. 6 (2005): 689-94.
- Briscoe, N. J., A. Krockenberger, K. A. Handasyde, and M. R. Kearney. "Bergmann Meets Scholander: Geographical Variation in Body Size and Insulation in the Koala Is Related to Climate." *Journal of Biogeography* 42, no. 4 (2015): 791-802.
- Broad, K. C., R. J. Sneath, and T. M. J. Emery. "Use of Business Analysis in Beef Businesses to Direct Management Practice Change for Climate Adaptation Outcomes." *Rangeland Journal* 38, no. 3 (2016): 273-82.
- Broadhurst, L., S. Prober, F. Dickson, and D. Bush. "Using Restoration as an Experimental Framework to Test Provenancing Strategies and Climate Adaptability." *Ecological Management and Restoration* 18, no. 3 (2017): 205-08.
- Broadhurst, L. M. "A Genetic Analysis of Scattered Yellow Box Trees (*Eucalyptus Melliodora* A.Cunn. Ex Schauer, Myrtaceae) and Their Restored Cohorts." [In English]. *Biological Conservation* 161 (2013): 48-57.
- Broadhurst, L. M., R. Mellick, N. Knerr, L. Li, and M. A. Supple. "Land Availability May Be More Important Than Genetic Diversity in the Range Shift Response of a Widely Distributed Eucalypt, *Eucalyptus Melliodora*." *Forest Ecology and Management* 409 (2018): 38-46.
- Brouwers, N. C., R. Van Dongen, G. Matusick, N. C. Coops, G. Strelein, and G. Hardy. "Inferring Drought and Heat Sensitivity across a Mediterranean Forest Region in Southwest Western Australia: A Comparison of Approaches." *Forestry* 88, no. 4 (2015): 454-64.
- Brown, D. R., P. Dettmann, T. Rinaudo, H. Tefera, and A. Tofu. "Poverty Alleviation and Environmental Restoration Using the Clean Development Mechanism: A Case Study from Humbo, Ethiopia." [In English]. *Environmental Management* 48, no. 2 (2011): 322-33.
- Brown, H., and J. Spickett. "Health Consequence Scales for Use in Health Impact Assessments of Climate Change." [In English]. *International Journal of Environmental Research and Public Health* 11, no. 9 (Sep 16 2014): 9607-20.
- Brown, J. R., A. F. Moise, and R. A. Colman. "Projected Increases in Daily to Decadal Variability of Asian-Australian Monsoon Rainfall." *Geophysical Research Letters* 44, no. 11 (2017): 5683-90.
- Brown, T., and K. Yasukawa. "Learning and Adapting for Organisational Change: Researching Union Education in Australia." [In English]. *Studies in Continuing Education* 32, no. 1 (2010): 61-71.
- Bryan, B. A., D. King, and E. Wang. "Potential of Woody Biomass Production for Motivating Widespread Natural Resource Management under Climate Change." [In English]. *Land Use Policy* 27, no. 3 (2010): 713-25.
- Bryan, B. A., W. S. Meyer, C. A. Campbell, G. P. Harris, T. Lefroy, G. Lyle, P. Martin, *et al.* "The



- Second Industrial Transformation of Australian Landscapes." [In English]. *Current Opinion in Environmental Sustainability* 5, no. 3-4 (2013): 278-87.
- Buckeridge, J. S. "Some Biological Consequences of Environmental Change: A Study Using Barnacles (Cirripedia: Balanomorpha) and Gum Trees (Angiospermae: Myrtaceae)." [In English]. *Integrative Zoology* 5, no. 2 (2010): 122-31.
- Builth, H., A. P. Kershaw, C. White, A. Roach, L. Hartney, M. McKenzie, T. Lewis, and G. Jacobsen. "Environmental and Cultural Change on the Mt Eccles Lava-Flow Landscapes of Southwest Victoria, Australia." [In English]. *Holocene* 18, no. 3 (2008): 413-24.
- Buizer, M., and A. Lawrence. "The Politics of Numbers in Forest and Climate Change Policies in Australia and the Uk." [In English]. *Environmental Science and Policy* 35 (2014): 57-66.
- Bull, J. J. "Reptile Sex Determination Goes Wild." *Nature* 523, no. 7558 (Jul 2 2015): 43-44.
- Bull, J. K., C. J. Sands, R. C. Garrick, M. G. Gardner, N. N. Tait, D. A. Briscoe, D. M. Rowell, and P. Sunnucks. "Environmental Complexity and Biodiversity: The Multi-Layered Evolutionary History of a Log-Dwelling Velvet Worm in Montane Temperate Australia." [In English]. *PLoS ONE* 8, no. 12 (2013).
- Bunker, R., and G. Searle. "Seeking Certainly: Recent Planning for Sydney and Melbourne." [In English]. *Town Planning Review* 78, no. 5 (2007): 619-42.
- Buranatrakul, T., and F. W. Swierczek. "Climate Change Strategic Actions in the International Banking Industry." *Global Business Review* 19, no. 1 (2018): 32-47.
- Burgess, S. C., and D. J. Marshall. "Temperature-Induced Maternal Effects and Environmental Predictability." [In English]. *Journal of Experimental Biology* 214, no. 14 (2011): 2329-36.
- Burton, P., and J. Mustelin. "Planning for Climate Change: Is Greater Public Participation the Key to Success?" [In English]. *Urban Policy and Research* 31, no. 4 (2013): 399-415.
- Bush, A., R. A. Catullo, K. Mokany, A. H. Thornhill, J. T. Miller, and S. Ferrier. "Truncation of Thermal Tolerance Niches among Australian Plants." *Global Ecology and Biogeography* 27, no. 1 (2018): 22-31.
- Bush, A., D. Nipperess, E. Turak, and L. Hughes. "Determining Vulnerability of Stream Communities to Climate Change at the Landscape Scale." [In English]. *Freshwater Biology* 57, no. 8 (2012): 1689-701.
- Bush, A., G. Theischinger, D. Nipperess, E. Turak, and L. Hughes. "Dragonflies: Climate Canaries for River Management." [In English]. *Diversity and Distributions* 19, no. 1 (2013): 86-97.
- Bush, A. A., D. A. Nipperess, D. E. Duursma, G. Theischinger, E. Turak, and L. Hughes. "Continental-Scale Assessment of Risk to the Australian Odonata from Climate Change." [In English]. *PLoS ONE* 9, no. 2 (2014): e88958.
- Butler, J. R. A., W. Suadnya, K. Puspadi, Y. Sutaryono, R. M. Wise, T. D. Skewes, D. Kirono, *et al.* "Framing the Application of Adaptation Pathways for Rural Livelihoods and Global Change in Eastern Indonesian Islands." [In English]. *Global Environmental Change* 28, no. 1 (2014): 368-82.
- Butler, J. R. A., A. Tawake, T. Skewes, L. Tawake, and V. McGrath. "Integrating Traditional Ecological Knowledge and Fisheries Management in the Torres Strait, Australia: The Catalytic Role of Turtles and Dugong as Cultural Keystone Species." [In English]. *Ecology and Society* 17, no. 4 (2012).
- Butler, R. "Taiwan Aspire Conference October 18-22 2009." [In English]. *Water* 37, no. 1 (2010): 41.
- Button, C., and N. Harvey. "Vulnerability and Adaptation to Climate Change on the South Australian Coast: A Coastal Community Perspective." *Transactions of the Royal Society of South Australia* 139, no. 1 (2015): 38-56.

- Byars, S. G., and A. A. Hoffmann. "Lack of Strong Local Adaptation in the Alpine Forb *Craspedia Lamicola* in Southeastern Australia." [In English]. *International Journal of Plant Sciences* 170, no. 7 (2009): 906-17.
- Byars, S. G., W. Papst, and A. A. Hoffmann. "Local Adaptation and Cogradient Selection in the Alpine Plant, *Poa Hiemata*, Along a Narrow Altitudinal Gradient." [In English]. *Evolution* 61, no. 12 (2007): 2925-41.
- Byars, S. G., Y. Parsons, and A. A. Hoffmann. "Effect of Altitude on the Genetic Structure of an Alpine Grass, *Poa Hiemata*." [In English]. *Annals of Botany* 103, no. 6 (2009): 885-99.
- Byrne, J., B. Gleeson, M. Howes, and W. Steele. "Climate Change and Australian Urban Resilience: The Limits of Ecological Modernization as an Adaptive Strategy." In *Planning for Climate Change: Strategies for Mitigation and Adaptation for Spatial Planners*, 136-54: Earthscan, 2009.
- Byrne, M., N. A. Soars, M. A. Ho, E. Wong, D. McElroy, P. Selvakumaraswamy, S. A. Dworjanyn, and A. R. Davis. "Fertilization in a Suite of Coastal Marine Invertebrates from Se Australia Is Robust to near-Future Ocean Warming and Acidification." [In English]. *Marine Biology* 157, no. 9 (2010): 2061-69.
- Cabrelli, A. L., A. J. Stow, and L. Hughes. "A Framework for Assessing the Vulnerability of Species to Climate Change: A Case Study of the Australian Elapid Snakes." [In English]. *Biodiversity and Conservation* 23, no. 12 (2014): 3019-34.
- Cacciapaglia, C., and R. van Woesik. "Reef-Coral Refugia in a Rapidly Changing Ocean." *Global Change Biology* 21, no. 6 (Jun 2015): 2272-82.
- Cadby, C. D., S. M. Jones, and E. Wapstra. "Geographical Differences in Maternal Basking Behaviour and Offspring Growth Rate in a Climatically Widespread Viviparous Reptile." [In English]. *Journal of Experimental Biology* 217, no. 7 (Apr 1 2014): 1175-79.
- Cairns, G., I. Ahmed, J. Mullett, and G. Wright. "Scenario Method and Stakeholder Engagement: Critical Reflections on a Climate Change Scenarios Case Study." [In English]. *Technological Forecasting and Social Change* 80, no. 1 (2013): 1-10.
- Calviño-Cancela, M., R. R. Dunn, E. J. B. Van Etten, and B. B. Lamont. "Emus as Non-Standard Seed Dispersers and Their Potential for Long-Distance Dispersal." [In English]. *Ecography* 29, no. 4 (2006): 632-40.
- Campbell, S. "Ecological Specialisation and Conservation of Australia's Large-Footed Myotis: A Review of Trawling Bat Behaviour." [In English]. *Australian Zoologist* 35, no. SPEC. ISSUE (2011): 72-85.
- Campbell-Tennant, D. J. E., J. L. Gardner, M. R. Kearney, and M. R. E. Symonds. "Climate-Related Spatial and Temporal Variation in Bill Morphology over the Past Century in Australian Parrots." *Journal of Biogeography* 42, no. 6 (2015): 1163-75.
- Cao, P. B., S. Azar, H. SanClemente, F. Mounet, C. Dunand, G. Marque, C. Marque, and C. Teulieères. "Genome-Wide Analysis of the Ap2/Erf Family in *Eucalyptus Grandis*: An Intriguing over-Representation of Stress-Responsive." *PLoS ONE* 10, no. 4 (2015): e0121041.
- Caprile, R. "Coastal Surveying Capabilities Tenix Lads Corporation." *Hydro International* 13, no. 3 (2009).
- Caputi, N., M. Kangas, A. Denham, M. Feng, A. Pearce, Y. Hetzel, and A. Chandrapavan. "Management Adaptation of Invertebrate Fisheries to an Extreme Marine Heat Wave Event at a Global Warming Hot Spot." *Ecology and Evolution* 6, no. 11 (Jun 2016): 3583-93.
- Carnie, T. L., H. L. Berry, S. A. Blinkhorn, and C. R. Hart. "In Their Own Words: Young People's Mental Health in Drought-Affected Rural and Remote Nsw." [In English]. *Australian Journal of Rural Health* 19, no. 5 (2011): 244-48.

- Carter, R. W., and H. Ross. "Tyrannies of Effective Monitoring and Evaluation." *Australasian Journal of Environmental Management* 20, no. 4 (2013): 263-69.
- Cechet, R. P., A. Sanabria, T. Yang, W. C. Arthur, C. H. Wang, and X. Wang. "An Assessment of Severe Wind Hazard and Risk for Queensland's Sunshine Coast Region." Paper presented at the 19th International Congress on Modelling and Simulation - Sustaining Our Future: Understanding and Living with Uncertainty, MODSIM2011, Perth, WA, 2011.
- Chakraborty, S., J. Luck, G. Hollaway, G. Fitzgerald, and N. White. "Rust-Proofing Wheat for a Changing Climate." [In English]. *Euphytica* 179, no. 1 (2011): 19-32.
- Chaloupka, M., N. Kamezaki, and C. Limpus. "Is Climate Change Affecting the Population Dynamics of the Endangered Pacific Loggerhead Sea Turtle?" [In English]. *Journal of Experimental Marine Biology and Ecology* 356, no. 1-2 (2008): 136-43.
- Chambers, L. E., R. Altwegg, C. Barbraud, P. Barnard, L. J. Beaumont, R. J. M. Crawford, J. M. Durant, et al. "Phenological Changes in the Southern Hemisphere." [In English]. *PLoS ONE* 8, no. 10 (2013).
- Chambers, L. E., P. Barnard, E. S. Poloczanska, A. J. Hobday, M. R. Keatley, N. Allsopp, and L. G. Underhill. "Southern Hemisphere Biodiversity and Global Change: Data Gaps and Strategies." *Austral Ecology* 42, no. 1 (2017): 20-30.
- Chambers, L. E., P. Dann, B. Cannell, and E. J. Woehler. "Climate as a Driver of Phenological Change in Southern Seabirds." *International Journal of Biometeorology* 58, no. 4 (May 2014): 603-12.
- Chambers, L. E., C. A. Devney, B. C. Congdon, N. Dunlop, E. J. Woehler, and P. Dann. "Observed and Predicted Effects of Climate on Australian Seabirds." [In English]. *Emu* 111, no. 3 (2011): 235-51.
- Chambers, L. E., L. Hughes, and M. A. Weston. "Climate Change and Its Impact on Australia's Avifauna." [In English]. *Emu* 105, no. 1 (2005): 1-20.
- Chan, Y. L., D. Schanzenbach, and M. J. Hickerson. "Detecting Concerted Demographic Response across Community Assemblages Using Hierarchical Approximate Bayesian Computation." *Molecular Biology and Evolution* 31, no. 9 (Sep 2014): 2501-15.
- Chapman, S. C., S. Chakraborty, M. F. Dreccer, and S. M. Howden. "Plant Adaptation to Climate Change Opportunities and Priorities in Breeding." [In English]. *Crop and Pasture Science* 63, no. 3 (2012): 251-68.
- Chappon, C., C. Le Bris, and L. Seuront. "Thermally Mediated Body Temperature, Water Content and Aggregation Behaviour in the Intertidal Gastropod *Nerita atramentosa*." [In English]. *Ecological Research* 28, no. 3 (2013): 407-16.
- Charlier, J., A. H. Ghebretinsae, B. Levecke, E. Ducheyne, E. Claerebout, and J. Vercruyse. "Climate-Driven Longitudinal Trends in Pasture-Borne Helminth Infections of Dairy Cattle." *International Journal for Parasitology* 46, no. 13-14 (Dec 2016): 881-88.
- Chen, C., A. Smith, P. Ward, A. Fletcher, R. Lawes, and H. Norman. "Modelling the Comparative Growth, Water Use and Productivity of the Perennial Legumes, Teder (Bituminaria Bituminosa Var. Albomarginata) and Lucerne (Medicago Sativa) in Dryland Mixed Farming Systems." *Crop and Pasture Science* 68, no. 7 (2017): 643-56.
- Chen, Y., D. Barrett, R. Liu, L. Gao, M. Zhou, L. Renzullo, S. Cuddy, and I. Emelyanova. "A Spatial Framework for Regional-Scale Flooding Risk Assessment." Paper presented at the 7th International Congress on Environmental Modelling and Software, iEMSs 2014, 2014.
- Chester, E. T., A. D. Miller, I. Valenzuela, S. J. Wickson, and B. J. Robson. "Drought Survival Strategies, Dispersal Potential and Persistence of Invertebrate Species in an Intermittent Stream Landscape." *Freshwater Biology* 60, no. 10 (2015): 2066-83.

- Chiew, F. H. S., I. P. Prosser, and D. A. Post. "On Climate Variability and Climate Change and Impact on Water Resources." Paper presented at the 19th International Congress on Modelling and Simulation - Sustaining Our Future: Understanding and Living with Uncertainty, MODSIM2011, Perth, WA, 2011.
- Chin, A., P. M. Kyne, T. I. Walker, and R. B. McAuley. "An Integrated Risk Assessment for Climate Change: Analysing the Vulnerability of Sharks and Rays on Australia's Great Barrier Reef." [In English]. *Global Change Biology* 16, no. 7 (2010): 1936-53.
- Chirgwin, E., K. Monro, C. M. Sgrò, and D. J. Marshall. "Revealing Hidden Evolutionary Capacity to Cope with Global Change." *Global Change Biology* 21, no. 9 (Sep 2015): 3356-66.
- Chong, J. "Climate-Readiness, Competition and Sustainability: An Analysis of the Legal and Regulatory Frameworks for Providing Water Services in Sydney." [In English]. *Water Policy* 16, no. 1 (2014): 1-18.
- Chopard, J., M. Bader, E. J. Veneklaas, and M. Renton. "Impact of a Tree's Hydraulic Strategy on Its Survival in a Global Climate Change Context." Paper presented at the 19th International Congress on Modelling and Simulation - Sustaining Our Future: Understanding and Living with Uncertainty, MODSIM2011, Perth, WA, 2011.
- Chowdhury, R. K., S. Beecham, J. Boland, and J. Piantadosi. "Understanding South Australian Rainfall Trends and Step Changes." *International Journal of Climatology* 35, no. 3 (2015): 348-60.
- Christmas, M. J., E. Biffin, M. F. Breed, and A. J. Lowe. "Finding Needles in a Genomic Haystack: Targeted Capture Identifies Clear Signatures of Selection in a Nonmodel Plant Species." *Molecular ecology* 25, no. 17 (Sep 2016): 4216-33.
- Christoff, P. "A South Seas Carbon Bubble Australia and a near-Pacific Regional Climate Pact." [In English]. *Asia Pacific Journal of Environmental Law* 11, no. 1-2 (2008): 13-27.
- Christy, B., A. Weeks, G. O'Leary, and C. Beverly. "Separating the Impact of Climate Change from Land Use Change in Local and Regional Groundwater Systems." Paper presented at the 18th World IMACS Congress and International Congress on Modelling and Simulation: Interfacing Modelling and Simulation with Mathematical and Computational Sciences, MODSIM09, Cairns, QLD, 2009.
- Chui, S. C. K. "Visual Attractiveness Versus Water Conservation in Front Yard Preferences in the Context of Drought in Melbourne, Australia." [In English]. *Australian Journal of Water Resources* 18, no. 1 (2014): 85-97.
- Clapham, M. E., and N. P. James. "Regional-Scale Marine Faunal Change in Eastern Australia During Permian Climate Fluctuations and Its Relationship to Local Community Restructuring." *Palaios* 27, no. 9 (2012): 627-35.
- Clarke, H. "Strategic Issues in Global Climate Change Policy." [In English]. *Australian Journal of Agricultural and Resource Economics* 54, no. 2 (2010): 165-84.
- Clarke, J. M., P. H. Whetton, and K. J. Hennessy. "Providing Application-Specific Climate Projections Datasets: Csiro's Climate Futures Framework." Paper presented at the 19th International Congress on Modelling and Simulation - Sustaining Our Future: Understanding and Living with Uncertainty, MODSIM2011, Perth, WA, 2011.
- Clemson, A. S., C. M. Sgrò, and M. Telonis-Scott. "Thermal Plasticity in *Drosophila Melanogaster* Populations from Eastern Australia: Quantitative Traits to Transcripts." *Journal of Evolutionary Biology* 29, no. 12 (Dec 2016): 2447-63.
- Cochrane, A., G. L. Hoyle, C. J. Yates, T. Neeman, and A. B. Nicotra. "Variation in Plant Functional Traits across and within Four Species of Western Australian Banksia (Proteaceae) Along a Natural Climate Gradient." *Austral Ecology* 41, no. 8 (2016): 886-96.

- Coffey, B., and G. Wescott. "New Directions in Biodiversity Policy and Governance? A Critique of Victoria's Land and Biodiversity White Paper." [In English]. *Australasian Journal of Environmental Management* 17, no. 4 (2010): 204-14.
- Coleman, M. A., P. Cetina-Heredia, M. Roughan, M. Feng, E. van Sebille, and B. P. Kelaher. "Anticipating Changes to Future Connectivity within a Network of Marine Protected Areas." *Global Change Biology* 23, no. 9 (Sep 2017): 3533-42.
- Coletti, J. Z., C. Hinz, R. Vogwill, and M. R. Hipsey. "Hydrological Controls on Carbon Metabolism in Wetlands." [In English]. *Ecological Modelling* 249 (2013): 3-18.
- . "Hydrological Controls on Carbon Metabolism in Wetlands." *Ecological Modelling* 249 (2013): 3-18.
- Colleter, G., A. Van Staden, M. Blacka, and J. Louys. "Mackay Breakwater Adaptability." Paper presented at the 20th Australasian Coastal and Ocean Engineering Conference 2011, COASTS 2011 and the 13th Australasian Port and Harbour Conference 2011, PORTS 2011, Perth, WA, 2011.
- Colloff, M. J., and D. S. Baldwin. "Resilience of Floodplain Ecosystems in a Semi-Arid Environment." [In English]. *Rangeland Journal* 32, no. 3 (2010): 305-14.
- Colloff, M. J., M. D. Doherty, S. Lavorel, M. Dunlop, R. M. Wise, and S. M. Prober. "Adaptation Services and Pathways for the Management of Temperate Montane Forests under Transformational Climate Change." *Climatic Change* 138, no. 1-2 (2016): 267-82.
- Comte, A., and L. H. Pendleton. "Management Strategies for Coral Reefs and People under Global Environmental Change: 25 Years of Scientific Research." *Journal of Environmental Management* 209 (Mar 1 2018): 462-74.
- Conejos, S. "Optimisation of Future Building Adaptive Reuse Design Criteria for Urban Sustainability." *Journal of Design Research* 11, no. 3 (2013): 225-42.
- Conejos, S., C. Langston, and J. Smith. "Adaptstar Model: A Climate-Friendly Strategy to Promote Built Environment Sustainability." [In English]. *Habitat International* 37 (2013): 95-103.
- Conley, T., and E. van Acker. "Whatever Happened to Industry Policy in Australia?" [In English]. *Australian Journal of Political Science* 46, no. 3 (2011): 503-17.
- Connor, J. D., K. Schwabe, D. King, and K. Knapp. "Irrigated Agriculture and Climate Change: The Influence of Water Supply Variability and Salinity on Adaptation." *Ecological Economics* 77 (2012): 149-57.
- Cook, S., A. Sharma, and M. Chong. "Performance Analysis of a Communal Residential Rainwater System for Potable Supply: A Case Study in Brisbane, Australia." *Water Resources Management* 27, no. 14 (2013): 4865-76.
- Cosens, B., and B. C. Chaffin. "Adaptive Governance of Water Resources Shared with Indigenous Peoples: The Role of Law." *Water (Switzerland)* 8, no. 3 (2016).
- Cozzolino, D., W. U. Cynkar, R. G. Damberg, M. Gishen, and P. Smith. "Grape (*Vitis Vinifera*) Compositional Data Spanning Ten Successive Vintages in the Context of Abiotic Growing Parameters." [In English]. *Agriculture, Ecosystems and Environment* 139, no. 4 (2010): 565-70.
- Craig, R. K. "Ocean Governance for the 21st Century: Making Marine Zoning Climate Change Adaptable." *Harvard Environmental Law Review* 36, no. 2 (2012): 305-50.
- Crick, F., J. Wandel, N. Maclellan, and K. Vincent. "Climate Change Adaptation Pathways: Insights from Case Studies in South Africa, Canada and the Pacific Islands." In *Climate Adaptation Futures*, 242-53: John Wiley and Sons, 2013.
- Crimp, S. J., C. J. Stokes, S. M. Howden, A. D. Moore, B. Jacobs, P. R. Brown, A. J. Ash, P. Kokic, and P. Leith. "Managing Murray-Darling Basin Livestock Systems in a Variable and Changing

- Climate: Challenges and Opportunities." [In English]. *Rangeland Journal* 32, no. 3 (2010): 293-304.
- Crisp, M. D., and L. G. Cook. "Explosive Radiation or Cryptic Mass Extinction? Interpreting Signatures in Molecular Phylogenies." [In English]. *Evolution* 63, no. 9 (2009): 2257-65.
- Crossman, N. D., B. A. Bryan, and D. M. Summers. "Identifying Priority Areas for Reducing Species Vulnerability to Climate Change." [In English]. *Diversity and Distributions* 18, no. 1 (2012): 60-72.
- Cullen, B. R., and R. J. Eckard. "Impacts of Future Climate Scenarios on the Balance between Productivity and Total Greenhouse Gas Emissions from Pasture Based Dairy Systems in South-Eastern Australia." [In English]. *Animal Feed Science and Technology* 166-167 (2011): 721-35.
- Cullen, L. E., M. A. Adams, M. J. Anderson, and P. F. Grierson. "Analyses of  $\Delta^{13}C$  and  $\Delta^{18}O$  in Tree Rings of *Callitris Columellaris* Provide Evidence of a Change in Stomatal Control of Photosynthesis in Response to Regional Changes in Climate." [In English]. *Tree Physiology* 28, no. 10 (2008): 1525-33.
- Cure, K., J. P. A. Hobbs, T. J. Langlois, D. V. Fairclough, E. C. Thillainath, and E. S. Harvey. "Spatiotemporal Patterns of Abundance and Ecological Requirements of a Labrid's Juveniles Reveal Conditions for Establishment Success and Range Shift Capacity." *Journal of Experimental Marine Biology and Ecology* 500 (2018): 34-45.
- Cure, K., L. Thomas, J. P. A. Hobbs, D. V. Fairclough, and W. J. Kennington. "Genomic Signatures of Local Adaptation Reveal Source-Sink Dynamics in a High Gene Flow Fish Species." *Scientific Reports* 7, no. 1 (Aug 17 2017): 8618.
- Curran, G. "Ecological Modernisation and Climate Change in Australia." [In English]. *Environmental Politics* 18, no. 2 (2009): 201-17.
- Curtis, E. M., J. Gollan, B. R. Murray, and A. Leigh. "Native Microhabitats Better Predict Tolerance to Warming Than Latitudinal Macro-Climatic Variables in Arid-Zone Plants." *Journal of Biogeography* 43, no. 6 (2016): 1156-65.
- Cvitanovic, C., N. A. Marshall, S. K. Wilson, K. Dobbs, and A. J. Hobday. "Perceptions of Australian Marine Protected Area Managers Regarding the Role, Importance, and Achievability of Adaptation for Managing the Risks of Climate Change." *Ecology and Society* 19, no. 4 (2014).
- D'Agui, H., W. Fowler, S. L. Lim, N. Enright, and T. He. "Phenotypic Variation and Differentiated Gene Expression of Australian Plants in Response to Declining Rainfall." *Royal Society Open Science* 3, no. 11 (Nov 2016): 160637.
- Dale, A., J. McKee, K. Vella, and R. Potts. "Carbon, Biodiversity and Regional Natural Resource Planning: Towards High Impact Next Generation Plans." [In English]. *Australian Planner* 50, no. 4 (2013): 328-39.
- Dale, A. P., K. Vella, R. Potts, B. Joyce, B. Stevenson, A. Cottrell, D. King, *et al.* "Applying Social Resilience Concepts and Indicators to Support Climate Adaptation in Tropical North Queensland, Australia." In *Climate Adaptation Governance in Cities and Regions: Theoretical Fundamentals and Practical Evidence*, 23-43, 2016.
- Dalmaris, E., C. E. Ramalho, P. Poot, E. J. Veneklaas, and M. Byrne. "A Climate Change Context for the Decline of a Foundation Tree Species in South-Western Australia: Insights from Phylogeography and Species Distribution Modelling." *Annals of Botany* 116, no. 6 (Nov 2015): 941-52.
- Daniell, K. A., M. A. Manez Costa, N. Ferrand, A. B. Kingsborough, P. Coad, and I. S. Ribarova. "Aiding Multi-Level Decision-Making Processes for Climate Change Mitigation and Adaptation." [In English]. *Regional Environmental Change* 11, no. 2 (2011): 243-58.

- Dann, P., and L. Chambers. "Ecological Effects of Climate Change on Little Penguins *Eudyptula Minor* and the Potential Economic Impact on Tourism." [In English]. *Climate Research* 58, no. 1 (2013): 67-79.
- Darbyshire, R., E. W. R. Barlow, L. Webb, and I. Goodwin. "Roadblocks to Assessing Climate Impacts on Temperate Perennial Fruit." In *Acta Horticulturae*, 11-17, 2016.
- Darbyshire, R., K. Pope, and I. Goodwin. "An Evaluation of the Chill Overlap Model to Predict Flowering Time in Apple Tree." *Scientia Horticulturae* 198 (2016): 142-49.
- Davies, N., G. Gramotnev, L. Seabrook, A. Bradley, G. Baxter, J. Rhodes, D. Lunney, and C. McAlpine. "Movement Patterns of an Arboreal Marsupial at the Edge of Its Range: A Case Study of the Koala." *Movement Ecology* 1, no. 1 (2013): 8.
- Davis, J., A. P. O'Grady, A. Dale, A. H. Arthington, P. A. Gell, P. D. Driver, N. Bond, *et al.* "When Trends Intersect: The Challenge of Protecting Freshwater Ecosystems under Multiple Land Use and Hydrological Intensification Scenarios." *Science of the Total Environment* 534 (Nov 15 2015): 65-78.
- Davis, J., A. Pavlova, R. Thompson, and P. Sunnucks. "Evolutionary Refugia and Ecological Refuges: Key Concepts for Conserving Australian Arid Zone Freshwater Biodiversity under Climate Change." [In English]. *Global Change Biology* 19, no. 7 (2013): 1970-84.
- De Dear, R. "Adaptive Comfort Applications in Australia and Impacts on Building Energy Consumption." Paper presented at the 6th International Conference on Indoor Air Quality, Ventilation and Energy Conservation in Buildings: Sustainable Built Environment, IAQVEC 2007, Sendai, 2007.
- De Vet, E. "Exploring Weather-Related Experiences and Practices: Examining Methodological Approaches." [In English]. *Area* 45, no. 2 (2013): 198-206.
- Dean, C., J. B. Kirkpatrick, R. J. Harper, and D. J. Eldridge. "Optimising Carbon Sequestration in Arid and Semiarid Rangelands." *Ecological Engineering* 74 (2015): 148-63.
- Dean, J. G., and H. J. Stain. "Mental Health Impact for Adolescents Living with Prolonged Drought." [In English]. *Australian Journal of Rural Health* 18, no. 1 (2010): 32-37.
- Denniss, R., M. Grudnoff, and A. Macintosh. "Complementary Climate Change Policies: A Framework for Evaluation." [In English]. *Economic and Labour Relations Review* 23, no. 1 (2012): 33-46.
- Di Virgilio, G., S. W. Laffan, and M. C. Ebach. "Quantifying High Resolution Transitional Breaks in Plant and Mammal Distributions at Regional Extent and Their Association with Climate, Topography and Geology." [In English]. *PLoS ONE* 8, no. 4 (2013).
- Dillon, S., R. McEvoy, D. S. Baldwin, G. N. Rees, Y. Parsons, and S. Southerton. "Characterisation of Adaptive Genetic Diversity in Environmentally Contrasted Populations of *Eucalyptus Camaldulensis* Dehnh. (River Red Gum)." [In English]. *PLoS ONE* 9, no. 8 (2014): e103515.
- Dillon, S., R. McEvoy, D. S. Baldwin, S. Southerton, C. Campbell, Y. Parsons, and G. N. Rees. "Genetic Diversity of *Eucalyptus Camaldulensis* Dehnh. Following Population Decline in Response to Drought and Altered Hydrological Regime." *Austral Ecology* 40, no. 5 (2015): 558-72.
- Dobes, L. "Sir Sidney Kidman: Australia's Cattle King as a Pioneer of Adaptation to Climatic Uncertainty." [In English]. *Rangeland Journal* 34, no. 1 (2012): 1-15.
- Doherty, M. D., A. M. Gill, G. J. Cary, and M. P. Austin. "Seed Viability of Early Maturing Alpine Ash (*Eucalyptus Delegatensis* Subsp. *Delegatensis*) in the Australian Alps, South-Eastern Australia, and Its Implications for Management under Changing Fire Regimes." *Australian Journal of Botany* 65, no. 6-7 (2017): 517-23.
- Doherty, M. D., S. Lavorel, M. J. Colloff, K. J. Williams, and R. J. Williams. "Moving from

- Autonomous to Planned Adaptation in the Montane Forests of Southeastern Australia under Changing Fire Regimes." *Austral Ecology* 42, no. 3 (2017): 309-16.
- Doley, D. "The Response of Forests to Climate Change: The Role of Silviculture in Conserving Threatened Species." [In English]. *Australian Forestry* 73, no. 2 (2010): 115-25.
- Donelson, J. M., M. I. McCormick, D. J. Booth, and P. L. Munday. "Reproductive Acclimation to Increased Water Temperature in a Tropical Reef Fish." [In English]. *PLoS ONE* 9, no. 5 (2014): e97223.
- Dong, N., I. Colin Prentice, B. J. Evans, S. Caddy-Retalic, A. J. Lowe, and I. J. Wright. "Leaf Nitrogen from First Principles: Field Evidence for Adaptive Variation with Climate." *Biogeosciences* 14, no. 2 (2017): 481-95.
- Dore, M. H. "Climate Change and Changes in Global Precipitation Patterns: What Do We Know?". *Environ Int* 31, no. 8 (Oct 2005): 1167-81.
- Dove, S. G., D. I. Kline, O. Pantos, F. E. Angly, G. W. Tyson, and O. Hoegh-Guldberg. "Future Reef Decalcification under a Business-as-Usual Co $\leq$ 2 Emission Scenario." *Proceedings of the National Academy of Sciences of the United States of America* 110, no. 38 (Sep 17 2013): 15342-47.
- Dowden, M. J. "Green Leases in the Uk Letting Market." Paper presented at the COBRA 2008 - Construction and Building Research Conference of the Royal Institution of Chartered Surveyors, 2008.
- Dowdy, A. J., M. R. Grose, B. Timbal, A. Moise, M. Ekström, J. Bhend, and L. Wilson. "Rainfall in Australia's Eastern Seaboard: A Review of Confidence in Projections Based on Observations and Physical Processes." *Australian Meteorological and Oceanographic Journal* 65, no. 1 (2015): 107-26.
- Dreyer, S. J., and I. Walker. "Acceptance and Support of the Australian Carbon Policy." [In English]. *Social Justice Research* 26, no. 3 (2013): 343-62.
- Drielsma, M. J., J. Love, K. J. Williams, G. Manion, H. Saremi, T. Harwood, and J. Robb. "Bridging the Gap between Climate Science and Regional-Scale Biodiversity Conservation in South-Eastern Australia." *Ecological Modelling* 360 (2017): 343-62.
- Dubey, S., D. A. Pike, and R. Shine. "Predicting the Impacts of Climate Change on Genetic Diversity in an Endangered Lizard Species." [In English]. *Climatic Change* 117, no. 1-2 (2013): 319-27.
- Duckett, P. E., P. D. Wilson, and A. J. Stow. "Keeping up with the Neighbours: Using a Genetic Measurement of Dispersal and Species Distribution Modelling to Assess the Impact of Climate Change on an Australian Arid Zone Gecko (*Gehyra Variegata*)." [In English]. *Diversity and Distributions* 19, no. 8 (2013): 964-76.
- Dunkerley, D. "Ecogeomorphology in the Australian Drylands and the Role of Biota in Mediating the Effects of Climate Change on Landscape Processes and Evolution." In *Geological Society Special Publication*, 87-120, 2010.
- Durrant, H. M. S., N. S. Barrett, G. J. Edgar, M. A. Coleman, and C. P. Burridge. "Shallow Phylogeographic Histories of Key Species in a Biodiversity Hotspot." *Phycologia* 54, no. 6 (2015): 556-65.
- Dutta, D., W. Wright, K. Nakayama, and Y. Sugawara. "Design of Synthetic Impact Response Functions for Flood Vulnerability Assessment under Climate Change Conditions: Case Studies in Two Selected Coastal Zones in Australia and Japan." [In English]. *Natural Hazards Review* 14, no. 1 (2013): 52-65.
- Dwyer, J. M., R. J. Hobbs, and M. M. Mayfield. "Specific Leaf Area Responses to Environmental Gradients through Space and Time." [In English]. *Ecology* 95, no. 2 (2014): 399-410.



- Dwyer, L., R. Spurr, P. Forsyth, and S. Hoque. "Australia's Tourism Carbon Footprint: A Production-Based Approach." In *Bridging Tourism Theory and Practice*, edited by C. Schott, 187-202, 2010.
- Dyer, F., S. ElSawah, B. Croke, R. Griffiths, E. Harrison, P. Lucena-Moya, and A. Jakeman. "The Effects of Climate Change on Ecologically-Relevant Flow Regime and Water Quality Attributes." [In English]. *Stochastic Environmental Research and Risk Assessment* 28, no. 1 (2014): 67-82.
- Dymond, C. C., S. Beukema, C. R. Nitschke, K. D. Coates, and R. M. Scheller. "Carbon Sequestration in Managed Temperate Coniferous Forests under Climate Change." *Biogeosciences* 13, no. 6 (2016): 1933-47.
- Eburn, M. "Bushfires and Australian Emergency Management Law and Policy: Adapting to Climate Change and the New Fire and Emergency Management Environment." In *Studies in Law Politics and Society*, 155-88, 2015.
- Eckard, R., A. Kelly, and S. Barlow. "Epilogue Future Challenges for the National Climate Change Research Strategy." [In English]. *Crop and Pasture Science* 63, no. 3 (2012): 297-301.
- Edgar, G. J., P. R. Last, N. S. Barrett, K. Gowlett-Holmes, M. Driessen, and P. Mooney. "Conservation of Natural Wilderness Values in the Port Davey Marine and Estuarine Protected Area, South-Western Tasmania." [In English]. *Aquatic Conservation: Marine and Freshwater Ecosystems* 20, no. 3 (2010): 297-311.
- Edwards, D. L., and J. D. Roberts. "Genetic Diversity and Biogeographic History Inform Future Conservation Management Strategies for the Rare Sunset Frog (*Spicospina flammocaerulea*)." [In English]. *Australian Journal of Zoology* 59, no. 2 (2011): 63-72.
- Edwards, F., J. Dixon, S. Friel, G. Hall, K. Larsen, S. Lockie, B. Wood, et al. "Climate Change Adaptation at the Intersection of Food and Health." [In English]. *Asia-Pacific Journal of Public Health* 23, no. 2 SUPPL. (2011): 91S-104S.
- Ejaz Qureshi, M., M. A. Hanjra, and J. Ward. "Impact of Water Scarcity in Australia on Global Food Security in an Era of Climate Change." [In English]. *Food Policy* 38, no. 1 (2013): 136-45.
- Ejaz Qureshi, M., S. M. Whitten, M. Mainuddin, S. Marvanek, and A. Elmahdi. "A Biophysical and Economic Model of Agriculture and Water in the Murray-Darling Basin, Australia." [In English]. *Environmental Modelling and Software* 41 (2013): 98-106.
- El-Zein, A. "Resilience and Vulnerability to Climate Change: Challenges of Temporal and Geographical Scales for Geotechnical Engineering." *Australian Geomechanics Journal* 51, no. 2 (2016): 65-76.
- Elliott, L. "Australia, Climate Change and the Global South." [In English]. *Round Table* 100, no. 415 (2011): 441-57.
- Ellis, W., A. Melzer, I. D. Clifton, and F. Carrick. "Climate Change and the Koala *Phascolarctos cinereus*: Water and Energy." [In English]. *Australian Zoologist* 35, no. 2 (2010): 369-77.
- Elrick-Barr, C., R. Kay, and N. Farmer. "Developing a Road Map for Climate Change Adaptation: The Experience of Surf Life Saving Australia." [In English]. *Ocean and Coastal Management* 86 (2013): 75-79.
- England, P. "Too Much Too Soon? On the Rise and Fall of Australia's Coastal Climate Change Law." [In English]. *Environmental and Planning Law Journal* 30, no. 5 (2013): 390-402.
- Enright, N. J., J. B. Fontaine, B. B. Lamont, B. P. Miller, and V. C. Westcott. "Resistance and Resilience to Changing Climate and Fire Regime Depend on Plant Functional Traits." *Journal of Ecology* 102, no. 6 (2014): 1572-81.
- Evans, G. R. "Transformation from "Carbon Valley" to a "Post-Carbon Society" in a Climate Change Hot Spot: The Coalfields of the Hunter Valley, New South Wales, Australia." [In English].

- Ecology and Society* 13, no. 1 (2008).
- Evans, J. P., and M. F. McCabe. "Effect of Model Resolution on a Regional Climate Model Simulation over Southeast Australia." [In English]. *Climate Research* 56, no. 2 (2013): 131-45.
- Evans, K., R. Thresher, R. M. Warneke, C. J. A. Bradshaw, M. Pook, D. Thiele, and M. A. Hindell. "Periodic Variability in Cetacean Strandings: Links to Large-Scale Climate Events." [In English]. *Biology Letters* 1, no. 2 (2005): 147-50.
- Evans, L. S., C. C. Hicks, P. Fidelman, R. C. Tobin, and A. L. Perry. "Future Scenarios as a Research Tool: Investigating Climate Change Impacts, Adaptation Options and Outcomes for the Great Barrier Reef, Australia." [In English]. *Human Ecology* 41, no. 6 (2013): 841-57.
- Fallon, D. S. M., and C. A. Sullivan. "Are We There Yet? Nsw Local Governments' Progress on Climate Change." [In English]. *Australian Geographer* 45, no. 2 (2014): 221-38.
- Fane, S., and A. Turner. "Integrated Water Resource Planning in the Context of Climate Uncertainty." In *Water Science and Technology: Water Supply*, 487-94, 2010.
- Farbotko, C. "Tuvalu and Climate Change: Constructions of Environmental Displacement in the Sydney Morning Herald." [In English]. *Geografiska Annaler, Series B: Human Geography* 87, no. 4 (2005): 279-93.
- Farrell, C., R. E. Mitchell, C. Szota, J. P. Rayner, and N. S. G. Williams. "Green Roofs for Hot and Dry Climates: Interacting Effects of Plant Water Use, Succulence and Substrate." [In English]. *Ecological Engineering* 49 (2012): 270-76.
- Fazey, I., R. M. Wise, C. Lyon, C. Câmpeanu, P. Moug, and T. E. Davies. "Past and Future Adaptation Pathways." *Climate and Development* 8, no. 1 (2016): 26-44.
- Fensham, R. J., D. L. Bouchard, C. P. Catterall, and J. M. Dwyer. "Do Local Moisture Stress Responses across Tree Species Reflect Dry Limits of Their Geographic Ranges?" [In English]. *Austral Ecology* 39, no. 5 (2014): 612-18.
- Ferguson, B. C., N. Frantzeskaki, and R. R. Brown. "A Strategic Program for Transitioning to a Water Sensitive City." [In English]. *Landscape and Urban Planning* 117 (2013): 32-45.
- Field, J., and S. Wroe. "Aridity, Faunal Adaptations and Australian Late Pleistocene Extinctions." [In English]. *World Archaeology* 44, no. 1 (2012): 56-74.
- Finlayson, C. M. "Climate Change and the Wise Use of Wetlands: Information from Australian Wetlands." [In English]. *Hydrobiologia* 708, no. 1 (2013): 145-52.
- Finlayson, C. M., S. J. Capon, D. Rissik, J. Pittock, G. Fisk, N. C. Davidson, K. A. Bodmin, *et al.* "Policy Considerations for Managing Wetlands under a Changing Climate." *Marine and Freshwater Research* 68, no. 10 (2017): 1803-15.
- Finlayson, C. M., J. A. Davis, P. A. Gell, R. T. Kingsford, and K. A. Parton. "The Status of Wetlands and the Predicted Effects of Global Climate Change: The Situation in Australia." [In English]. *Aquatic Sciences* 75, no. 1 (2013): 73-93.
- Fischer, M. J., and A. W. Paterson. "Detecting Trends That Are Nonlinear and Asymmetric on Diurnal and Seasonal Time Scales." [In English]. *Climate Dynamics* 43, no. 1-2 (Mar 2014): 361-74.
- Fitzgerald, B. "Climate Change Reporting in an Australian Context: Recognition, Adaptation and Solutions." [In English]. *Pacific Journalism Review* 19, no. 1 (2013): 203-19.
- Fitzsimmons, K. E., N. Stern, C. V. Murray-Wallace, W. Truscott, and C. Pop. "The Mungo Mega-Lake Event, Semi-Arid Australia: Non-Linear Descent into the Last Ice Age, Implications for Human Behaviour." *PLoS ONE* 10, no. 6 (2015): e0127008.
- Flukes, E. B., J. T. Wright, and C. R. Johnson. "Phenotypic Plasticity and Biogeographic Variation in Physiology of Habitat-Forming Seaweed: Response to Temperature and Nitrate." *Journal of Phycology* 51, no. 5 (Oct 2015): 896-909.

- Foerster, A., A. Macintosh, and J. McDonald. "Transferable Lessons for Climate Change Adaptation Planning? Managing Bushfire and Coastal Climate Hazards in Australia." [In English]. *Environmental and Planning Law Journal* 30, no. 6 (2013): 469-90.
- Foo, S. A., S. A. Dworjanyn, M. S. Khatkar, A. G. B. Poore, and M. Byrne. "Increased Temperature, but Not Acidification, Enhances Fertilization and Development in a Tropical Urchin: Potential for Adaptation to a Tropicalized Eastern Australia." [In English]. *Evolutionary Applications* 7, no. 10 (Dec 2014): 1226-37.
- Foo, S. A., S. A. Dworjanyn, A. G. B. Poore, and M. Byrne. "Adaptive Capacity of the Habitat Modifying Sea Urchin *Centrostephanus Rodgersii* to Ocean Warming and Ocean Acidification: Performance of Early Embryos." [In English]. *PLoS ONE* 7, no. 8 (2012).
- Fournier-Level, A., A. Neumann-Mondlak, R. T. Good, L. M. Green, J. M. Schmidt, and C. Robin. "Behavioural Response to Combined Insecticide and Temperature Stress in Natural Populations of *Drosophila Melanogaster*." *Journal of Evolutionary Biology* 29, no. 5 (May 2016): 1030-44.
- Franklin, D. C., A. E. Reside, and S. T. Garnett. "Management Options for Bird Conservation in the Face of Climate Change." In *Applied Studies in Climate Adaptation*, 68-76, 2014.
- Frentiu, F. D., M. Adamski, E. A. McGraw, M. W. Blows, and S. F. Chenoweth. "An Expressed Sequence Tag (Est) Library for *Drosophila Serrata*, a Model System for Sexual Selection and Climatic Adaptation Studies." [In English]. *BMC Genomics* 10 (2009).
- Friel, S. "Climate Change, Food Insecurity and Chronic Diseases: Sustainable and Healthy Policy Opportunities for Australia." [In English]. *New South Wales Public Health Bulletin* 21, no. 5-6 (2010): 129-33.
- Frieler, K., B. Schauburger, A. Arneth, J. Balkovič, J. Chryssanthacopoulos, D. Deryng, J. Elliott, *et al.* "Understanding the Weather Signal in National Crop-Yield Variability." *Earth's Future* 5, no. 6 (2017): 605-16.
- Fu, G., and S. Charles. "Multi-Model Climate Change Scenarios for Southwest Western Australia and Potential Impacts on Streamflow." Paper presented at the International Symposium: Quantification and Reduction of Predictive Uncertainty for Sustainable Water Resources Management - 24th General Assembly of the International Union of Geodesy and Geophysics (IUGG), Perugia, 2007.
- Fuentes, M. M. P. B., C. J. Limpus, and M. Hamann. "Vulnerability of Sea Turtle Nesting Grounds to Climate Change." [In English]. *Global Change Biology* 17, no. 1 (2011): 140-53.
- Fuentes, M. M. P. B., and W. P. Porter. "Using a Microclimate Model to Evaluate Impacts of Climate Change on Sea Turtles." [In English]. *Ecological Modelling* 251 (2013): 150-57.
- Fulton, E. A. "Interesting Times: Winners, Losers, and System Shifts under Climate Change around Australia." [In English]. *ICES Journal of Marine Science* 68, no. 6 (2011): 1329-42.
- Gallagher, R. V., R. O. Makinson, P. M. Hogbin, and N. Hancock. "Assisted Colonization as a Climate Change Adaptation Tool." *Austral Ecology* 40, no. 1 (2015): 12-20.
- Gardner, J. L., R. Heinsohn, and L. Joseph. "Shifting Latitudinal Clines in Avian Body Size Correlate with Global Warming in Australian Passerines." [In English]. *Proceedings of the Royal Society B: Biological Sciences* 276, no. 1674 (2009): 3845-52.
- Garnaut, R. "Climate Change and Indonesia: In Honour of Panglaykim." [In English]. *Bulletin of Indonesian Economic Studies* 45, no. 1 (2009): 107-16.
- Garrote, L. "Managing Water Resources to Adapt to Climate Change: Facing Uncertainty and Scarcity in a Changing Context." *Water Resources Management* 31, no. 10 (2017): 2951-63.
- Gartley, M., B. Nawarathna, B. Davidson, H. Malano, R. Singh, and B. Maheshwari. "System Harmonisation Framework for Water Resources Planning in Peri-Urban Catchments." Paper

- presented at the 18th World IMACS Congress and International Congress on Modelling and Simulation: Interfacing Modelling and Simulation with Mathematical and Computational Sciences, MODSIM09, Cairns, QLD, 2009.
- Gates, K., J. Sandoval-Castillo, L. Bernatchez, and L. B. Beheregaray. "De Novo Transcriptome Assembly and Annotation for the Desert Rainbowfish (*Melanotaenia Splendida* Tatei) with Comparison with Candidate Genes for Future Climates." *Marine Genomics* 35 (Oct 2017): 63-68.
- Gauthier, P. P. G., K. Y. Crous, G. Ayub, H. Duan, L. K. Weerasinghe, D. S. Ellsworth, M. G. Tjoelker, *et al.* "Drought Increases Heat Tolerance of Leaf Respiration in Eucalyptus Globulus Saplings Grown under Both Ambient and Elevated Atmospheric [Co<sub>2</sub>] and Temperature." *Journal of Experimental Botany* 65, no. 22 (Dec 2014): 6471-85.
- George, B., B. Davidson, B. Nawarathna, D. Ryu, H. Malano, A. Kulkarni, S. Patwardhan, *et al.* "A Modeling Framework to Evaluate Climate Change and Watershed Development Impacts on Water Security." Paper presented at the 19th International Congress on Modelling and Simulation - Sustaining Our Future: Understanding and Living with Uncertainty, MODSIM2011, Perth, WA, 2011.
- Ghanem, R., and K. Ruddock. "Are New South Wales' Planning Laws Climate-Change Ready?" [In English]. *Environmental and Planning Law Journal* 28, no. 1 (2011): 17-35.
- Ghosh, S., and L. Head. "Retrofitting the Suburban Garden: Morphologies and Some Elements of Sustainability Potential of Two Australian Residential Suburbs Compared." [In English]. *Australian Geographer* 40, no. 3 (2009): 319-46.
- Gibb, H., and C. L. Parr. "Does Structural Complexity Determine the Morphology of Assemblages? An Experimental Test on Three Continents." *PLoS ONE* 8, no. 5 (2013): e64005.
- Gibson, P. B., S. E. Perkins-Kirkpatrick, L. V. Alexander, and E. M. Fischer. "Comparing Australian Heat Waves in the Cmp5 Models through Cluster Analysis." *Journal of Geophysical Research* 122, no. 6 (2017): 3266-81.
- Giest, S., and M. Howlett. "Understanding the Pre-Conditions of Commons Governance: The Role of Network Management." *Environmental Science and Policy* 36 (2014): 37-47.
- Giorgi, F., and X. Bi. "Time of Emergence (Toe) of Ghg-Forced Precipitation Change Hot-Spots." *Geophysical Research Letters* 36, no. 6 (2009).
- Glasgow, N. "Systems for the Management of Respiratory Disease in Primary Care - an International Series: Australia." [In English]. *Primary Care Respiratory Journal* 17, no. 1 (2008): 19-25.
- Gleadow, R., A. Johnson, and M. Tausz. "Crops for a Future Climate." [In English]. *Functional Plant Biology* 40, no. 2 (2013): iii-vi.
- Gleeson, B. "Critical Commentary. Waking from the Dream: An Australian Perspective on Urban Resilience." [In English]. *Urban Studies* 45, no. 13 (2008): 2653-68.
- Godden, L. "Legal Frameworks for Local Adaptation in Australia: The Role of Local Government in Water Governance in a Climate Change Era." In *Local Climate Change Law: Environmental Regulation in Cities and Other Localities*, 325-88: Edward Elgar Publishing Ltd., 2012.
- Godden, L., and A. Kung. "Water Law and Planning Frameworks under Climate Change Variability: Systemic and Adaptive Management of Flood Risk." [In English]. *Water Resources Management* 25, no. 15 (2011): 4051-68.
- Godfree, R. C., B. C. Robertson, W. J. Gapare, M. Ivković, D. J. Marshall, B. J. Lepschi, and A. B. Zwart. "Nonindigenous Plant Advantage in Native and Exotic Australian Grasses under Experimental Drought, Warming, and Atmospheric Co<sub>2</sub> Enrichment." [In English]. *Biology* 2, no. 2 (2013): 481-513.

- Gowane, G. R., Y. P. Gadekar, V. Prakash, V. Kadam, A. Chopra, and L. L. L. Prince. "Climate Change Impact on Sheep Production: Growth, Milk, Wool, and Meat." Chap. Chapter 2 In *Sheep Production Adapting to Climate Change*, 31-69, 2017.
- Granberg, M., and L. Glover. "Adaptation and Maladaptation in Australian National Climate Change Policy." [In English]. *Journal of Environmental Policy and Planning* 16, no. 2 (2014): 147-59.
- Granqvist, L., W. Glamore, and R. Cox. "Using Elevated Digital Images, Vegetation Mapping and Hydrodynamic Modelling to Track Tidal Hydraulics and Saltmarsh Evolution." Paper presented at the Proceedings of the 34th Hydrology and Water Resources Symposium, HWRS 2012, 2012.
- Grantham, H. S., E. McLeod, A. Brooks, S. D. Jupiter, J. Hardcastle, A. J. Richardson, E. S. Poloczanska, *et al.* "Ecosystem-Based Adaptation in Marine Ecosystems of Tropical Oceania in Response to Climate Change." [In English]. *Pacific Conservation Biology* 17, no. 3 (2011): 241-58.
- Green, D., and L. Minchin. "Living on Climate-Changed Country: Indigenous Health, Well-Being and Climate Change in Remote Australian Communities." [In English]. *EcoHealth* 11, no. 2 (Jun 2014): 263-72.
- Green, E. I. H., G. Blashki, and H. L. Berry. "Preparing Australian Medical Students for Climate Change." [In English]. *Australian Family Physician* 38, no. 9 (2009): 726-29.
- Greenstein, B. J., and J. M. Pandolfi. "Escaping the Heat: Range Shifts of Reef Coral Taxa in Coastal Western Australia." [In English]. *Global Change Biology* 14, no. 3 (2008): 513-28.
- Griffin, P. C., and A. A. Hoffmann. "Mortality of Australian Alpine Grasses (*Poa* Spp.) after Drought: Species Differences and Ecological Patterns." [In English]. *Journal of Plant Ecology* 5, no. 2 (2012): 121-33.
- Griffiths, A., N. Haigh, and J. Rassias. "A Framework for Understanding Institutional Governance Systems and Climate Change: The Case of Australia." [In English]. *European Management Journal* 25, no. 6 (2007): 415-27.
- Gross, C. L., M. Fatemi, and I. H. Simpson. "Seed Provenance for Changing Climates: Early Growth Traits of Nonlocal Seed Are Better Adapted to Future Climatic Scenarios, but Not to Current Field Conditions." *Restoration Ecology* 25, no. 4 (2017): 577-86.
- Gross, M. H., L. V. Alexander, I. Macadam, D. Green, and J. P. Evans. "The Representation of Health-Relevant Heatwave Characteristics in a Regional Climate Model Ensemble for New South Wales and the Australian Capital Territory, Australia." *International Journal of Climatology* 37, no. 3 (2017): 1195-210.
- Guan, L. "Implication of Global Warming on Air-Conditioned Office Buildings in Australia." [In English]. *Building Research and Information* 37, no. 1 (2009): 43-54.
- Guerin, G. R., H. Wen, and A. J. Lowe. "Leaf Morphology Shift Linked to Climate Change." [In English]. *Biology Letters* 8, no. 5 (2012): 882-86.
- Gunasekera, D., M. Ford, E. Heyhoe, A. Gurney, H. Ahammad, S. Phipps, I. Harman, J. Finnigan, and M. Brede. "Global Integrated Assessment Model: A New Analytical Tool for Assessing Climate Change Risks and Policies." *Australian Commodities* 15, no. 1 (2008): 195-216.
- Guo, Y., A. Gasparrini, B. Armstrong, S. Li, B. Tawatsupa, A. Tobias, E. Lavigne, *et al.* "Global Variation in the Effects of Ambient Temperature on Mortality: A Systematic Evaluation." *Epidemiology* 25, no. 6 (Nov 2014): 781-89.
- Gurwitt, S., K. Malkki, and M. Mitra. "Global Issue, Developed Country Bias: The Paris Climate Conference as Covered by Daily Print News Organizations in 13 Nations." *Climatic Change* 143, no. 3-4 (2017): 281-96.
- Haby, N. A., J. Foulkes, and B. W. Brook. "Using Climate Variables to Predict Small Mammal

- Occurrence in Hot, Dry Environments." [In English]. *Landscape Ecology* 28, no. 4 (2013): 741-53.
- Hadwen, W. L., A. H. Arthington, P. I. Boon, B. Taylor, and C. S. Fellows. "Do Climatic or Institutional Factors Drive Seasonal Patterns of Tourism Visitation to Protected Areas across Diverse Climate Zones in Eastern Australia?" [In English]. *Tourism Geographies* 13, no. 2 (2011): 187-208.
- Hagger, V., D. Fisher, S. Schmidt, and S. Blomberg. "Assessing the Vulnerability of an Assemblage of Subtropical Rainforest Vertebrate Species to Climate Change in South-East Queensland." [In English]. *Austral Ecology* 38, no. 4 (2013): 465-75.
- Hahn, M. W., and M. Pockl. "Ecotypes of Planktonic Actinobacteria with Identical 16s Rrna Genes Adapted to Thermal Niches in Temperate, Subtropical, and Tropical Freshwater Habitats." *Appl Environ Microbiol* 71, no. 2 (Feb 2005): 766-73.
- Haines, M. G., and S. J. Attard. "Watersense Web Based Irrigation Scheduling and Climate Interpretive Tool Supports Adaptive Management Strategies Approach." Paper presented at the 32nd Annual Conference of the Australian Society of Sugar Cane Technologists 2010, ASSCT 2010, 2010.
- Hall, A., and G. V. Jones. "Effect of Potential Atmospheric Warming on Temperature-Based Indices Describing Australian Winegrape Growing Conditions." [In English]. *Australian Journal of Grape and Wine Research* 15, no. 2 (2009): 97-119.
- Hamin, E. M., and N. Gurrán. "Urban Form and Climate Change: Balancing Adaptation and Mitigation in the U.S. And Australia." [In English]. *Habitat International* 33, no. 3 (2009): 238-45.
- Hamon, K. G., S. D. Frusher, L. R. Little, O. Thébaud, and A. E. Punt. "Adaptive Behaviour of Fishers to External Perturbations: Simulation of the Tasmanian Rock Lobster Fishery." [In English]. *Reviews in Fish Biology and Fisheries* 24, no. 2 (2014): 577-92.
- Hancock, N., and L. Hughes. "How Far Is It to Your Local? A Survey on Local Provenance Use in New South Wales." [In English]. *Ecological Management and Restoration* 13, no. 3 (2012): 259-66.
- . "Turning up the Heat on the Provenance Debate: Testing the 'Local Is Best' Paradigm under Heatwave Conditions." [In English]. *Austral Ecology* 39, no. 5 (2014): 600-11.
- Hancock, N., M. R. Leishman, and L. Hughes. "Testing the "Local Provenance" Paradigm: A Common Garden Experiment in Cumberland Plain Woodland, Sydney, Australia." [In English]. *Restoration Ecology* 21, no. 5 (2013): 569-77.
- Hangartner, S. B., A. A. Hoffmann, A. Smith, and P. C. Griffin. "A Collection of Australian Drosophila Datasets on Climate Adaptation and Species Distributions." *Scientific Data* 2 (Nov 24 2015): 150067.
- Hanigan, I. C., C. D. Butler, P. N. Kokic, and M. F. Hutchinson. "Suicide and Drought in New South Wales, Australia, 1970-2007." [In English]. *Proceedings of the National Academy of Sciences of the United States of America* 109, no. 35 (2012): 13950-55.
- Hanna, E. G., E. Bell, D. King, and R. Woodruff. "Climate Change and Australian Agriculture: A Review of the Threats Facing Rural Communities and the Health Policy Landscape." [In English]. *Asia-Pacific Journal of Public Health* 23, no. 2 SUPPL. (2011): 105S-18S.
- Hanna, E. G., and J. T. Spickett. "Climate Change and Human Health: Building Australia's Adaptation Capacity." [In English]. *Asia-Pacific Journal of Public Health* 23, no. 2 SUPPL. (2011): 7S-13S.
- Hansen, A., L. Bi, A. Saniotis, and M. Nitschke. "Vulnerability to Extreme Heat and Climate Change: Is Ethnicity a Factor?" [In English]. *Global Health Action* 6, no. 1 (2013).
- Hansen, A., M. Nitschke, and P. Bi. "Adaptation to Extreme Heat and Climate Change in Culturally and Linguistically Diverse Communities." In *Applied Studies in Climate Adaptation*, 241-49, 2014.
- Hansen, A., M. Nitschke, A. Saniotis, J. Benson, Y. Tan, V. Smyth, L. Wilson, *et al.* "Extreme Heat and Cultural and Linguistic Minorities in Australia: Perceptions of Stakeholders." [In English]. *BMC*

- Public Health* 14, no. 1 (Jun 3 2014): 550.
- Haque, M. M., A. Rahman, D. Hagare, and G. Kibria. "Probabilistic Water Demand Forecasting Using Projected Climatic Data for Blue Mountains Water Supply System in Australia." [In English]. *Water Resources Management* 28, no. 7 (2014): 1959-71.
- Hardie, S. A. "Hydrological Manipulation to Assist Spawning of a Threatened Galaxiid Fish in a Highland Lake System." [In English]. *Marine and Freshwater Research* 64, no. 9 (2013): 887-99.
- Hardy, N. A., and M. Byrne. "Early Development of Congeneric Sea Urchins (*Heliocidaris*) with Contrasting Life History Modes in a Warming and High CO<sub>2</sub> Ocean." *Marine Environmental Research* 102 (Dec 2014): 78-87.
- Hardy, T. A., L. B. Mason, and J. D. McConochie. "Generating Synthetic Tropical Cyclone Databases for Input to Modeling of Extreme Winds, Waves, and Storm Surges." In *Indian Ocean Tropical Cyclones and Climate Change*, 57-64: Springer Netherlands, 2010.
- Harle, K. J., S. M. Howden, L. P. Hunt, and M. Dunlop. "The Potential Impact of Climate Change on the Australian Wool Industry by 2030." [In English]. *Agricultural Systems* 93, no. 1-3 (2007): 61-89.
- Harley, D., P. Bi, G. Hall, A. Swaminathan, S. Tong, and C. Williams. "Climate Change and Infectious Diseases in Australia: Future Prospects, Adaptation Options, and Research Priorities." [In English]. *Asia-Pacific Journal of Public Health* 23, no. 2 SUPPL. (2011): 54S-66S.
- Harman, B. P., S. Heyenga, B. M. Taylor, and C. S. Fletcher. "Global Lessons for Adapting Coastal Communities to Protect against Storm Surge Inundation." *Journal of Coastal Research* 31, no. 4 (2015): 790-801.
- Harris, J. H., R. T. Kingsford, W. Peirson, and L. J. Baumgartner. "Mitigating the Effects of Barriers to Freshwater Fish Migrations: The Australian Experience." *Marine and Freshwater Research* 68, no. 4 (2017): 614-28.
- Harris, S., S. Arnall, M. Byrne, D. Coates, M. Hayward, T. Martin, N. Mitchell, and S. Garnett. "Whose Backyard? Some Precautions in Choosing Recipient Sites for Assisted Colonisation of Australian Plants and Animals." [In English]. *Ecological Management and Restoration* 14, no. 2 (2013): 106-11.
- Harrison, K. A., J. D. L. Yen, A. Pavlova, M. L. Rourke, D. Gilligan, B. A. Ingram, J. Lyon, Z. Tonkin, and P. Sunnucks. "Identifying Environmental Correlates of Intraspecific Genetic Variation." *Heredity* 117, no. 3 (Sep 2016): 155-64.
- Harry, C. "Classical Decision Rules and Adaptation to Climate Change." [In English]. *Australian Journal of Agricultural and Resource Economics* 52, no. 4 (2008): 487-504.
- Hart, B. T. "The Australian Murray-Darling Basin Plan: Factors Leading to Its Successful Development." *Ecohydrology and Hydrobiology* 16, no. 4 (2016): 229-41.
- Harvey, N., and C. D. Woodroffe. "Australian Approaches to Coastal Vulnerability Assessment." [In English]. *Sustainability Science* 3, no. 1 (2008): 67-87.
- Hastings, P. A., and I. R. W. Childs. "Adapting to Sea-Level Rise: Lessons for the Future from Redcliffe, Australia." In *Meltdown: Climate Change, Natural Disasters and Other Catastrophes - Fears and Concerns of the Future*, 229-46: Nova Science Publishers, Inc., 2009.
- Hawltischek, O., L. Hendrich, M. Espeland, E. F. A. Toussaint, M. J. Genner, and M. Balke. "Pleistocene Climate Change Promoted Rapid Diversification of Aquatic Invertebrates in Southeast Australia." *BMC Evolutionary Biology* 12, no. 1 (Aug 9 2012): 142.
- Hayes, B. J., P. J. Bowman, A. J. Chamberlain, K. Savin, C. P. van Tassell, T. S. Sonstegard, and M. E. Goddard. "A Validated Genome Wide Association Study to Breed Cattle Adapted to an Environment Altered by Climate Change." [In English]. *PLoS ONE* 4, no. 8 (2009).

- Hayman, P., L. Rickards, R. Eckard, and D. Lemerle. "Climate Change through the Farming Systems Lens: Challenges and Opportunities for Farming in Australia." [In English]. *Crop and Pasture Science* 63, no. 3 (2012): 203-14.
- Haywood, C. "The European Union's Emissions Trading Scheme: International Emissions Trading Lessons for the Copenhagen Protocol and Implications for Australia?". *Environmental and Planning Law Journal* 26, no. 4 (2009): 310-29.
- Head, B. W. "Evidence, Uncertainty, and Wicked Problems in Climate Change Decision Making in Australia." [In English]. *Environment and Planning C: Government and Policy* 32, no. 4 (2014): 663-79.
- Head, L., M. Adams, H. V. McGregor, and S. Toole. "Climate Change and Australia." [In English]. *Wiley Interdisciplinary Reviews: Climate Change* 5, no. 2 (2014): 175-97.
- Healy, M. A., K. Forrest, and G. Bastin. "The Role of a Knowledge Broker in Improving Knowledge and Understanding of Climate Change in the Australian Rangelands." *Rangeland Journal* 37, no. 6 (2015): 541-54.
- Heazle, M., P. Tangney, P. Burton, M. Howes, D. Grant-Smith, K. Reis, and K. Bosomworth. "Mainstreaming Climate Change Adaptation: An Incremental Approach to Disaster Risk Management in Australia." [In English]. *Environmental Science and Policy* 33 (2013): 162-70.
- Heffernan, O. "No Going Back." *Nature* 491, no. 7426 (Nov 29 2012): 659-61.
- Heinrich, I., and K. Allen. "Current Issues and Recent Advances in Australian Dendrochronology: Where to Next?" [In English]. *Geographical Research* 51, no. 2 (2013): 180-91.
- Henry, B., E. Charmley, R. Eckard, J. B. Gaughan, and R. Hegarty. "Livestock Production in a Changing Climate: Adaptation and Mitigation Research in Australia." [In English]. *Crop and Pasture Science* 63, no. 3 (2012): 191-202.
- Herath, S. M., P. R. Sarukkalgige, and V. T. V. Nguyen. "A Spatial Temporal Downscaling Approach to Development of Idf Relations for Perth Airport Region in the Context of Climate Change." *Hydrological Sciences Journal* 61, no. 11 (2016): 2061-70.
- Heupel, M. R., and C. A. Simpfendorfer. "Importance of Environmental and Biological Drivers in the Presence and Space Use of a Reef-Associated Shark." [In English]. *Marine Ecology Progress Series* 496 (2014): 47-57.
- Heyhoe, E., Y. Kim, P. Kokic, C. Levantis, H. Ahammad, K. Schneider, S. Crimp, *et al.* "Adapting to Climate Change." [In English]. *Australian Commodities* 14, no. 1 (2007): 167-78.
- Hill, M. P., S. L. Chown, and A. A. Hoffmann. "A Predicted Niche Shift Corresponds with Increased Thermal Resistance in an Invasive Mite, *Halotydeus Destructor*." [In English]. *Global Ecology and Biogeography* 22, no. 8 (2013): 942-51.
- Hill, M. P., A. A. Hoffmann, S. MacFadyen, P. A. Umina, and J. Elith. "Understanding Niche Shifts: Using Current and Historical Data to Model the Invasive Redlegged Earth Mite, *Halotydeus Destructor*." [In English]. *Diversity and Distributions* 18, no. 2 (2012): 191-203.
- Hill, N. J., M. L. Power, and E. M. Deane. "Absence of Ross River Virus Amongst Common Brushtail Possums (*Trichosurus Vulpecula*) from Metropolitan Sydney, Australia." [In English]. *European Journal of Wildlife Research* 55, no. 3 (2009): 313-16.
- Hobbs, T. J., C. R. Neumann, W. S. Meyer, T. Moon, and B. A. Bryan. "Models of Reforestation Productivity and Carbon Sequestration for Land Use and Climate Change Adaptation Planning in South Australia." *Journal of Environmental Management* 181 (Oct 1 2016): 279-88.
- Hobday, A. J., R. H. Bustamante, A. Farmery, A. Fleming, S. Frusher, B. S. Green, L. Lim-Camacho, *et al.* "Growth Opportunities for Marine Fisheries and Aquaculture Industries in a Changing Climate." In *Applied Studies in Climate Adaptation*, 139-55, 2014.



- Hobday, A. J., L. E. Chambers, and J. P. Y. Arnould. "Methods to Prioritise Adaptation Options for Iconic Seabirds and Marine Mammals Impacted by Climate Change." In *Applied Studies in Climate Adaptation*, 77-94, 2014.
- Hobday, A. J., and J. M. Lough. "Projected Climate Change in Australian Marine and Freshwater Environments." [In English]. *Marine and Freshwater Research* 62, no. 9 (2011): 1000-14.
- Hocknull, S. A., J. x Zhao, Y. x Feng, and G. E. Webb. "Responses of Quaternary Rainforest Vertebrates to Climate Change in Australia." [In English]. *Earth and Planetary Science Letters* 264, no. 1-2 (2007): 317-31.
- Hodgkinson, J. H., A. J. Hobday, and E. A. Pinkard. "Climate Adaptation in Australia's Resource-Extraction Industries: Ready or Not?" [In English]. *Regional Environmental Change* 14, no. 4 (2014): 1663-78.
- Hoffmann, A. A., and A. R. Weeks. "Climatic Selection on Genes and Traits after a 100 Year-Old Invasion: A Critical Look at the Temperate-Tropical Clines in *Drosophila Melanogaster* from Eastern Australia." [In English]. *Genetica* 129, no. 2 (2007): 133-47.
- Hogan, A., R. Tanton, S. Lockie, and S. May. "Focusing Resource Allocation-Wellbeing as a Tool for Prioritizing Interventions for Communities at Risk." [In English]. *International Journal of Environmental Research and Public Health* 10, no. 8 (2013): 3435-52.
- Holbrook, N. J., and J. E. Johnson. "Climate Change Impacts and Adaptation of Commercial Marine Fisheries in Australia: A Review of the Science." [In English]. *Climatic Change* 124, no. 4 (2014): 703-15.
- Holleley, C. E., D. O'Meally, S. D. Sarre, J. A. Marshall Graves, T. Ezaz, K. Matsubara, B. Azad, X. Zhang, and A. Georges. "Sex Reversal Triggers the Rapid Transition Fromgenetic to Temperature-Dependent Sex." *Nature* 523, no. 7558 (Jul 2 2015): 79-82.
- Holloway-Phillips, M. M., H. Huai, A. Cochrane, and A. B. Nicotra. "Differences in Seedling Water-Stress Response of Two Co-Occurring *Banksia* Species." *Australian Journal of Botany* 63, no. 8 (2015): 647-56.
- Hope, B. K. "An Examination of Ecological Risk Assessment and Management Practices." *Environ Int* 32, no. 8 (Dec 2006): 983-95.
- Hope, P., M. R. Grose, B. Timbal, A. J. Dowdy, J. Bhend, J. J. Katzfey, T. Bedin, L. Wilson, and P. H. Whetton. "Seasonal and Regional Signature of the Projected Southern Australian Rainfall Reduction." *Australian Meteorological and Oceanographic Journal* 65, no. 1 (2015): 54-71.
- Hopkins, C. R., D. M. Bailey, and T. Potts. "Perceptions of Practitioners: Managing Marine Protected Areas for Climate Change Resilience." *Ocean and Coastal Management* 128 (2016): 18-28.
- Horn, L. "Is Litigation an Effective Weapon for Pacific Island Nations in the War against Climate Change?" [In English]. *Asia Pacific Journal of Environmental Law* 12, no. 1 (2009): 169-202.
- Horne, J. "Australian Water Policy in a Climate Change Context: Some Reflections." [In English]. *International Journal of Water Resources Development* 29, no. 2 (2013): 137-51.
- Horne, R., and A. Martel. "Housing, Households and Climate Change Adaptation in the Town Camps of Alice Springs." In *Applied Studies in Climate Adaptation*, 289-96, 2014.
- Horton, G., L. Hanna, and B. Kelly. "Drought, Drying and Climate Change: Emerging Health Issues for Ageing Australians in Rural Areas." [In English]. *Australasian Journal on Ageing* 29, no. 1 (2010): 2-7.
- Hoskin, C. J., M. Tonione, M. Higgie, J. B. Mackenzie, S. E. Williams, J. VanDerWal, and C. Moritz. "Persistence in Peripheral Refugia Promotes Phenotypic Divergence and Speciation in a Rainforest Frog." [In English]. *American Naturalist* 178, no. 5 (2011): 561-78.
- Hosseini Bai, S., F. Sun, Z. Xu, T. J. Blumfield, C. Chen, and C. Wild. "Appraisal of <sup>15</sup>n Enrichment

- and 15n Natural Abundance Methods for Estimating N<sub>2</sub> Fixation by Understorey Acacia Leicocalyx and A. Disparimma in a Native Forest of Subtropical Australia." [In English]. *Journal of Soils and Sediments* 12, no. 5 (2012): 653-62.
- Houston, W. A., and R. L. Black. "Effect of a Major Flood on Breeding and Habitat of the Crimson Finch (Neochmia Phaeton): A Riparian Specialist." [In English]. *River Research and Applications* 30, no. 5 (2014): 609-16.
- Howard, R., I. Bell, and D. A. Pike. "Tropical Flatback Turtle (Natator Depressus) Embryos Are Resilient to the Heat of Climate Change." *Journal of Experimental Biology* 218, no. 20 (Oct 2015): 3330-35.
- Howden, M., S. Schroeter, S. Crimp, and I. Hanigan. "The Changing Roles of Science in Managing Australian Droughts: An Agricultural Perspective." [In English]. *Weather and Climate Extremes* 3 (2014): 80-89.
- Howden, M. S., and S. J. Crimp. "Regional Impacts: Australia." In *Crop Adaptation to Climate Change*, 143-55: Wiley-Blackwell, 2011.
- Howden, S. M., S. J. Crimp, and C. J. Stokes. "Climate Change and Australian Livestock Systems: Impacts, Research and Policy Issues." [In English]. *Australian Journal of Experimental Agriculture* 48, no. 7 (2008): 780-88.
- Howes, M., and A. Dedekorkut-Howes. "The Rise and Fall of Climate Adaptation Governance on the Gold Coast, Australia." In *Climate Adaptation Governance in Cities and Regions: Theoretical Fundamentals and Practical Evidence*, 237-50, 2016.
- Huai, J. "Dynamics of Resilience of Wheat to Drought in Australia from 1991-2010." *Scientific Reports* 7, no. 1 (Aug 25 2017): 9532.
- Huang, C., A. G. Barnett, X. Wang, and S. Tong. "The Impact of Temperature on Years of Life Lost in Brisbane, Australia." [In English]. *Nature Climate Change* 2, no. 4 (2012): 265-70.
- Huggel, C., D. Stone, H. Eicken, and G. Hansen. "Potential and Limitations of the Attribution of Climate Change Impacts for Informing Loss and Damage Discussions and Policies." *Climatic Change* 133, no. 3 (2015): 453-67.
- Hughes, L. "Climate Change and Australia: Key Vulnerable Regions." [In English]. *Regional Environmental Change* 11, no. SUPPL. 1 (2011): 189-95.
- Hunter, E. "'Radical Hope' and Rain: Climate Change and the Mental Health of Indigenous Residents of Northern Australia." [In English]. *Australasian Psychiatry* 17, no. 6 (2009): 445-52.
- Inman-Bamber, G., P. Jackson, and M. Bourgault. "Genetic Adjustment to Changing Climates: Sugarcane." In *Crop Adaptation to Climate Change*, 439-47: Wiley-Blackwell, 2011.
- Ison, R., C. Allan, and K. Collins. "Reframing Water Governance Praxis: Does Reflection on Metaphors Have a Role?". *Environment and Planning C: Government and Policy* 33, no. 6 (2015): 1697-713.
- Ivković, M., A. Hamann, W. J. Gapare, T. Jovanovic, and A. Yanchuk. "A Framework for Testing Radiata Pine under Projected Climate Change in Australia and New Zealand." *New Forests* 47, no. 2 (2016): 209-22.
- Iyer-Raniga, U., P. Arcari, and J. P. C. Wong. "Education for Sustainability in the Built Environment: What Are Students Telling Us?" Paper presented at the 26th Annual Conference of the Association of Researchers in Construction Management, ARCOM 2010, Leeds, 2010.
- Jabbar, A., J. Cotter, J. Lyon, A. V. Koehler, R. B. Gasser, and B. Besier. "Unexpected Occurrence of Haemonchus Placei in Cattle in Southern Western Australia." [In English]. *Infection, Genetics and Evolution* 21 (Jan 2014): 252-58.
- Jackson, T. M., M. A. Hanjra, S. Khan, and M. M. Hafeez. "Building a Climate Resilient Farm: A Risk

- Based Approach for Understanding Water, Energy and Emissions in Irrigated Agriculture." [In English]. *Agricultural Systems* 104, no. 9 (2011): 729-45.
- Jacobson, C., K. F. D. Hughey, A. J. J. Lynch, M. Nursey-Bray, M. O'Connell, P. G. Munro, K. Vella, *et al.* "Twenty Years of Pacifying Responses to Environmental Management." [In English]. *Australasian Journal of Environmental Management* 21, no. 2 (2014): 143-74.
- Jakeman, A., R. Kelly, J. Ticehurst, R. Blakers, B. Croke, A. Curtis, B. Fu, *et al.* "Modelling for the Complex Issue of Groundwater Management." Paper presented at the 2nd International Conference on Simulation and Modeling Methodologies, Technologies and Applications, SIMULTECH 2012, Rome, 2012.
- Jakob, D., and D. Walland. "Variability and Long-Term Change in Australian Temperature and Precipitation Extremes." *Weather and Climate Extremes* 14 (2016): 36-55.
- James, E. A., and K. L. McDougall. "Spatial Genetic Structure Reflects Extensive Clonality, Low Genotypic Diversity and Habitat Fragmentation in *Grevillea Renwickiana* (Proteaceae), a Rare, Sterile Shrub from South-Eastern Australia." [In English]. *Annals of Botany* 114, no. 2 (Aug 2014): 413-23.
- Jamieson, M., A. Wicks, and T. Boulding. "Becoming Environmentally Sustainable in Healthcare: An Overview." *Australian Health Review* 39, no. 4 (Sep 2015): 417-24.
- Jane Wilkinson, S., and R. Reed. "Examining and Quantifying the Drivers Behind Alterations and Extensions to Commercial Buildings in a Central Business District." [In English]. *Construction Management and Economics* 29, no. 7 (2011): 725-35.
- Jardine, T. D., N. R. Bond, M. A. Burford, M. J. Kennard, D. P. Ward, P. Bayliss, P. M. Davies, *et al.* "Does Flood Rhythm Drive Ecosystem Responses in Tropical Riverscapes?" *Ecology* 96, no. 3 (2015): 684-92.
- Jarrad, F. C., C. H. Wahren, R. J. Williams, and M. A. Burgman. "Subalpine Plants Show Short-Term Positive Growth Responses to Experimental Warming and Fire." [In English]. *Australian Journal of Botany* 57, no. 6 (2009): 465-73.
- Jenkins, K. M., R. T. Kingsford, G. P. Closs, B. J. Wolfenden, C. D. Matthaei, and S. E. Hay. "Climate Change and Freshwater Ecosystems in Oceania: An Assessment of Vulnerability and Adaptation Opportunities." [In English]. *Pacific Conservation Biology* 17, no. 3 (2011): 201-19.
- Jensen, A. E., and K. F. Walker. "A River in Crisis: The Lower River Murray, Australia." In *River Conservation and Management*, 357-69: John Wiley and Sons, 2012.
- Johansen, J. L., V. Messmer, D. J. Coker, A. S. Hoey, and M. S. Pratchett. "Increasing Ocean Temperatures Reduce Activity Patterns of a Large Commercially Important Coral Reef Fish." [In English]. *Global Change Biology* 20, no. 4 (Apr 2014): 1067-74.
- Johnson, C. R., S. C. Banks, N. S. Barrett, F. Cazassus, P. K. Dunstan, G. J. Edgar, S. D. Frusher, *et al.* "Climate Change Cascades: Shifts in Oceanography, Species' Ranges and Subtidal Marine Community Dynamics in Eastern Tasmania." [In English]. *Journal of Experimental Marine Biology and Ecology* 400, no. 1-2 (2011): 17-32.
- Johnson, J. E., and N. J. Holbrook. "Adaptation of Australia's Marine Ecosystems to Climate Change: Using Science to Inform Conservation Management." [In English]. *International Journal of Ecology* 2014 (2014): 1-12.
- Johnson, J. E., D. J. Welch, J. A. Maynard, J. D. Bell, G. Pecl, J. Robins, and T. Saunders. "Assessing and Reducing Vulnerability to Climate Change: Moving from Theory to Practical Decision-Support." *Marine Policy* 74 (2016): 220-29.
- Johnson, M. S. "Thirty-Four Years of Climatic Selection in the Land Snail *Theba Pisana*." [In English]. *Heredity* 106, no. 5 (2011): 741-48.

- Johnson, P. L., M. Negnevitsky, and K. M. Muttaqi. "Short Term Wind Power Forecasting Using Adaptive Neuro-Fuzzy Inference Systems." Paper presented at the 2007 Australasian Universities Power Engineering, AUPEC, Perth, WA, 2007.
- Jones, A. R., C. M. Bull, B. W. Brook, K. Wells, K. H. Pollock, and D. A. Fordham. "Tick Exposure and Extreme Climate Events Impact Survival and Threaten the Persistence of a Long-Lived Lizard." *Journal of Animal Ecology* 85, no. 2 (Mar 2016): 598-610.
- Jones, A. R., W. Gladstone, and N. J. Hacking. "Australian Sandy-Beach Ecosystems and Climate Change: Ecology and Management." [In English]. *Australian Zoologist* 34, no. 2 (2007): 190-202.
- Jones, M., W. Williams, and J. Stillman. "The Evolution of Asset Management in the Water Industry." *Journal - American Water Works Association* 106, no. 1 (2014): 140-48.
- Jones, R. N. "Detecting and Attributing Nonlinear Anthropogenic Regional Warming in Southeastern Australia." [In English]. *Journal of Geophysical Research: Atmospheres* 117, no. 4 (2012).
- Jones, R. N., P. Dettmann, G. Park, M. Rogers, and T. White. "The Relationship between Adaptation and Mitigation in Managing Climate Change Risks: A Regional Response from North Central Victoria, Australia." [In English]. *Mitigation and Adaptation Strategies for Global Change* 12, no. 5 (2007): 685-712.
- Jones, S. "A Tale of Two Cities: Climate Change Policies in Vancouver and Melbourne - Barometers of Cooperative Federalism?" [In English]. *International Journal of Urban and Regional Research* 36, no. 6 (2012): 1242-67.
- . "Flirting with Climate Change: A Comparative Policy Analysis of Subnational Governments in Canada and Australia." [In English]. *Journal of Comparative Policy Analysis: Research and Practice* 16, no. 5 (2014): 424-40.
- Jordan, R., A. A. Hoffmann, S. K. Dillon, and S. M. Prober. "Evidence of Genomic Adaptation to Climate in *Eucalyptus Microcarpa*: Implications for Adaptive Potential to Projected Climate Change." *Molecular Ecology* 26, no. 21 (Nov 2017): 6002-20.
- Joshi, S. R., M. Vielle, F. Babonneau, N. R. Edwards, and P. B. Holden. "Physical and Economic Consequences of Sea-Level Rise: A Coupled Gis and Cge Analysis under Uncertainties." *Environmental and Resource Economics* 65, no. 4 (2016): 813-39.
- Kapun, M., D. K. Fabian, J. Goudet, and T. Flatt. "Genomic Evidence for Adaptive Inversion Clines in *Drosophila Melanogaster*." *Molecular Biology and Evolution* 33, no. 5 (May 2016): 1317-36.
- Kapun, M., C. Schmidt, E. Durmaz, P. S. Schmidt, and T. Flatt. "Parallel Effects of the Inversion in(3r)Payne on Body Size across the North American and Australian Clines in *Drosophila Melanogaster*." *Journal of Evolutionary Biology* 29, no. 5 (May 2016): 1059-72.
- Kear, B. P., N. I. Schroeder, and M. S. Y. Lee. "An Archaic Crested Plesiosaur in Opal from the Lower Cretaceous High-Latitude Deposits of Australia." [In English]. *Biology Letters* 2, no. 4 (2006): 615-19.
- Kearns, A. M., L. Joseph, and L. G. Cook. "A Multilocus Coalescent Analysis of the Speciation History of the Australo-Papuan Butcherbirds and Their Allies." [In English]. *Molecular Phylogenetics and Evolution* 66, no. 3 (2013): 941-52.
- Keenan, R. J. "Climate Change and Australian Production Forests: Impacts and Adaptation." *Australian Forestry* 80, no. 4 (2017): 197-207.
- Keenan, R. J., and C. Nitschke. "Forest Management Options for Adaptation to Climate Change: A Case Study of Tall, Wet Eucalypt Forests in Victoria's Central Highlands Region." *Australian Forestry* 79, no. 2 (2016): 96-107.
- Keighley, T., T. Longden, S. Mathew, and S. Trück. "Quantifying Catastrophic and Climate Impacted

- Hazards Based on Local Expert Opinions." *Journal of Environmental Management* 205 (Jan 1 2018): 262-73.
- Keith, D. A., J. Elith, and C. C. Simpson. "Predicting Distribution Changes of a Mire Ecosystem under Future Climates." [In English]. *Diversity and Distributions* 20, no. 4 (2014): 440-54.
- Keith, D. A., S. Rodoreda, and M. Bedward. "Decadal Change in Wetland-Woodland Boundaries During the Late 20th Century Reflects Climatic Trends." [In English]. *Global Change Biology* 16, no. 8 (2010): 2300-06.
- Kellermann, V., A. A. Hoffmann, T. N. Kristensen, N. N. Moghadam, and V. Loeschke. "Experimental Evolution under Fluctuating Thermal Conditions Does Not Reproduce Patterns of Adaptive Clinal Differentiation in *Drosophila Melanogaster*." *American Naturalist* 186, no. 5 (Nov 2015): 582-93.
- Kelley, D. I., and S. P. Harrison. "Enhanced Australian Carbon Sink Despite Increased Wildfire During the 21st Century." *Environmental Research Letters* 9, no. 10 (2014).
- Keremane, G. "Water-Sensitive Cities to Respond to Climate Change: A Case Study in Adelaide, Australia." Chap. Chapter 17 In *Managing Water Resources under Climate Uncertainty: Examples from Asia, Europe, Latin America, and Australia*, 359-76, 2015.
- Khan, S. J., D. Deere, F. D. L. Leusch, A. Humpage, M. Jenkins, and D. Cunliffe. "Extreme Weather Events: Should Drinking Water Quality Management Systems Adapt to Changing Risk Profiles?." *Water Research* 85 (Nov 15 2015): 124-36.
- Kharrat-Souissi, A., A. Baumel, F. Torre, and M. Chaieb. "Genetic Differentiation of the Dominant Perennial Grass *Cenchrus Ciliaris* L. Contributes to Response to Water Deficit in Arid Lands." *Rangeland Journal* 34, no. 1 (2012): 55-62.
- Khormi, H. M., and L. Kumar. "Climate Change and the Potential Global Distribution of *Aedes Aegypti*: Spatial Modelling Using Geographical Information System and Climex." [In English]. *Geospatial Health* 8, no. 2 (2014): 405-15.
- Kiem, A. S. "Water Trading as a Climate Change Adaptation Strategy - Will We Be Happy If the Objective Is Achieved?" Paper presented at the Proceedings of the 34th Hydrology and Water Resources Symposium, HWRS 2012, 2012.
- . "Understanding and Adapting to Flood Risk in a Variable and Changing Climate." Paper presented at the IAHS-AISH Proceedings and Reports, 2014.
- Kiem, A. S., E. K. Austin, and D. C. Verdon-Kidd. "Water Resource Management in a Variable and Changing Climate: Hypothetical Case Study to Explore Decision Making under Uncertainty." *Journal of Water and Climate Change* 7, no. 2 (2016): 263-79.
- Kiem, A. S., and D. C. Verdon-Kidd. "On the Relationship between Site Specific Australian Flood Risk and Natural Variability in the Pacific, Indian and Southern Oceans." Paper presented at the Proceedings of the 34th Hydrology and Water Resources Symposium, HWRS 2012, 2012.
- . "The Importance of Understanding Drivers of Hydroclimatic Variability for Robust Flood Risk Planning in the Coastal Zone." [In English]. *Australian Journal of Water Resources* 17, no. 2 (2013): 126-34.
- Kilbane, S. "Green Infrastructure: Planning a National Green Network for Australia." Paper presented at the 49th World Congress of the International Federation of Landscape Architects, IFLA 2012, 2012.
- King, D., Y. Gurtner, A. Firdaus, S. Harwood, and A. Cottrell. "Land Use Planning for Disaster Risk Reduction and Climate Change Adaptation: Operationalizing Policy and Legislation at Local Levels." *International Journal of Disaster Resilience in the Built Environment* 7, no. 2 (2016): 158-72.

- Kingsford, R. T., and J. E. M. Watson. "Climate Change in Oceania - a Synthesis of Biodiversity Impacts and Adaptations." [In English]. *Pacific Conservation Biology* 17, no. 3 (2011): 270-84.
- Koehn, J. D., A. J. Hobday, M. S. Pratchett, and B. M. Gillanders. "Climate Change and Australian Marine and Freshwater Environments, Fishes and Fisheries: Synthesis and Options for Adaptation." [In English]. *Marine and Freshwater Research* 62, no. 9 (2011): 1148-64.
- Konarzewski, T. K., B. R. Murray, and R. C. Godfree. "Rapid Development of Adaptive, Climate-Driven Clinal Variation in Seed Mass in the Invasive Annual Forb *Echium Plantagineum* L." [In English]. *PLoS ONE* 7, no. 12 (2012).
- Kriticos, D. J., M. S. Watt, K. J. B. Potter, L. K. Manning, N. S. Alexander, and N. Tallent-Halsell. "Managing Invasive Weeds under Climate Change: Considering the Current and Potential Future Distribution of *Buddleja Davidii*." [In English]. *Weed Research* 51, no. 1 (2011): 85-96.
- Kuleshov, Y., C. Spillman, Y. Wang, A. Charles, R. De Wit, K. Shelton, D. Jones, *et al.* "Seasonal Prediction of Climate Extremes for the Pacific: Tropical Cyclones and Extreme Ocean Temperatures." [In English]. *Journal of Marine Science and Technology (Taiwan)* 20, no. 6 (2012): 675-83.
- Kuruppu, N., P. Mukheibir, and J. Murta. "Ensuring Small Business Continuity under a Changing Climate: The Role of Adaptive Capacity." In *Applied Studies in Climate Adaptation*, 429-36, 2014.
- La Vergne, L. "Learning About Climate Change: A Case Study of Grain Growers in Eastern Australia." Chap. Chapter 4 In *Vulnerability of Agriculture, Water and Fisheries to Climate Change: Toward Sustainable Adaptation Strategies*, 53-70, 2014.
- LaJeunesse, T. C., D. T. Pettay, E. M. Sampayo, N. Phongsuwan, B. Brown, D. O. Obura, O. Hoegh-Guldberg, and W. K. Fitt. "Long-Standing Environmental Conditions, Geographic Isolation and Host-Symbiont Specificity Influence the Relative Ecological Dominance and Genetic Diversification of Coral Endosymbionts in the Genus *Symbiodinium*." [In English]. *Journal of Biogeography* 37, no. 5 (2010): 785-800.
- Lankester, A. "Self-Perceived Roles in Life and Achieving Sustainability on Family Farms in North-Eastern Australia." [In English]. *Australian Geographer* 43, no. 3 (2012): 233-51.
- Lawson, J. R., K. A. Fryirs, and M. R. Leishman. "Interactive Effects of Waterlogging and Atmospheric CO<sub>2</sub> Concentration on Gas Exchange, Growth and Functional Traits of Australian Riparian Tree Seedlings." *Ecohydrology* 10, no. 3 (2017).
- Leal Filho, W., L. Echevarria Icaza, A. Neht, M. Klavins, and E. A. Morgan. "Coping with the Impacts of Urban Heat Islands. A Literature Based Study on Understanding Urban Heat Vulnerability and the Need for Resilience in Cities in a Global Climate Change Context." *Journal of Cleaner Production* 171 (2018): 1140-49.
- Lee, J. G. H., H. C. Finn, and M. C. Calver. "Ecology of Black Cockatoos at a Mine-Site in the Eastern Jarrah-Marri Forest, Western Australia." [In English]. *Pacific Conservation Biology* 19, no. 1 (2013): 76-90.
- Lee, J. M., A. J. Clark, and J. R. Roche. "Climate-Change Effects and Adaptation Options for Temperate Pasture-Based Dairy Farming Systems: A Review." *Grass and Forage Science* 68, no. 4 (2013): 485-503.
- Lehmann, S. "Sustainability on the Urban Scale: 'Green Urbanism'-Mark II." [In English]. *Journal of Green Building* 2, no. 3 (2007): 61-78.
- Leigh, C., M. A. Burford, R. M. Connolly, J. M. Olley, E. Saeck, F. Sheldon, J. C. R. Smart, and S. E. Bunn. "Science to Support Management of Receiving Waters in an Event-Driven Ecosystem: From Land to River to Sea." [In English]. *Water (Switzerland)* 5, no. 2 (2013): 780-97.

- Leijds, R., T. Bradford, J. G. Mitchell, W. F. Humphreys, S. J. B. Cooper, P. Goonan, and R. A. King. "The Evolution of Epigeal and Stygobitic Species of *Koonunga* Sayce, 1907 (Syncarida: Anaspidacea) in Southern Australia, with the Description of Three New Species." *PLoS ONE* 10, no. 8 (2015): e0134673.
- Leith, P., and F. Vanclay. "Placing Science for Natural Resource Management and Climate Variability: Lessons from Narratives of Risk, Place and Identity." *Sociologia Ruralis* 57, no. 2 (2017): 155-70.
- Leonard, S., and M. Parsons. "Cultural Dimensions of Climate Change Adaptation: Indigenous Knowledge and Future Adaptive Management in East Kimberley, Australia." In *Climate Adaptation Futures*, 190-99: John Wiley and Sons, 2013.
- Lewis, J. D., N. G. Phillips, B. A. Logan, C. R. Hricko, and D. T. Tissue. "Leaf Photosynthesis, Respiration and Stomatal Conductance in Six Eucalyptus Species Native to Mesic and Xeric Environments Growing in a Common Garden." [In English]. *Tree Physiology* 31, no. 9 (2011): 997-1006.
- Lewis, S. C., D. J. Karoly, and M. Yu. "Quantitative Estimates of Anthropogenic Contributions to Extreme National and State Monthly, Seasonal and Annual Average Temperatures for Australia." *Australian Meteorological and Oceanographic Journal* 64, no. 3 (2014): 215-30.
- Li, F., P. C. Sutton, S. J. Anderson, and H. Nouri. "Planning Green Space in Adelaide City: Enlightenment from Green Space System Planning of Fuzhou City (2015–2020)." *Australian Planner* 54, no. 2 (2017): 126-33.
- Li, P., X. Zhao, Z. Cheng, K. H. M. Siddique, N. C. Turner, F. Li, G. Yan, and Y. Xiong. "Overview on the 2nd International Workshop on Ecosystem Assessment and Management (Eam)." [In English; Chinese]. *Shengtai Xuebao/ Acta Ecologica Sinica* 31, no. 9 (2011): 2349-55.
- Lin, B. B., J. Meyers, R. M. Beatty, and G. B. Barnett. "Urban Green Infrastructure Impacts on Climate Regulation Services in Sydney, Australia." *Sustainability (Switzerland)* 8, no. 8 (2016).
- Lindenmayer, D. B., G. E. Likens, A. Andersen, D. Bowman, C. M. Bull, E. Burns, C. R. Dickman, *et al.* "Value of Long-Term Ecological Studies." [In English]. *Austral Ecology* 37, no. 7 (2012): 745-57.
- Lindsay, J., A. J. Dean, and S. Supski. "Responding to the Millennium Drought: Comparing Domestic Water Cultures in Three Australian Cities." *Regional Environmental Change* 17, no. 2 (2017): 565-77.
- Ling, S. D., C. R. Johnson, S. Frusher, and C. K. King. "Reproductive Potential of a Marine Ecosystem Engineer at the Edge of a Newly Expanded Range." [In English]. *Global Change Biology* 14, no. 4 (2008): 907-15.
- Ling, S. D., C. R. Johnson, S. D. Frusher, and K. R. Ridgway. "Overfishing Reduces Resilience of Kelp Beds to Climate-Driven Catastrophic Phase Shift." [In English]. *Proceedings of the National Academy of Sciences of the United States of America* 106, no. 52 (2009): 22341-45.
- Little, L. R., and B. B. Lin. "A Decision Analysis Approach to Climate Adaptation: A Structured Method to Consider Multiple Options." *Mitigation and Adaptation Strategies for Global Change* 22, no. 1 (2017): 15-28.
- Llewelyn, J., S. L. Macdonald, A. Hatcher, C. Moritz, and B. L. Phillips. "Intraspecific Variation in Climate-Relevant Traits in a Tropical Rainforest Lizard." *Diversity and Distributions* 22, no. 10 (2016): 1000-12.
- Lo, A. Y. "The Right to Doubt: Climate-Change Scepticism and Asserted Rights to Private Property." [In English]. *Environmental Politics* 23, no. 4 (2014): 549-69.
- Lobell, D. B., G. L. Hammer, K. Chenu, B. Zheng, G. McLean, and S. C. Chapman. "The Shifting

- Influence of Drought and Heat Stress for Crops in Northeast Australia." *Global Change Biology* 21, no. 11 (Nov 2015): 4115-27.
- Loosemore, M., J. Carthey, V. Chandra, and A. M. Chand. "Risk Management of Extreme Weather Events: A Case Study of Coffs Harbour Base Hospital, Australia." Paper presented at the 26th Annual Conference of the Association of Researchers in Construction Management, ARCOM 2010, Leeds, 2010.
- Loosemore, M., V. Chow, and D. McGeorge. "Managing the Health Risks of Extreme Weather Events by Managing Hospital Infrastructure." [In English]. *Engineering, Construction and Architectural Management* 21, no. 1 (2014): 4-32.
- Loosemore, M., V. W. Chow, J. Carthey, and D. McGeorge. "The Adaptive Capacity of Hospital Facilities to Cope with the Risk of Disasters Caused by Extreme Weather Events: A Case Study Approach." Paper presented at the Royal Institution of Chartered Surveyors International Research Conference, COBRA 2011, Salford, 2011.
- Lord, D. B., and A. D. Gordon. "Local Government Adapting to Climate Change - Where the Rubber Hits the Road." Paper presented at the 20th Australasian Coastal and Ocean Engineering Conference 2011, COASTS 2011 and the 13th Australasian Port and Harbour Conference 2011, PORTS 2011, Perth, WA, 2011.
- Love, P., and P. A. Bullen. "Toward the Sustainable Adaptation of Existing Facilities." [In English]. *Facilities* 27, no. 9-10 (2009): 357-67.
- Lowe, K., J. G. Castley, and J. M. Hero. "Resilience to Climate Change: Complex Relationships among Wetland Hydroperiod, Larval Amphibians and Aquatic Predators in Temporary Wetlands." *Marine and Freshwater Research* 66, no. 10 (2015): 886-99.
- Ludwig, F., and S. Asseng. "Climate Change Impacts on Wheat Production in a Mediterranean Environment in Western Australia." [In English]. *Agricultural Systems* 90, no. 1-3 (2006): 159-79.
- . "Potential Benefits of Early Vigor and Changes in Phenology in Wheat to Adapt to Warmer and Drier Climates." [In English]. *Agricultural Systems* 103, no. 3 (2010): 127-36.
- Lukasiewicz, A., J. Pittock, and C. M. Finlayson. "Are We Adapting to Climate Change? A Catchment-Based Adaptation Assessment Tool for Freshwater Ecosystems." *Climatic Change* 138, no. 3-4 (2016): 641-54.
- Lunney, D., M. Predavec, I. Sonawane, R. Kavanagh, G. Barrott-Brown, S. Phillips, J. Callaghan, *et al.* "The Remaining Koalas (*Phascolarctos Cinereus*) of the Pilliga Forests, North-West New South Wales: Refugial Persistence or a Population on the Road to Extinction?" *Pacific Conservation Biology* 23, no. 3 (2017): 277-94.
- Lunney, D., E. Stalenberg, T. Santika, and J. R. Rhodes. "Extinction in Eden: Identifying the Role of Climate Change in the Decline of the Koala in South-Eastern Nsw." [In English]. *Wildlife Research* 41, no. 1 (2014): 22-34.
- Luo, Q. "Necessity for Post-Processing Dynamically Downscaled Climate Projections for Impact and Adaptation Studies." *Stochastic Environmental Research and Risk Assessment* 30, no. 7 (2016): 1835-50.
- Luo, Q., M. Bange, and P. Devoil. "Effects of a Wheat Rotation on Cotton Production in a Changing Climate: A Simulation Study." *Climate Research* 70, no. 1 (2016): 29-38.
- Luo, Q., W. Bellotti, M. Williams, I. Cooper, and B. Bryan. "Risk Analysis of Possible Impacts of Climate Change on South Australian Wheat Production." [In English]. *Climatic Change* 85, no. 1-2 (2007): 89-101.
- Luo, Q., and L. Wen. "The Role of Climatic Variables in Winter Cereal Yields: A Retrospective



- Analysis." [In English]. *International Journal of Biometeorology* 59, no. 2 (Feb 2014): 181-92.
- Lyle, G. "Estimating the Spatial and Temporal Impacts of Climate Change on Rainfall Reliability: An Example in a Mediterranean Agricultural Region." [In English]. *Applied Geography* 45 (2013): 98-108.
- Lymbery, R. A., and J. P. Evans. "Genetic Variation Underlies Temperature Tolerance of Embryos in the Sea Urchin *Haliotis erythrogramma* Armigera." [In English]. *Journal of Evolutionary Biology* 26, no. 10 (2013): 2271-82.
- Lynam, T. "Exploring Social Representations of Adapting to Climate Change Using Topic Modeling and Bayesian Networks." *Ecology and Society* 21, no. 4 (2016).
- Lynch, A. H., C. E. Adler, and N. C. Howard. "Policy Diffusion in Arid Basin Water Management: A Q Method Approach in the Murray-Darling Basin, Australia." *Regional Environmental Change* 14, no. 4 (2014): 1601-13.
- Lynch, A. H., D. Griggs, L. Joachim, and J. Walker. "The Role of the Yorta Yorta People in Clarifying the Common Interest in Sustainable Management of the Murray-Darling Basin, Australia." [In English]. *Policy Sciences* 46, no. 2 (2013): 109-23.
- M'Baya, J., M. J. Blacket, and A. A. Hoffmann. "Genetic Structure of *Carex* Species from the Australian Alpine Region Along Elevation Gradients: Patterns of Reproduction and Gene Flow." [In English]. *International Journal of Plant Sciences* 174, no. 2 (2013): 189-99.
- Ma, X., A. Huete, Q. Yu, K. Davies, and N. R. Coupe. "Monitoring Spatial Patterns of Vegetation Phenology in an Australian Tropical Transect Using Modis Evi." Paper presented at the International Archives of the Photogrammetry, Remote Sensing and Spatial Information Sciences - ISPRS Archives, 2012.
- Maasar, M. A., and M. Anthonyrajah. "Carbon Pollution Reduction Scheme - Sustainability and Financial Response to Rio Tinto Group." Paper presented at the 2011 International Conference on Business, Engineering and Industrial Applications, ICBEIA 2011, Kuala Lumpur, 2011.
- MacGillivray, F., I. L. Hudson, and A. J. Lowe. "Herbarium Collections and Photographic Images: Alternative Data Sources for Phenological Research." In *Phenological Research: Methods for Environmental and Climate Change Analysis*, 425-61: Springer Netherlands, 2010.
- MacHunter, J., W. Wright, R. Loyn, and P. Rayment. "Bird Declines over 22 Years in Forest Remnants in Southeastern Australia: Evidence of Faunal Relaxation?" [In English]. *Canadian Journal of Forest Research* 36, no. 11 (2006): 2756-68.
- Macintosh, A. "Domestic Influences on the Howard Government's Climate Policy: Using the Past as a Guide to the Future." [In English]. *Asia Pacific Journal of Environmental Law* 11, no. 1-2 (2008): 51-84.
- . "The Garnaut Review's Targets and Trajectories: A Critique." [In English]. *Environmental and Planning Law Journal* 26, no. 2 (2009): 88-112.
- Macintosh, A., J. McDonald, and A. Foerster. "Designing Spatial Adaptation Planning Instruments." In *Applied Studies in Climate Adaptation*, 34-42, 2014.
- Mackey, B. G., J. E. M. Watson, G. Hope, and S. Gilmore. "Climate Change, Biodiversity Conservation, and the Role of Protected Areas: An Australian Perspective." [In English]. *Biodiversity* 9, no. 3-4 (2008): 11-18.
- Macreadie, P. I., S. M. Trevathan-Tackett, J. A. Baldock, and J. J. Kelleway. "Converting Beach-Cast Seagrass Wrack into Biochar: A Climate-Friendly Solution to a Coastal Problem." *Science of the Total Environment* 574 (Jan 1 2017): 90-94.
- Madin, E. M. P., N. C. Ban, Z. A. Doubleday, T. H. Holmes, G. T. Pecl, and F. Smith. "Socio-Economic and Management Implications of Range-Shifting Species in Marine Systems." [In English].

- Global Environmental Change* 22, no. 1 (2012): 137-46.
- Maheswaran, S., G. Kibria, and J. Martin. "Advances in Climate Change Impact Assessment for Sydney's Water Supply." Paper presented at the The Art and Science of Water - 36th Hydrology and Water Resources Symposium, HWRS 2015, 2015.
- Maina, J., T. R. McClanahan, V. Venus, M. Ateweberhan, and J. Madin. "Global Gradients of Coral Exposure to Environmental Stresses and Implications for Local Management." [In English]. *PLoS ONE* 6, no. 8 (2011).
- Maller, C. J., and Y. Strengers. "Housing, Heat Stress and Health in a Changing Climate: Promoting the Adaptive Capacity of Vulnerable Households, a Suggested Way Forward." [In English]. *Health Promotion International* 26, no. 4 (2011): 492-98.
- Manning, A. D., J. Fischer, A. Felton, B. Newell, W. Steffen, and D. B. Lindenmayer. "Landscape Fluidity - a Unifying Perspective for Understanding and Adapting to Global Change." [In English]. *Journal of Biogeography* 36, no. 2 (2009): 193-99.
- Mansergh, I. "North Central Victoria - Climate Change and Land-Use: Potentials for Third Century in a Timeless Land." [In English]. *Proceedings of the Royal Society of Victoria* 122, no. 2 (2010): 161-83.
- . "Perceptions of Weeds in Changing Contexts. Land-Use Change, Landscape Value Change and Climate Change in South-Eastern Australia: Adaptation to Change in the Third Century of the Timeless Land." [In English]. *Plant Protection Quarterly* 25, no. 4 (2010): 173-85.
- Mansergh, I., A. Lau, and R. Anderson. "Geographic Landscape Visualisation in Planning Adaptation to Climate Change in Victoria, Australia," Article, *Lecture Notes in Geoinformation and Cartography*(2008): 469-87. doi:10.1007/978-3-540-69168-6\_23.
- Mantyka-Pringle, C. S., T. G. Martin, D. B. Moffatt, J. Udy, J. Olley, N. Saxton, F. Sheldon, S. E. Bunn, and J. R. Rhodes. "Prioritizing Management Actions for the Conservation of Freshwater Biodiversity under Changing Climate and Land-Cover." *Biological Conservation* 197 (2016): 80-89.
- Marangos, J., and C. Williams. "The Effect of Drought on Uncertainty and Agricultural Investment in Australia." [In English]. *Journal of Post Keynesian Economics* 27, no. 4 (2005): 575-94.
- Marshall, G. R., and J. Alexandra. "Institutional Path Dependence and Environmental Water Recovery in Australia's Murray-Darling Basin." *Water Alternatives* 9, no. 3 (2016): 679-703.
- Martin, H. A. "Cenozoic Climatic Change and the Development of the Arid Vegetation in Australia." [In English]. *Journal of Arid Environments* 66, no. 3 SPEC. ISS. (2006): 533-63.
- Martin, N., and J. Rice. "Analysing Emission Intensive Firms as Regulatory Stakeholders: A Role for Adaptable Business Strategy." [In English]. *Business Strategy and the Environment* 19, no. 1 (2010): 64-75.
- Martins, C. S. C., C. A. Macdonald, I. C. Anderson, and B. K. Singh. "Feedback Responses of Soil Greenhouse Gas Emissions to Climate Change Are Modulated by Soil Characteristics in Dryland Ecosystems." *Soil Biology and Biochemistry* 100 (2016): 21-32.
- Marzinelli, E. M., S. B. Williams, R. C. Babcock, N. S. Barrett, C. R. Johnson, A. Jordan, G. A. Kendrick, *et al.* "Large-Scale Geographic Variation in Distribution and Abundance of Australian Deep-Water Kelp Forests." *PLoS ONE* 10, no. 2 (2015): e0118390.
- Marzloff, M. P., J. Melbourne-Thomas, K. G. Hamon, E. Hoshino, S. Jennings, I. E. van Putten, and G. T. Pecl. "Modelling Marine Community Responses to Climate-Driven Species Redistribution to Guide Monitoring and Adaptive Ecosystem-Based Management." *Global Change Biology* 22, no. 7 (Jul 2016): 2462-74.
- Mason, T. J., K. French, and K. Russell. "Are Competitive Effects of Native Species on an Invader

- Mediated by Water Availability?" [In English]. *Journal of Vegetation Science* 23, no. 4 (2012): 657-66.
- Massaro, A. J., J. B. Weisz, M. S. Hill, and N. S. Webster. "Behavioral and Morphological Changes Caused by Thermal Stress in the Great Barrier Reef Sponge *Rhopaloeides Odorabile*." [In English]. *Journal of Experimental Marine Biology and Ecology* 416-417 (2012): 55-60.
- Matthews, S., K. Nguyen, and J. L. McGregor. "Modelling Fuel Moisture under Climate Change." [In English]. *International Journal of Climate Change Strategies and Management* 3, no. 1 (2011): 6-15.
- Matthews, T. "Responding to Climate Change as a Transformative Stressor through Metro-Regional Planning." [In English]. *Local Environment* 17, no. 10 (2012): 1089-103.
- . "Institutional Perspectives on Operationalising Climate Adaptation through Planning." [In English]. *Planning Theory and Practice* 14, no. 2 (2013): 198-210.
- Maunsell, S. C., R. L. Kitching, C. J. Burwell, and R. J. Morris. "Changes in Host-Parasitoid Food Web Structure with Elevation." *Journal of Animal Ecology* 84, no. 2 (Mar 2015): 353-63.
- Maynard, J. A., K. R. N. Anthony, P. A. Marshall, and I. Masiri. "Major Bleaching Events Can Lead to Increased Thermal Tolerance in Corals." [In English]. *Marine Biology* 155, no. 2 (2008): 173-82.
- McAlpine, C. A., J. Syktus, J. G. Ryan, R. C. Deo, G. M. McKeon, H. A. McGowan, and S. R. Phinn. "A Continent under Stress: Interactions, Feedbacks and Risks Associated with Impact of Modified Land Cover on Australia's Climate." [In English]. *Global Change Biology* 15, no. 9 (2009): 2206-23.
- McAneney, J., R. Crompton, R. Musulin, G. Walker, D. McAneney, and R. Pielke. "Reflections on Disaster Loss Trends, Global Climate Change and Insurance." In *Applied Studies in Climate Adaptation*, 26-33, 2014.
- McCairns, R. J. S., S. Smith, M. Sasaki, L. Bernatchez, and L. B. Beheregaray. "The Adaptive Potential of Subtropical Rainbowfish in the Face of Climate Change: Heritability and Heritable Plasticity for the Expression of Candidate Genes." *Evolutionary Applications* 9, no. 4 (Apr 2016): 531-45.
- McCallum, K. P., G. R. Guerin, M. F. Breed, and A. J. Lowe. "Combining Population Genetics, Species Distribution Modelling and Field Assessments to Understand a Species Vulnerability to Climate Change." [In English]. *Austral Ecology* 39, no. 1 (2014): 17-28.
- McCormack, P., and J. McDonald. "Adaptation Strategies for Biodiversity Conservation: Has Australian Law Got What It Takes?". *Environmental and Planning Law Journal* 31, no. PART 2 (2014): 114-36.
- McDonald, J. "A Short History of Climate Adaptation Law in Australia." [In English]. *Climate Law* 4, no. 1-2 (2014): 150-67.
- McDonald, J., P. C. McCormack, A. J. Fleming, R. M. B. Harris, and M. Lockwood. "Rethinking Legal Objectives for Climate-Adaptive Conservation." *Ecology and Society* 21, no. 2 (2016).
- McElroy, K. "Herbal Medicine Practice: Future Environmental Impacts." [In English]. *Australian Journal of Medical Herbalism* 23, no. 4 (2011): 164-67.
- McEvoy, D., H. Fünfgeld, and K. Bosomworth. "Resilience and Climate Change Adaptation: The Importance of Framing." [In English]. *Planning Practice and Research* 28, no. 3 (2013): 280-93.
- McFarlane, D., M. Strawbridge, R. Stone, and A. Paton. "Managing Groundwater Levels in the Face of Uncertainty and Change: A Case Study from Gngangara." In *Water Science and Technology: Water Supply*, 321-28, 2012.
- McGee, J., and R. Taplin. "The Role of the Asia Pacific Partnership in Discursive Contestation of the International Climate Regime." [In English]. *International Environmental Agreements: Politics, Law and Economics* 9, no. 3 (2009): 213-38.

- McGowan, S. A., and R. G. V. Baker. "How Past Sea-Level Changes Can Inform Future Planning: A Case Study from the Macleay River Estuary, New South Wales, Australia." [In English]. *Holocene* 24, no. 11 (2014): 1591-601.
- McHenry, M. P. "Agricultural Bio-Char Production, Renewable Energy Generation and Farm Carbon Sequestration in Western Australia: Certainty, Uncertainty and Risk." [In English]. *Agriculture, Ecosystems and Environment* 129, no. 1-3 (2009): 1-7.
- . "Practicalities of Establishing Forestry Carbon Sequestration Projects in the Agricultural Sector: A Technical and Economic Analysis with Implications." In *Carbon Sequestration: Technology, Measurement Techniques and Environmental Effects*, 37-66: Nova Science Publishers, Inc., 2012.
- . "Small-Scale ( $\leq 6$  Kwe) Stand-Alone and Grid-Connected Photovoltaic, Wind, Hydroelectric, Biodiesel, and Wood Gasification System's Simulated Technical, Economic, and Mitigation Analyses for Rural Regions in Western Australia." [In English]. *Renewable Energy* 38, no. 1 (2012): 195-205.
- McIlgorm, A., S. Hanna, G. Knapp, P. Le Floc'H, F. Millerd, and M. Pan. "How Will Climate Change Alter Fishery Governance {Glottal Stop} Insights from Seven International Case Studies." [In English]. *Marine Policy* 34, no. 1 (2010): 170-77.
- McInnes, K. L., J. Church, D. Monselesan, J. R. Hunter, J. G. O'Grady, I. D. Haigh, and X. Zhang. "Information for Australian Impact and Adaptation Planning in Response to Sea-Level Rise." *Australian Meteorological and Oceanographic Journal* 65, no. 1 (2015): 127-49.
- McInnes, K. L., I. Macadam, G. Hubbert, and J. O'Grady. "An Assessment of Current and Future Vulnerability to Coastal Inundation Due to Sea-Level Extremes in Victoria, Southeast Australia." [In English]. *International Journal of Climatology* 33, no. 1 (2013): 33-47.
- McIntyre, S. "Ecological and Anthropomorphic Factors Permitting Low-Risk Assisted Colonization in Temperate Grassy Woodlands." [In English]. *Biological Conservation* 144, no. 6 (2011): 1781-89.
- McIntyre-Mills, J., and N. Binchai. "Being, Having, Doing and Interacting: Towards Ethical Democracy, Governance and Stewardship." Paper presented at the 57th Annual Meeting of the International Society for the Systems Sciences: Curating the Conditions for a Thrivable Planet, ISSS 2013, Hai Phong City, 2013.
- McKechnie, A. E., P. A. R. Hockey, and B. O. Wolf. "Feeling the Heat: Australian Landbirds and Climate Change." *Emu* 112, no. 2 (2012): i-vii.
- McKellar, R., G. F. Midgley, C. J. Yates, I. Abbott, P. Gioia, and D. Le Maitre. "The Need to Develop a Coherent Research Approach for Climate Change Vulnerability Impact Assessment and Adaptation in High-Biodiversity Terrestrial Ecosystems." [In English]. *Austral Ecology* 35, no. 4 (2010): 371-73.
- McKeon, G. M., G. S. Stone, J. I. Syktus, J. O. Carter, N. R. Flood, D. G. Ahrens, D. N. Bruget, *et al.* "Climate Change Impacts on Northern Australian Rangeland Livestock Carrying Capacity: A Review of Issues." [In English]. *Rangeland Journal* 31, no. 1 (2009): 1-29.
- McLean, E. H., S. M. Prober, W. D. Stock, D. A. Steane, B. M. Potts, R. E. Vaillancourt, and M. Byrne. "Plasticity of Functional Traits Varies Clinally Along a Rainfall Gradient in *Eucalyptus Tricarpa*." [In English]. *Plant, Cell and Environment* 37, no. 6 (Jun 2014): 1440-51.
- McLeish, M. J., T. W. Chapman, and M. P. Schwarz. "Host-Driven Diversification of Gall-Inducing *Acacia* Thrips and the Aridification of Australia." [In English]. *BMC Biology* 5 (2007).
- McWethy, D. B., S. G. Haberle, F. Hopf, and D. M. J. S. Bowman. "Aboriginal Impacts on Fire and Vegetation on a Tasmanian Island." *Journal of Biogeography* 44, no. 6 (2017): 1319-30.

- Mehran, A., O. Mazdiyasi, and A. AghaKouchak. "A Hybrid Framework for Assessing Socioeconomic Drought: Linking Climate Variability, Local Resilience, and Demand." *Journal of Geophysical Research* 120, no. 15 (2015): 7520-33.
- Mehrotra, S., J. Carmin, A. Fenech, H. Fünfgeld, Y. Labane, J. Li, R. Roggema, F. Thomalla, and C. Rosenzweig. "Adapting to Climate Change in Cities." In *Climate Adaptation Futures*, 309-21: John Wiley and Sons, 2013.
- Meinke, H., M. Howden, and R. Nelson. "Integrated Assessments of Climate Variability and Change for Australian Agriculture - Connecting the Islands of Knowledge." Paper presented at the 3rd Biennial Meeting of the International Environmental Modelling and Software Society: Summit on Environmental Modelling and Software, iEMSs 2006, Burlington, VT, 2006.
- Mellick, R. "Climate Change and an Australian Rainforest Conifer." In *Advances in Environmental Research*, 213-66, 2014.
- Micevski, T., and G. R. Willgoose. "Towards the Development of Flood Vulnerability Curves for Urbanised Areas in Australia." Paper presented at the Hydrology and Water Resources Symposium 2014, HWRS 2014 - Conference Proceedings, 2014.
- Mieog, J. C., J. L. Olsen, R. Berkelmans, S. A. Bleuler-Martinez, B. L. Willis, and M. J. H. van Oppen. "The Roles and Interactions of Symbiont, Host and Environment in Defining Coral Fitness." [In English]. *PLoS ONE* 4, no. 7 (2009).
- Miller, G. H., M. L. Fogel, J. W. Magee, and M. K. Gagan. "Disentangling the Impacts of Climate and Human Colonization on the Flora and Fauna of the Australian Arid Zone over the Past 100 Ka Using Stable Isotopes in Avian Eggshell." *Quaternary Science Reviews* 151 (2016): 27-57.
- Miller, G. H., M. L. Fogel, J. W. Magee, M. K. Gagan, S. J. Clarke, and B. J. Johnson. "Anthropology: Ecosystem Collapse in Pleistocene Australia and a Human Role in Megafaunal Extinction." [In English]. *Science* 309, no. 5732 (2005): 287-90.
- Miller, G. H., J. W. Magee, M. L. Fogel, and M. K. Gagan. "Detecting Human Impacts on the Flora, Fauna, and Summer Monsoon of Pleistocene Australia." [In English]. *Climate of the Past* 3, no. 3 (2007): 463-73.
- Mitchell, A. L., A. Milne, I. Tapley, K. Lowell, P. Caccetta, E. Lehmann, Z. S. Zhou, and A. Held. "Interoperability of Radar and Optical Data for Forest Information Assessment." Paper presented at the 2011 IEEE International Geoscience and Remote Sensing Symposium, IGARSS 2011, Vancouver, BC, 2011.
- Mitchell, M., M. Lockwood, S. A. Moore, and S. Clement. "Scenario Analysis for Biodiversity Conservation: A Social-Ecological System Approach in the Australian Alps." *Journal of Environmental Management* 150 (Mar 1 2015): 69-80.
- Mitchell, P. J., and A. P. O'Grady. "Adaptation of Leaf Water Relations to Climatic and Habitat Water Availability." *Forests* 6, no. 7 (2015): 2281-95.
- Mo, J., M. Stevens, and D. L. Liu. "A Temperature-Driven Daily Process Model for Onion Thrips Populations in Onions." Paper presented at the 18th World IMACS Congress and International Congress on Modelling and Simulation: Interfacing Modelling and Simulation with Mathematical and Computational Sciences, MODSIM09, Cairns, QLD, 2009.
- Moglia, M., A. L. Grant, and M. P. Inman. "Estimating the Effect of Climate on Water Demand: Towards Strategic Policy Analysis." [In English]. *Australian Journal of Water Resources* 13, no. 2 (2009): 81-94.
- Moore, A. D., and A. Ghahramani. "Climate Change and Broadacre Livestock Production across Southern Australia. 3. Adaptation Options Via Livestock Genetic Improvement." [In English]. *Animal Production Science* 54, no. 2 (2014): 111-24.

- Moore, G. M. "Adaptations of Australian Tree Species Relevant to Water Scarcity in the Urban Forest." [In English]. *Arboriculture and Urban Forestry* 39, no. 3 (2013): 109-15.
- Morgan, R. A. "Histories for an Uncertain Future: Environmental History and Climate Change." [In English]. *Australian Historical Studies* 44, no. 3 (2013): 350-60.
- Moritz, M. A., E. Batllori, R. A. Bradstock, A. M. Gill, J. Handmer, P. F. Hessburg, J. Leonard, *et al.* "Learning to Coexist with Wildfire." *Nature* 515, no. 7525 (Nov 6 2014): 58-66.
- Morrison, C., and C. Pickering. "Limits to Climate Change Adaptation: Case Study of the Australian Alps." [In English]. *Geographical Research* 51, no. 1 (2013): 11-25.
- Morrissey, S. A., and J. P. Reser. "Natural Disasters, Climate Change and Mental Health Considerations for Rural Australia." [In English]. *Australian Journal of Rural Health* 15, no. 2 (2007): 120-25.
- Morrongiello, J. R., S. J. Beatty, J. C. Bennett, D. A. Crook, D. N. E. N. Ikedife, M. J. Kennard, A. Kerezszy, *et al.* "Climate Change and Its Implications for Australia's Freshwater Fish." [In English]. *Marine and Freshwater Research* 62, no. 9 (2011): 1082-98.
- Morrongiello, J. R., R. E. Thresher, and N. T. Hobbs. "A Statistical Framework to Explore Ontogenetic Growth Variation among Individuals and Populations: A Marine Fish Example." *Ecological Monographs* 85, no. 1 (2015): 93-115.
- Morton, J. "Agricultural Adaptations: Social Context and Complexity." In *Applied Studies in Climate Adaptation*, 117-21, 2014.
- Moser, S. C. "Raising the Seas, Rising to Greatness? Meeting the Challenge of Coastal Climate Change." In *Applied Studies in Climate Adaptation*, 175-80, 2014.
- Moyle, B. D., C. L. J. McLennan, L. Ruhanen, and B. Weiler. "Tracking the Concept of Sustainability in Australian Tourism Policy and Planning Documents." [In English]. *Journal of Sustainable Tourism* 22, no. 7 (2014): 1037-51.
- Mpelasoka, F., K. Hennessy, R. Jones, and B. Bates. "Comparison of Suitable Drought Indices for Climate Change Impacts Assessment over Australia Towards Resource Management." [In English]. *International Journal of Climatology* 28, no. 10 (2008): 1283-92.
- Mu, S. J., Y. Z. Chen, J. L. Li, W. M. Ju, I. O. A. Odeh, and X. L. Zou. "Grassland Dynamics in Response to Climate Change and Human Activities in Inner Mongolia, China between 1985 and 2009." [In English]. *Rangeland Journal* 35, no. 3 (2013): 315-29.
- Mullett, J., and D. McEvoy. "Climate Resilient Seaports." Paper presented at the 20th Australasian Coastal and Ocean Engineering Conference 2011, COASTS 2011 and the 13th Australasian Port and Harbour Conference 2011, PORTS 2011, Perth, WA, 2011.
- Mulligan, M. J. "Towards a More Grounded and Dynamic Sociology of Climate-Change Adaptation." [In English]. *Environmental Values* 23, no. 2 (2014): 165-80.
- Muñoz, M. M., G. M. Langham, M. C. Brandley, D. F. Rosauer, S. E. Williams, and C. Moritz. "Basking Behavior Predicts the Evolution of Heat Tolerance in Australian Rainforest Lizards." *Evolution* 70, no. 11 (Nov 2016): 2537-49.
- Murphy, H. T., D. J. Metcalfe, M. G. Bradford, and A. J. Ford. "Community Divergence in a Tropical Forest Following a Severe Cyclone." [In English]. *Austral Ecology* 39, no. 6 (2014): 696-709.
- Murray, J. V., K. E. Stokes, and R. D. van Klinken. "Predicting the Potential Distribution of a Riparian Invasive Plant: The Effects of Changing Climate, Flood Regimes and Land-Use Patterns." [In English]. *Global Change Biology* 18, no. 5 (2012): 1738-53.
- Myers, S. A., S. Donnellan, and S. Kleindorfe. "Rainfall Can Explain Adaptive Phenotypic Variation with High Gene Flow in the New Holland Honeyeater (*Phylidonyris Novaehollandiae*)." [In English]. *Ecology and Evolution* 2, no. 10 (2012): 2397-412.
- Nairn, J. R., and R. J. B. Fawcett. "The Excess Heat Factor: A Metric for Heatwave Intensity and Its Use

- in Classifying Heatwave Severity." *International Journal of Environmental Research and Public Health* 12, no. 1 (Dec 23 2014): 227-53.
- Nalau, J., J. Handmer, M. Dalesa, H. Foster, J. Edwards, H. Kauhiona, L. Yates, and S. Welegtabit. "The Practice of Integrating Adaptation and Disaster Risk Reduction in the South-West Pacific." *Climate and Development* 8, no. 4 (2016): 365-75.
- Narayan, E. J., and J. M. Hero. "Acute Thermal Stressor Increases Glucocorticoid Response but Minimizes Testosterone and Locomotor Performance in the Cane Toad (*Rhinella Marina*)." [In English]. *PLoS ONE* 9, no. 3 (2014): e92090.
- Nardini, A., M. A. Lo Gullo, P. Trifilò, and S. Salleo. "The Challenge of the Mediterranean Climate to Plant Hydraulics: Responses and Adaptations." *Environmental and Experimental Botany* 103 (2014): 68-79.
- Negrón-Juárez, R., D. B. Baker, J. Q. Chambers, G. C. Hurtt, and S. Goosem. "Multi-Scale Sensitivity of Landsat and Modis to Forest Disturbance Associated with Tropical Cyclones." [In English]. *Remote Sensing of Environment* 140 (2014): 679-89.
- Nelson, R., P. Kokic, S. Crimp, H. Meinke, and S. M. Howden. "The Vulnerability of Australian Rural Communities to Climate Variability and Change: Part I-Conceptualising and Measuring Vulnerability." [In English]. *Environmental Science and Policy* 13, no. 1 (2010): 8-17.
- Newall, P. R., L. N. Lloyd, P. A. Gell, and K. F. Walker. "Implications of Environmental Trajectories for Limits of Acceptable Change: A Case Study of the Riverland Ramsar Site, South Australia." *Marine and Freshwater Research* 67, no. 6 (2016): 738-47.
- Newton, G. "Australia's Environmental Climate Change Challenge: Overview with Reference to Water Resources." [In English]. *Australasian Journal of Environmental Management* 16, no. 3 (2009): 130-39.
- Newton, P. W. "Beyond Greenfield and Brownfield: The Challenge of Regenerating Australia's Greyfield Suburbs." *Built Environment* 36, no. 1 (2010): 81-104.
- Ngugi, M. R., and D. B. Botkin. "Validation of a Multispecies Forest Dynamics Model Using 50-Year Growth from Eucalyptus Forests in Eastern Australia." [In English]. *Ecological Modelling* 222, no. 17 (2011): 3261-70.
- Nguyen, H. D., S. S. Doo, N. A. Soars, and M. Byrne. "Noncalcifying Larvae in a Changing Ocean: Warming, Not Acidification/Hypercapnia, Is the Dominant Stressor on Development of the Sea Star *Meridiastra Calcar*." [In English]. *Global Change Biology* 18, no. 8 (2012): 2466-76.
- Nguyen-Huy, T., R. C. Deo, D. A. An-Vo, S. Mushtaq, and S. Khan. "Copula-Statistical Precipitation Forecasting Model in Australia's Agro-Ecological Zones." *Agricultural Water Management* 191 (2017): 153-72.
- Nicol, S., R. A. Fuller, T. Iwamura, and I. Chadès. "Adapting Environmental Management to Uncertain but Inevitable Change." *Proceedings of the Royal Society B: Biological Sciences* 282, no. 1808 (Jun 7 2015): 1-8.
- Nidumolu, U., S. Crimp, D. Gobbett, A. Laing, M. Howden, and S. Little. "Spatio-Temporal Modelling of Heat Stress and Climate Change Implications for the Murray Dairy Region, Australia." [In English]. *International Journal of Biometeorology* 58, no. 6 (Aug 2014): 1095-108.
- Nie, Z., and M. R. Norton. "Stress Tolerance and Persistence of Perennial Grasses: The Role of the Summer Dormancy Trait in Temperate Australia." [In English]. *Crop Science* 49, no. 6 (2009): 2405-11.
- Nielsen, D. L., and M. A. Brock. "Modified Water Regime and Salinity as a Consequence of Climate Change: Prospects for Wetlands of Southern Australia." [In English]. *Climatic Change* 95, no. 3-4 (2009): 523-33.

- Nikolakis, W., Q. Grafton, and A. Nygaard. "Indigenous Communities and Climate Change: A Recognition, Empowerment and Devolution (Red) Framework in the Murray-Darling Basin, Australia." *Journal of Water and Climate Change* 7, no. 1 (2016): 169-83.
- Nilsson, G. E., S. Östlund-Nilsson, and P. L. Munday. "Effects of Elevated Temperature on Coral Reef Fishes: Loss of Hypoxia Tolerance and Inability to Acclimate." [In English]. *Comparative Biochemistry and Physiology - A Molecular and Integrative Physiology* 156, no. 4 (2010): 389-93.
- Nitschke, C. R., S. Nichols, K. Allen, C. Dobbs, S. J. Livesley, P. J. Baker, and Y. Lynch. "The Influence of Climate and Drought on Urban Tree Growth in Southeast Australia and the Implications for Future Growth under Climate Change." *Landscape and Urban Planning* 167 (2017): 275-87.
- Norman, B. "Principles for an Intergovernmental Agreement for Coastal Planning and Climate Change in Australia." [In English]. *Habitat International* 33, no. 3 (2009): 293-99.
- Norman-López, A., S. Pascoe, O. Thébaud, I. van Putten, J. Innes, S. Jennings, A. Hobday, B. Green, and E. Plaganyi. "Price Integration in the Australian Rock Lobster Industry: Implications for Management and Climate Change Adaptation." [In English]. *Australian Journal of Agricultural and Resource Economics* 58, no. 1 (2014): 43-59.
- Norton, M. R., D. P. Malinowski, and F. Volaire. "Plant Drought Survival under Climate Change and Strategies to Improve Perennial Grasses. A Review." *Agronomy for Sustainable Development* 36, no. 2 (2016).
- Nowack, J., A. D. Rojas, G. Körtner, and F. Geiser. "Snoozing through the Storm: Torpor Use During a Natural Disaster." *Scientific Reports* 5 (Jun 15 2015): 11243.
- Nursey-Bray, M. "Inter-Disciplinarity as a Tool for Action on Climate Change: Applying Social Science Methodology to Climate Change Initiatives within Local Government, Australia." [In English]. *International Journal of Interdisciplinary Social Sciences* 2, no. 6 (2008): 93-106.
- . "Climate Change, Coastal Communities and Governance: Developing Solutions for Change in Australia." In *Integrated Coastal Zone Management*, 306-17: Wiley-Blackwell, 2009.
- . "Partnerships and Ports: Negotiating Climate Adaptive Governance for Sustainable Transport Regimes." *International Journal of Sustainable Transportation* 10, no. 2 (2016): 76-85.
- Nursey-Bray, M., D. Fergie, V. Arbon, L. I. Rigney, R. Palmer, J. Tibby, N. Harvey, L. Hackworth, and A. Stuart. "Indigenous Adaptation to Climate Change: The Arabana." In *Applied Studies in Climate Adaptation*, 316-25, 2014.
- Nursey-Bray, M., and N. Harvey. "Bridging the Science-Policy Divide in the Coastal Zone: Is There a Role for Learning Processes?". In *Global Challenges in Integrated Coastal Zone Management*, 218-28: John Wiley and Sons, 2013.
- Nutley, D. M., C. Coroneos, and J. Wheeler. "Potential Submerged Aboriginal Archaeological Sites in South West Arm, Port Hacking, New South Wales, Australia." In *Geological Society Special Publication*, 265-85, 2016.
- Nyberg, D., and C. Wright. "Justifying Business Responses to Climate Change: Discursive Strategies of Similarity and Difference." [In English]. *Environment and Planning A* 44, no. 8 (2012): 1819-35.
- O'Leary, G., B. Christy, A. Weeks, J. Nuttall, P. Riffkin, C. Beverly, and G. Fitzgerald. "Downscaling Global Climatic Predictions to the Regional Level: A Case Study of Regional Effects of Climate Change on Wheat Crop Production in Victoria, Australia." In *Crop Adaptation to Climate Change*, 12-26: Wiley-Blackwell, 2011.
- O'Toole, K., and B. Coffey. "Exploring the Knowledge Dynamics Associated with Coastal Adaptation



- Planning." [In English]. *Coastal Management* 41, no. 6 (2013): 561-75.
- O'Brien, L. V., H. L. Berry, C. Coleman, and I. C. Hanigan. "Drought as a Mental Health Exposure." [In English]. *Environmental Research* 131 (May 2014): 181-87.
- Odeh, I. O. A., D. K. Y. Tan, and T. Ancev. "Potential Suitability and Viability of Selected Biodiesel Crops in Australian Marginal Agricultural Lands under Current and Future Climates." [In English]. *Bioenergy Research* 4, no. 3 (2011): 165-79.
- Oettlé, A. C., F. P. Demeter, and E. N. L'Abbé. "Ancestral Variations in the Shape and Size of the Zygoma." *Anatomical Record* 300, no. 1 (Jan 2017): 196-208.
- Offord, C. A. "Pushed to the Limit: Consequences of Climate Change for the Araucariaceae: A Relictual Rain Forest Family." [In English]. *Annals of Botany* 108, no. 2 (2011): 347-57.
- Ofori, B. Y., A. J. Stow, J. B. Baumgartner, and L. J. Beaumont. "Influence of Adaptive Capacity on the Outcome of Climate Change Vulnerability Assessment." *Scientific Reports* 7, no. 1 (Oct 11 2017): 12979.
- . "Combining Dispersal, Landscape Connectivity and Habitat Suitability to Assess Climate-Induced Changes in the Distribution of Cunningham's Skink, *Egernia cunninghami*." *PLoS ONE* 12, no. 9 (2017): e0184193.
- Oliver, E. C. J., J. A. Benthuisen, N. L. Bindoff, A. J. Hobday, N. J. Holbrook, C. N. Mundy, and S. E. Perkins-Kirkpatrick. "The Unprecedented 2015/16 Tasman Sea Marine Heatwave." *Nature Communications* 8 (Jul 14 2017): 16101.
- Oliver, I., J. Dorrrough, H. Doherty, and N. R. Andrew. "Additive and Synergistic Effects of Land Cover, Land Use and Climate on Insect Biodiversity." *Landscape Ecology* 31, no. 10 (2016): 2415-31.
- Oliver, T. S. N., K. Rogers, C. J. Chafer, and C. D. Woodroffe. "Measuring, Mapping and Modelling: An Integrated Approach to the Management of Mangrove and Saltmarsh in the Minnamurra River Estuary, Southeast Australia." [In English]. *Wetlands Ecology and Management* 20, no. 4 (2012): 353-71.
- Oneill, S. J., and J. Handmer. "Responding to Bushfire Risk: The Need for Transformative Adaptation." [In English]. *Environmental Research Letters* 7, no. 1 (2012).
- Onstein, R. E., G. J. Jordan, H. Sauquet, P. H. Weston, Y. Bouchenak-Khelladi, R. J. Carpenter, and H. P. Linder. "Evolutionary Radiations of Proteaceae Are Triggered by the Interaction between Traits and Climates in Open Habitats." *Global Ecology and Biogeography* 25, no. 10 (2016): 1239-51.
- Ordóñez, A., J. W. Williams, and J. C. Svenning. "Mapping Climatic Mechanisms Likely to Favour the Emergence of Novel Communities." *Nature Climate Change* 6, no. 12 (2016): 1104-09.
- Osmond, P., L. Corkery, S. Wilkinson, S. Thompson, and S. Hawken. "The Arable City: Quantifying the Potential for Urban Agriculture in the 21st Century Metropolis." Paper presented at the SSS 2015 - 10th International Space Syntax Symposium, 2015.
- Osofsky, H. M., and J. Peel. "The Role of Litigation in Multilevel Climate Change Governance: Possibilities for a Lower Carbon Future?" [In English]. *Environmental and Planning Law Journal* 30, no. 4 (2013): 303-28.
- Overton, I. C., and T. M. Doody. "The River Murray-Darling Basin: Ecosystem Response to Drought and Climate Change." Chap. Chapter 12 In *Drought in Arid and Semi-Arid Regions: A Multi-Disciplinary and Cross-Country Perspective*, 217-34, 2013.
- Owen, C. L., D. C. Marshall, K. B. R. Hill, and C. Simon. "How the Aridification of Australia Structured the Biogeography and Influenced the Diversification of a Large Lineage of Australian Cicadas." *Systematic Biology* 66, no. 4 (Jul 1 2017): 569-89.
- Panayotou, K. "Coastal Management and Climate Change: An Australian Perspective." [In English].

- Journal of Coastal Research*, no. SPEC. ISSUE 56 (2009): 742-46.
- Panic, M., and J. D. Ford. "A Review of National-Level Adaptation Planning with Regards to the Risks Posed by Climate Change on Infectious Diseases in 14 Oecd Nations." *International Journal of Environmental Research and Public Health* 10, no. 12 (Dec 12 2013): 7083-109.
- Parker, A., M. Saad Saleem, and M. Lawson. "Sea-Level Trend Analysis for Coastal Management." [In English]. *Ocean and Coastal Management* 73 (2013): 63-81.
- Parsons, M. "Continuity and Change: Indigenous Australia and the Imperative of Adaptation." In *Applied Studies in Climate Adaptation*, 281-88, 2014.
- Parsons, M., K. Fisher, and J. Nalau. "Alternative Approaches to Co-Design: Insights from Indigenous/Academic Research Collaborations." *Current Opinion in Environmental Sustainability* 20 (2016): 99-105.
- Parsons, M., and M. C. Thoms. "Assessment of Rivers as Social-Ecological Systems: A Response to 'the Imperative Need for Nationally Coordinated Bioassessment of Rivers and Streams', by Susan J. Nichols Et Al." *Marine and Freshwater Research* 68, no. 12 (2017): 2179-83.
- Pathirana, S., and C. Akumu. "Bio-Climatic Modeling of the Potential Distribution of Coastal Wetlands in Response to Climate Change, North-Eastern Nsw Australia." Paper presented at the 34th International Symposium on Remote Sensing of Environment - The GEOSS Era: Towards Operational Environmental Monitoring, Sydney, NSW, 2011.
- Patrick, R., T. Capetola, M. Townsend, and S. Nuttman. "Health Promotion and Climate Change: Exploring the Core Competencies Required for Action." [In English]. *Health Promotion International* 27, no. 4 (2012): 475-85.
- Paydar, Z., and E. Qureshi. "Dealing with Risk and Uncertainty in Irrigation Water Management: An Australian Perspective." [In English]. *6th International Conference on Sustainable Water Resources Management, WRM 2011* 145 (2011): 3-13.
- Pearce, R., S. Dessai, and S. Barr. "Re-Framing Environmental Social Science Research for Sustainable Water Management in a Changing Climate." *Water Resources Management* 27, no. 4 (2013): 959-79.
- Pearman, G. I. "A Commentary on the Climate Change Issue." [In English]. *Australasian Journal of Environmental Management* 19, no. 3 (2012): 144-63.
- Peel, J., and M. Power. "Climate Change Law: Lessons from the Californian Experience." [In English]. *Environmental and Planning Law Journal* 27, no. 3 (2010): 169-88.
- Pembleton, K. G., B. R. Cullen, R. P. Rawnsley, M. T. Harrison, and T. Ramilan. "Modelling the Resilience of Forage Crop Production to Future Climate Change in the Dairy Regions of Southeastern Australia Using Apsim." *Journal of Agricultural Science* 154, no. 7 (2016): 1131-52.
- Peng, L., and M. G. Stewart. "Deterioration of Concrete Structures in Australia under a Changing Climate." Paper presented at the 22nd Australasian Conference on the Mechanics of Structures and Materials, ACMSM 2012, Sydney, NSW, 2013.
- . "Spatial Time-Dependent Reliability Analysis of Corrosion Damage to Rc Structures with Climate Change." [In English]. *Magazine of Concrete Research* 66, no. 22 (2014): 1154-69.
- Pepper, D. A., H. Lada, J. R. Thomson, K. S. Bakar, P. S. Lake, and R. Mac Nally. "Potential Future Scenarios for Australia's Native Biodiversity Given on-Going Increases in Human Population." *Science of the Total Environment* 576 (Jan 15 2017): 381-90.
- Pepper, M., M. K. Fujita, C. Moritz, and J. S. Keogh. "Palaeoclimate Change Drove Diversification among Isolated Mountain Refugia in the Australian Arid Zone." [In English]. *Molecular Ecology* 20, no. 7 (2011): 1529-45.

- Perdomo, A., and O. Hussain. "A Multisystem Climate Change Adaptation Approach for Water Sustainability in Regional Australia." [In English]. *International Journal of Global Warming* 3, no. 1-2 (2011): 39-54.
- Perkins, S. E., A. Moise, P. Whetton, and J. Katzfey. "Regional Changes of Climate Extremes over Australia - a Comparison of Regional Dynamical Downscaling and Global Climate Model Simulations." [In English]. *International Journal of Climatology* 34, no. 12 (2014): 3456-78.
- Perring, M. P., B. R. Cullen, I. R. Johnson, and M. J. Hovenden. "Modelled Effects of Rising Co2 Concentration and Climate Change on Native Perennial Grass and Sown Grass-Legume Pastures." [In English]. *Climate Research* 42, no. 1 (2010): 65-78.
- Pettit, C. J., A. B. M. Russel, A. Michael, J. P. Aurambout, S. Sharma, S. Williams, D. Hunter, *et al.* "Realising an Escience Platform to Support Climate Change Adaptation in Victoria." Paper presented at the 2010 6th IEEE International Conference on e-Science, eScience 2010, Brisbane, QLD, 2010.
- Pettit, N. E., R. J. Naiman, J. M. Fry, J. D. Roberts, P. G. Close, B. J. Pusey, G. S. Woodall, *et al.* "Environmental Change: Prospects for Conservation and Agriculture in a Southwest Australia Biodiversity Hotspot." *Ecology and Society* 20, no. 3 (2015).
- Pfäffle, M., N. Littwin, S. V. Muders, and T. N. Petney. "The Ecology of Tick-Borne Diseases." *International Journal for Parasitology* 43, no. 12-13 (Nov 2013): 1059-77.
- Pfautsch, S., M. Harbusch, A. Wesolowski, R. Smith, C. Macfarlane, M. G. Tjoelker, P. B. Reich, and M. A. Adams. "Climate Determines Vascular Traits in the Ecologically Diverse Genus Eucalyptus." *Ecology Letters* 19, no. 3 (Mar 2016): 240-48.
- Phelan, L. "Managing Climate Risk: Extreme Weather Events and the Future of Insurance in a Climate-Changed World." [In English]. *Australasian Journal of Environmental Management* 18, no. 4 (2011): 223-32.
- Phillips, B. L., M. M. Muñoz, A. Hatcher, S. L. Macdonald, J. Llewelyn, V. Lucy, and C. Moritz. "Heat Hardening in a Tropical Lizard: Geographic Variation Explained by the Predictability and Variance in Environmental Temperatures." *Functional Ecology* 30, no. 7 (2016): 1161-68.
- Pichancourt, J. B., J. Firn, I. Chadès, and T. G. Martin. "Growing Biodiverse Carbon-Rich Forests." [In English]. *Global Change Biology* 20, no. 2 (Feb 2014): 382-93.
- Pickering, J., J. Skovgaard, S. Kim, J. T. Roberts, D. Rossati, M. Stadelmann, and H. Reich. "Acting on Climate Finance Pledges: Inter-Agency Dynamics and Relationships with Aid in Contributor States." *World Development* 68, no. 1 (2015): 149-62.
- Pinceel, T., L. Brendonck, M. H. D. Larmuseau, M. P. M. Vanhove, B. V. Timms, and B. Vanschoenwinkel. "Environmental Change as a Driver of Diversification in Temporary Aquatic Habitats: Does the Genetic Structure of Extant Fairy Shrimp Populations Reflect Historic Aridification?" [In English]. *Freshwater Biology* 58, no. 8 (2013): 1556-72.
- Pinkard, E., M. Battaglia, J. Bruce, S. Matthews, A. N. Callister, S. Hetherington, I. Last, *et al.* "A History of Forestry Management Responses to Climatic Variability and Their Current Relevance for Developing Climate Change Adaptation Strategies." *Forestry* 88, no. 2 (2015): 155-71.
- Pittock, B. "Co-Benefits of Large-Scale Renewables in Remote Australia: Energy Futures and Climate Change." [In English]. *Rangeland Journal* 33, no. 4 (2011): 315-25.
- Pittock, J. "National Climate Change Policies and Sustainable Water Management: Conflicts and Synergies." [In English]. *Ecology and Society* 16, no. 2 (2011).
- Pittock, J., and D. Connell. "Australia Demonstrates the Planet's Future: Water and Climate in the Murray-Darling Basin." [In English]. *International Journal of Water Resources Development* 26, no. 4 (2010): 561-78.

- Pittock, J., and J. Hartmann. "Taking a Second Look: Climate Change, Periodic Relicensing and Improved Management of Dams." [In English]. *Marine and Freshwater Research* 62, no. 3 (2011): 312-20.
- Pittock, J., K. Hussey, and S. McGlennon. "Australian Climate, Energy and Water Policies: Conflicts and Synergies." [In English]. *Australian Geographer* 44, no. 1 (2013): 3-22.
- Pittock, J., N. Marshall, T. Capon, M. Parsons, A. I. Robertson, and C. Casaril. "A Review of Australian Institutions for Riparian Adaptation to Climate Change." [In English]. *Journal of Water and Climate Change* 5, no. 3 (2014): 315-27.
- Plagányi, E. E., J. D. Bell, R. H. Bustamante, J. M. Dambacher, D. M. Dennis, C. M. Dichmont, L. X. C. Dutra, *et al.* "Modelling Climate-Change Effects on Australian and Pacific Aquatic Ecosystems: A Review of Analytical Tools and Management Implications." [In English]. *Marine and Freshwater Research* 62, no. 9 (2011): 1132-47.
- Plagányi, É E., I. Van Putten, O. Thébaud, A. J. Hobday, J. Innes, L. Lim-Camacho, A. Norman-López, *et al.* "A Quantitative Metric to Identify Critical Elements within Seafood Supply Networks." [In English]. *PLoS ONE* 9, no. 3 (2014): e91833.
- Pope, K. O., and J. E. Terrell. "Environmental Setting of Human Migrations in the Circum-Pacific Region." *Journal of Biogeography* 35, no. 1 (2008): 1-21.
- Popova, E., A. Yool, V. Byfield, K. Cochrane, A. C. Coward, S. S. Salim, M. A. Gasalla, *et al.* "From Global to Regional and Back Again: Common Climate Stressors of Marine Ecosystems Relevant for Adaptation across Five Ocean Warming Hotspots." *Global Change Biology* 22, no. 6 (Jun 2016): 2038-53.
- Potgieter, A., H. Meinke, A. Doherty, V. O. Sadras, G. Hammer, S. Crimp, and D. Rodriguez. "Spatial Impact of Projected Changes in Rainfall and Temperature on Wheat Yields in Australia." [In English]. *Climatic Change* 117, no. 1-2 (2013): 163-79.
- Potts, T. "The Natural Advantage of Regions: Linking Sustainability, Innovation, and Regional Development in Australia." *Journal of Cleaner Production* 18, no. 8 (2010): 713-25.
- Power, S. B., A. Schiller, G. Cambers, D. Jones, and K. Hennessy. "The Pacific Climate Change Science Program." [In English]. *Bulletin of the American Meteorological Society* 92, no. 11 (2011): 1409-11.
- Pozio, E., and D. S. Zarlenga. "New Pieces of the Trichinella Puzzle." *International Journal for Parasitology* 43, no. 12-13 (Nov 2013): 983-97.
- Pratchett, M. S., L. K. Bay, P. C. Gehrke, J. D. Koehn, K. Osborne, R. L. Pressey, H. P. A. Sweatman, and D. Wachenfeld. "Contribution of Climate Change to Degradation and Loss of Critical Fish Habitats in Australian Marine and Freshwater Environments." [In English]. *Marine and Freshwater Research* 62, no. 9 (2011): 1062-81.
- Prato, T. "Conceptual Framework for Adaptive Management of Coupled Human and Natural Systems with Respect to Climate Change Uncertainty." *Australasian Journal of Environmental Management* 24, no. 1 (2017): 47-63.
- Prendergast-Miller, M. T., A. B. de Menezes, L. M. Macdonald, P. Toscas, A. Bissett, G. Baker, M. Farrell, *et al.* "Wildfire Impact: Natural Experiment Reveals Differential Short-Term Changes in Soil Microbial Communities." *Soil Biology and Biochemistry* 109 (2017): 1-13.
- Preston, B. L., R. M. Westaway, and E. J. Yuen. "Climate Adaptation Planning in Practice: An Evaluation of Adaptation Plans from Three Developed Nations." [In English]. *Mitigation and Adaptation Strategies for Global Change* 16, no. 4 (2011): 407-38.
- Price, G. J. "Plio-Pleistocene Climate and Faunal Change in Central Eastern Australia." [In English]. *Episodes* 35, no. 1 (2012): 160-65.

- Prichard, S. J., C. S. Stevens-Rumann, and P. F. Hessburg. "Tamm Review: Shifting Global Fire Regimes: Lessons from Reburns and Research Needs." *Forest Ecology and Management* 396 (2017): 217-33.
- Prideaux, B., B. McKercher, and K. E. McNamara. "Modelling a Tourism Response to Climate Change Using a Four Stage Problem Definition and Response Framework." [In English]. *Asia Pacific Journal of Tourism Research* 18, no. 1-2 (2013): 165-82.
- Prideaux, G. J., J. A. Long, L. K. Ayliffe, J. C. Hellstrom, B. Pillans, W. E. Boles, M. N. Hutchinson, *et al.* "An Arid-Adapted Middle Pleistocene Vertebrate Fauna from South-Central Australia." [In English]. *Nature* 445, no. 7126 (2007): 422-25.
- Prior, J., and S. Boydell. "Understanding Property Rights in Carbon: A Methodological Inquiry." Paper presented at the Construction, Building and Real Estate Research Conference of the Royal Institution of Chartered Surveyors, COBRA 2010, Paris, 2010.
- Prior, T., and C. Eriksen. "Wildfire Preparedness, Community Cohesion and Social-Ecological Systems." [In English]. *Global Environmental Change* 23, no. 6 (2013): 1575-86.
- Prober, S. M., M. J. Colloff, N. Abel, S. Crimp, M. D. Doherty, M. Dunlop, D. J. Eldridge, *et al.* "Informing Climate Adaptation Pathways in Multi-Use Woodland Landscapes Using the Values-Rules-Knowledge Framework." *Agriculture, Ecosystems and Environment* 241 (2017): 39-53.
- Prober, S. M., D. W. Hilbert, S. Ferrier, M. Dunlop, and D. Gobbett. "Combining Community-Level Spatial Modelling and Expert Knowledge to Inform Climate Adaptation in Temperate Grassy Eucalypt Woodlands and Related Grasslands." [In English]. *Biodiversity and Conservation* 21, no. 7 (2012): 1627-50.
- Prober, S. M., and F. P. Smith. "Enhancing Biodiversity Persistence in Intensively Used Agricultural Landscapes: A Synthesis of 30 Years of Research in the Western Australian Wheatbelt." [In English]. *Agriculture, Ecosystems and Environment* 132, no. 3-4 (2009): 173-91.
- Prober, S. M., K. R. Thiele, P. W. Rundel, C. J. Yates, S. L. Berry, M. Byrne, L. Christidis, *et al.* "Facilitating Adaptation of Biodiversity to Climate Change: A Conceptual Framework Applied to the World's Largest Mediterranean-Climate Woodland." [In English]. *Climatic Change* 110, no. 1-2 (2012): 227-48.
- Prowse, T. A. A., and B. W. Brook. "Climate Change, Variability and Conservation Impacts in Australia." [In English]. *Pacific Conservation Biology* 17, no. 3 (2011): 168-78.
- Przeslawski, R., S. Ahyong, M. Byrne, G. Wörheide, and P. Hutchings. "Beyond Corals and Fish: The Effects of Climate Change on Noncoral Benthic Invertebrates of Tropical Reefs." [In English]. *Global Change Biology* 14, no. 12 (2008): 2773-95.
- Qureshi, M. E., M. U. D. Ahmad, S. M. Whitten, and M. Kirby. "A Multi-Period Positive Mathematical Programming Approach for Assessing Economic Impact of Drought in the Murray-Darling Basin, Australia." [In English]. *Economic Modelling* 39 (2014): 293-304.
- Rabosky, D. L., S. C. Donnellan, A. L. Talaba, and I. J. Lovette. "Exceptional among-Lineage Variation in Diversification Rates During the Radiation of Australia's Most Diverse Vertebrate Clade." [In English]. *Proceedings of the Royal Society B: Biological Sciences* 274, no. 1628 (2007): 2915-23.
- Rambaldi, A. N., C. S. Fletcher, K. Collins, and R. R. J. McAllister. "Housing Shadow Prices in an Inundation-Prone Suburb." [In English]. *Urban Studies* 50, no. 9 (2013): 1889-905.
- Ramm, T. D., C. J. White, A. H. C. Chan, and C. S. Watson. "A Review of Methodologies Applied in Australian Practice to Evaluate Long-Term Coastal Adaptation Options." *Climate Risk Management* 17 (2017): 35-51.
- Ramm, T. D., C. J. White, and S. W. Franks. "Accounting for Uncertainty in Cost Benefit Analysis: A

- Generalised Framework for Natural Hazard Adaptation in the Coastal Zone." Paper presented at the The Art and Science of Water - 36th Hydrology and Water Resources Symposium, HWRS 2015, 2015.
- Rane, R. V., L. Rako, M. Kapun, S. F. Lee, and A. A. Hoffmann. "Genomic Evidence for Role of Inversion 3rp of *Drosophila Melanogaster* in Facilitating Climate Change Adaptation." *Molecular Ecology* 24, no. 10 (May 2015): 2423-32.
- Rashid, M. M., S. Beecham, and R. K. Chowdhury. "Statistical Downscaling of Cmp5 Outputs for Projecting Future Changes in Rainfall in the Onkaparinga Catchment." *Science of the Total Environment* 530-531 (Oct 15 2015): 171-82.
- . "Simulation of Extreme Rainfall and Projection of Future Changes Using the Glimclim Model." *Theoretical and Applied Climatology* 130, no. 1-2 (2017): 453-66.
- Raven, P. H., and D. K. Yeates. "Australian Biodiversity: Threats for the Present, Opportunities for the Future." [In English]. *Australian Journal of Entomology* 46, no. 3 (2007): 177-87.
- Rawal, D. S., S. Kasel, M. R. Keatley, C. Aponte, and C. R. Nitschke. "Environmental Effects on Growth Phenology of Co-Occurring Eucalyptus Species." [In English]. *International Journal of Biometeorology* 58, no. 4 (May 2014): 427-42.
- Raymond, C. M., A. M. Lechner, M. Lockwood, O. Carter, R. M. B. Harris, and L. Gilfedder. "Private Land Manager Capacity to Conserve Threatened Communities under Climate Change." *Journal of Environmental Management* 159 (Aug 15 2015): 235-44.
- Razzaghmanesh, M., S. Beecham, and T. Salemi. "The Role of Green Roofs in Mitigating Urban Heat Island Effects in the Metropolitan Area of Adelaide, South Australia." *Urban Forestry and Urban Greening* 15 (2016): 89-102.
- Reckless, H. J., M. Murray, and M. S. Crowther. "A Review of Climatic Change as a Determinant of the Viability of Koala Populations." *Wildlife Research* 44, no. 6-7 (2017): 458-70.
- Reeve, A., C. Hargroves, C. Desha, and P. Newman. "Informing Healthy Building Design with Biophilic Urbanism Design Principles: A Review and Synthesis of Current Knowledge and Research." Paper presented at the 10th International Conference on Healthy Buildings 2012, Brisbane, QLD, 2012.
- Remøy, H. T., and S. J. Wilkinson. "Office Building Conversion and Sustainable Adaptation: A Comparative Study." [In English]. *Property Management* 30, no. 3 (2012): 218-31.
- Ren, Z., Z. Chen, and X. Wang. "Climate Change Adaptation Pathways for Australian Residential Buildings." [In English]. *Building and Environment* 46, no. 11 (2011): 2398-412.
- Reser, J. P., G. L. Bradley, and M. C. Ellul. "Coping with Climate Change: Bringing Psychological Adaptation in from the Cold." In *Handbook of the Psychology of Coping: New Research*, 1-34: Nova Science Publishers, Inc., 2012.
- . "Public Risk Perceptions, Understandings and Responses to Climate Change." In *Applied Studies in Climate Adaptation*, 43-50, 2014.
- Reside, A. E., J. Vanderwal, S. T. Garnett, and A. S. Kutt. "Vulnerability of Australian Tropical Savanna Birds to Climate Change." *Austral Ecology* 41, no. 1 (2016): 106-16.
- Reside, A. E., J. VanDerWal, and A. S. Kutt. "Projected Changes in Distributions of Australian Tropical Savanna Birds under Climate Change Using Three Dispersal Scenarios." [In English]. *Ecology and Evolution* 2, no. 4 (2012): 705-18.
- Rich, J. L., S. L. Wright, and D. Loxton. "'Patience, Hormone Replacement Therapy and Rain!' Women, Ageing and Drought in Australia: Narratives from the Mid-Age Cohort of the Australian Longitudinal Study on Women's Health." [In English]. *Australian Journal of Rural Health* 20, no. 6 (2012): 324-28.

- Richards, R., M. Sanó, A. Roiko, R. W. Carter, M. Bussey, J. Matthews, and T. F. Smith. "Bayesian Belief Modeling of Climate Change Impacts for Informing Regional Adaptation Options." [In English]. *Environmental Modelling and Software* 44 (2013): 113-21.
- Richards, R. G., A. T. Davidson, J. O. Meynecke, K. Beattie, V. Hernaman, T. Lynam, and I. E. van Putten. "Effects and Mitigations of Ocean Acidification on Wild and Aquaculture Scallop and Prawn Fisheries in Queensland, Australia." *Fisheries Research* 161 (2015): 42-56.
- Richardson, K. M., A. A. Hoffmann, P. Johnson, S. R. Ritchie, and M. R. Kearney. "A Replicated Comparison of Breeding-Container Suitability for the Dengue Vector *Aedes Aegypti* in Tropical and Temperate Australia." [In English]. *Austral Ecology* 38, no. 2 (2013): 219-29.
- Richman, M. B., and L. M. Leslie. "Attribution and Prediction of Maximum Temperature Extremes in Se Australia." Paper presented at the Procedia Computer Science, 2014.
- Rickards, L., and S. M. Howden. "Transformational Adaptation: Agriculture and Climate Change." [In English]. *Crop and Pasture Science* 63, no. 3 (2012): 240-50.
- Rigby, C. W., A. Rosen, H. L. Berry, and C. R. Hart. "If the Land's Sick, We're Sick: The Impact of Prolonged Drought on the Social and Emotional Well-Being of Aboriginal Communities in Rural New South Wales." [In English]. *Australian Journal of Rural Health* 19, no. 5 (2011): 249-54.
- Rix, M. G., S. J. B. Cooper, K. Meusemann, S. Klopfstein, S. E. Harrison, M. S. Harvey, and A. D. Austin. "Post-Eocene Climate Change across Continental Australia and the Diversification of Australasian Spiny Trapdoor Spiders (Idiopidae: Arbanitinae)." *Molecular Phylogenetics and Evolution* 109 (Apr 2017): 302-20.
- Rochfort, S. J., V. Ezernieks, and A. L. Yen. "Nmr-Based Metabolomics Using Earthworms as Potential Indicators for Soil Health." [In English]. *Metabolomics* 5, no. 1 (2009): 95-107.
- Rodriguez, D., H. Cox, P. deVoil, and B. Power. "A Participatory Whole Farm Modelling Approach to Understand Impacts and Increase Preparedness to Climate Change in Australia." [In English]. *Agricultural Systems* 126 (2014): 50-61.
- Roe, J., and A. Georges. "Responses of Freshwater Turtles to Drought: The Past, Present and Implications for Future Climate Change in Australia." In *Meltdown: Climate Change, Natural Disasters and Other Catastrophes - Fears and Concerns of the Future*, 175-90: Nova Science Publishers, Inc., 2009.
- Rogers, K., P. I. Boon, S. Branigan, N. C. Duke, C. D. Field, J. A. Fitzsimons, H. Kirkman, J. R. Mackenzie, and N. Saintilan. "The State of Legislation and Policy Protecting Australia's Mangrove and Salt Marsh and Their Ecosystem Services." *Marine Policy* 72 (2016): 139-55.
- Rogers, M. J., A. Lawson, and K. Kelly. "Forage Options for Dairy Farms with Reduced Water Availability in the Southern Murray Darling Basin of Australia." *Sustainability (Switzerland)* 9, no. 12 (2017).
- Rogiers, S. Y., W. J. Hardie, and J. P. Smith. "Stomatal Density of Grapevine Leaves (*Vitis Vinifera* L.) Responds to Soil Temperature and Atmospheric Carbon Dioxide." [In English]. *Australian Journal of Grape and Wine Research* 17, no. 2 (2011): 147-52.
- Roiko, A., R. B. Mangoyana, S. McFallan, R. W. Carter, J. Oliver, and T. F. Smith. "Socio-Economic Trends and Climate Change Adaptation: The Case of South East Queensland." [In English]. *Australasian Journal of Environmental Management* 19, no. 1 (2012): 35-50.
- Ruddock, K., and D. Green. "What Legal Recourse Do Non-State Islands Have to Obtain Resources to Adapt to Climate Change?" [In English]. *Macquarie Journal of International and Comparative Environmental Law* 7, no. 2 (2011): 69-91.
- Runting, R. K., K. A. Wilson, and J. R. Rhodes. "Does More Mean Less? The Value of Information for Conservation Planning under Sea Level Rise." *Global Change Biology* 19, no. 2 (Feb 2013):

- 352-63.
- Ryan, J. G., and C. A. McAlpine. "Simulating the Feedback between Land Cover Configuration and Ecohydrological Functioning in Complex Adaptive Landscapes." Paper presented at the MODSIM05 - International Congress on Modelling and Simulation: Advances and Applications for Management and Decision Making, Proceedings, 2005.
- Ryan, P. C., M. G. Stewart, and N. Spencer. "Cost-Effective Design and Maintenance of Timber Power Distribution Poles in a Changing Climate." Paper presented at the 12th International Conference on Applications of Statistics and Probability in Civil Engineering, ICASP 2015, 2015.
- Sadras, V. O., R. Bubner, and M. A. Moran. "A Large-Scale, Open-Top System to Increase Temperature in Realistic Vineyard Conditions." [In English]. *Agricultural and Forest Meteorology* 154-155 (2012): X187-94.
- Sadras, V. O., M. A. Moran, and M. Bonada. "Effects of Elevated Temperature in Grapevine. I Berry Sensory Traits." [In English]. *Australian Journal of Grape and Wine Research* 19, no. 1 (2013): 95-106.
- Sadras, V. O., P. R. Petrie, and M. A. Moran. "Effects of Elevated Temperature in Grapevine. Ii Juice Ph, Titratable Acidity and Wine Sensory Attributes." [In English]. *Australian Journal of Grape and Wine Research* 19, no. 1 (2013): 107-15.
- Saft, M., A. W. Western, L. Zhang, M. C. Peel, and N. J. Potter. "The Influence of Multiyear Drought on the Annual Rainfall-Runoff Relationship: An Australian Perspective." *Water Resources Research* 51, no. 4 (2015): 2444-63.
- Sahin, O., E. Bertone, and M. Baker. "Evaluating Design Alternatives of Constructed Storm-Water Treatment Wetlands." Paper presented at the IEEE International Conference on Industrial Engineering and Engineering Management, 2016.
- Saintilan, N., K. Rogers, and T. J. Ralph. "Matching Research and Policy Tools to Scales of Climatechange Adaptation in the Murray-Darling, a Large Australian River Basin: A Review." [In English]. *Hydrobiologia* 708, no. 1 (2013): 97-109.
- Saintilan, N., N. C. Wilson, K. Rogers, A. Rajkaran, and K. W. Krauss. "Mangrove Expansion and Salt Marsh Decline at Mangrove Poleward Limits." [In English]. *Global Change Biology* 20, no. 1 (2014): 147-57.
- Saman, W., S. Pullen, and J. Boland. "How to Cope with Heat Waves in the Home." In *Applied Studies in Climate Adaptation*, 354-63, 2014.
- Sano, M., A. Golshani, K. D. Splinter, D. Strauss, W. Thurston, and R. Tomlinson. "A Detailed Assessment of Vulnerability to Climate Change in the Gold Coast, Australia." [In English]. *Journal of Coastal Research*, no. SPEC. ISSUE 64 (2011): 245-49.
- Saunders, N. J., and W. L. Peirson. "Climate Change Adaptation of Urban Water Management Systems in the Wet/Dry Tropics." [In English]. *Australian Journal of Water Resources* 17, no. 2 (2013): 180-92.
- Sayer, J., C. Margules, A. K. Boedhihartono, A. Dale, T. Sunderland, J. Supriatna, and R. Saryanthi. "Landscape Approaches; What Are the Pre-Conditions for Success?" [In English]. *Sustainability Science* 10, no. 2 (2014): 345-55.
- Scanlan, J. C., R. A. Cowley, L. I. Pahl, G. L. Whish, and N. D. MacLeod. "Potential Impacts of Projected Climate Change on Safe Carrying Capacities for Extensive Grazing Lands of Northern Australia." Paper presented at the 19th International Congress on Modelling and Simulation - Sustaining Our Future: Understanding and Living with Uncertainty, MODSIM2011, Perth, WA, 2011.
- Scheiter, S., S. I. Higgins, J. Beringer, and L. B. Hutley. "Climate Change and Long-Term Fire



- Management Impacts on Australian Savannas." *New Phytologist* 205, no. 3 (Feb 2015): 1211-26.
- Schiffer, M., S. Hangartner, and A. A. Hoffmann. "Assessing the Relative Importance of Environmental Effects, Carry-over Effects and Species Differences in Thermal Stress Resistance: A Comparison of Drosophilids across Field and Laboratory Generations." [In English]. *Journal of Experimental Biology* 216, no. 20 (2013): 3790-98.
- Schmidt, S., and G. H. Walter. "Young Clades in an Old Family: Major Evolutionary Transitions and Diversification of the Eucalypt-Feeding Pergid Sawflies in Australia (Insecta, Hymenoptera, Pergidae)." [In English]. *Molecular Phylogenetics and Evolution* 74, no. 1 (2014): 111-21.
- Schultz, L., C. Folke, H. Österblom, and P. Olsson. "Adaptive Governance, Ecosystem Management, and Natural Capital." *Proceedings of the National Academy of Sciences of the United States of America* 112, no. 24 (Jun 16 2015): 7369-74.
- Schumann, N., N. J. Gales, R. G. Harcourt, and J. P. Y. Arnould. "Impacts of Climate Change on Australian Marine Mammals." [In English]. *Australian Journal of Zoology* 61, no. 2 (2013): 146-59.
- Schut, A. G. T., G. W. Wardell-Johnson, C. J. Yates, G. Keppel, I. Baran, S. E. Franklin, S. D. Hopper, *et al.* "Rapid Characterisation of Vegetation Structure to Predict Refugia and Climate Change Impacts across a Global Biodiversity Hotspot." [In English]. *PLoS ONE* 9, no. 1 (2014): e82778.
- Schweinsberg, M., R. Tollrian, and K. P. Lampert. "Inter- and Intra-Colonial Genotypic Diversity in Hermatypic Hydrozoans of the Family Milleporidae." *Marine Ecology* 38, no. 1 (2017).
- Schymanski, S. J., M. L. Roderick, M. Sivapalan, L. B. Hutley, and J. Beringer. "A Test of the Optimality Approach to Modelling Canopy Properties and Co2 Uptake by Natural Vegetation." [In English]. *Plant, Cell and Environment* 30, no. 12 (2007): 1586-98.
- Sciulli, N. "Towards the Development of a Climate Change Risk Index for Local Government: Some Evidence from Coastal Councils in Australia." [In English]. *Corporate Ownership and Control* 10, no. 4 C,CONT2 (2013): 276-82.
- . "Organizational Barriers to Adapting Infrastructure Assets to Climate Change: Evidence from Coastal Councils in Australia." [In English]. *Public Money and Management* 33, no. 2 (2013): 153-60.
- Scott, J., and C. Weston. "The Pitfalls and Promises of Climate Adaptation Planning." [In English]. *Australasian Journal of Environmental Management* 18, no. 2 (2011): 73-87.
- Seo, S. N. "Managing Forests, Livestock, and Crops under Global Warming: A Micro-Econometric Analysis of Land Use Changes in Africa." [In English]. *Australian Journal of Agricultural and Resource Economics* 54, no. 2 (2010): 239-58.
- . "Estimating Tropical Cyclone Damages under Climate Change in the Southern Hemisphere Using Reported Damages." [In English]. *Environmental and Resource Economics* 58, no. 3 (2014): 473-90.
- Seo, S. N., and B. McCarl. "Managing Livestock Species under Climate Change in Australia." [In English]. *Animals* 1, no. 4 (2011): 343-65.
- Serrao-Neumann, S., F. Crick, B. Harman, M. Sano, O. Sahin, R. van Staden, G. Schuch, S. Baum, and D. Low Choy. "Improving Cross-Sectoral Climate Change Adaptation for Coastal Settlements: Insights from South East Queensland, Australia." [In English]. *Regional Environmental Change* 14, no. 2 (2014): 489-500.
- Serrao-Neumann, S., G. M. Di Giulio, L. C. Ferreira, and D. L. Choy. "Advancing Climate Change Adaptation and Climate Risk Understanding through Intervention Research: Case Studies from Brazil and Australia." In *Climate Adaptation Governance in Cities and Regions: Theoretical Fundamentals and Practical Evidence*, 113-29, 2016.

- Serrao-Neumann, S., G. Schuch, B. Harman, F. Crick, M. Sano, O. Sahin, R. van Staden, S. Baum, and D. Low Choy. "One Human Settlement: A Transdisciplinary Approach to Climate Change Adaptation Research." *Futures* 65 (2015): 97-109.
- Sevoyan, A., and G. Hugo. "Vulnerability to Climate Change among Disadvantaged Groups: The Role of Social Exclusion." In *Applied Studies in Climate Adaptation*, 258-65, 2014.
- Shand, T. D., R. J. Cox, M. A. Mole, J. T. Carley, and W. L. Peirson. "Coastal Storm Data Analysis: Provision of Extreme Wave Data for Adaptation Planning." Paper presented at the 20th Australasian Coastal and Ocean Engineering Conference 2011, COASTS 2011 and the 13th Australasian Port and Harbour Conference 2011, PORTS 2011, Perth, WA, 2011.
- Shapcott, A., I. Hutton, W. J. Baker, and T. D. Auld. "Conservation Genetics and Ecology of an Endemic Montane Palm on Lord Howe Island and Its Potential for Resilience." [In English]. *Conservation Genetics* 13, no. 1 (2012): 257-70.
- Sharma, S., D. Van Gent, M. Burke, and L. Stelfox. "The Australian South West Hub Project: Developing a Storage Project in Unconventional Geology." Paper presented at the Energy Procedia, 2017.
- Shearer, B. L., C. E. Crane, R. G. Fairman, and C. P. Dunne. "Ecosystem Dynamics Altered by Pathogen-Mediated Changes Following Invasion of Banksia Woodland and Eucalyptusmarginata Forest Biomes of South-Western Australia by Phytophthoracinnamomi." [In English]. *Australasian Plant Pathology* 38, no. 4 (2009): 417-36.
- Shearer, H., J. Dodson, E. Coiacetto, and P. Taygfeld. "Capacities of Private Developers in Urban Climate Change Adaptation." In *Applied Studies in Climate Adaptation*, 422-28, 2014.
- Shen, L., and C. Langston. "Adaptive Reuse Potential: An Examination of Differences between Urban and Non-Urban Projects." [In English]. *Facilities* 28, no. 1 (2010): 6-16.
- Sherman, C. D. H., A. M. Stanley, M. J. Keough, M. G. Gardner, and P. I. Macreadie. "Development of Twenty-Three Novel Microsatellite Markers for the Seagrass, *Zostera Muelleri* from Australia." [In English]. *Conservation Genetics Resources* 4, no. 3 (2012): 689-93.
- Sherval, M., and L. E. Askew. "Experiencing 'Drought and More': Local Responses from Rural Victoria, Australia." [In English]. *Population and Environment* 33, no. 4 (2012): 347-64.
- Shoo, L. P., J. O'Mara, K. Perhans, J. R. Rhodes, R. K. Runting, S. Schmidt, L. W. Traill, *et al.* "Moving Beyond the Conceptual: Specificity in Regional Climate Change Adaptation Actions for Biodiversity in South East Queensland, Australia." [In English]. *Regional Environmental Change* 14, no. 2 (2014): 435-47.
- Short, M. D., W. L. Peirson, G. M. Peters, and R. J. Cox. "Managing Adaptation of Urban Water Systems in a Changing Climate." [In English]. *Water Resources Management* 26, no. 7 (2012): 1953-81.
- Short, M. D., E. Rocheta, G. M. Peters, M. Schulz, W. L. Peirson, R. M. Stuetz, and R. J. Cox. "Challenges in Adapting Australian Water Resources and Infrastructure to Climate Change." [In English]. *Water* 37, no. 7 (2010): 42-48.
- Siddique, K. H. M., W. Erskine, K. Hobson, E. J. Knights, A. Leonforte, T. N. Khan, J. G. Paull, R. Redden, and M. Materne. "Cool-Season Grain Legume Improvement in Australia - Use of Genetic Resources." [In English]. *Crop and Pasture Science* 64, no. 4 (2013): 347-60.
- Siew, R. Y. J. "Australian Construction Response to Sustainability 'Megaforces'." *Proceedings of the Institution of Civil Engineers: Engineering Sustainability* 168, no. 6 (2015): 230-44.
- Silva, D. P., S. V. C. Groom, C. R. B. da Silva, M. I. Stevens, and M. P. Schwarz. "Potential Pollination Maintenance by an Exotic Allodapine Bee under Climate Change Scenarios in the Indo-Pacific Region." *Journal of Applied Entomology* 141, no. 1-2 (2017): 122-32.

- Sim, L. L., J. A. Davis, K. Strehlow, M. McGuire, K. M. Trayler, S. Wild, P. J. Papas, and J. O'Connor. "The Influence of Changing Hydroregime on the Invertebrate Communities of Temporary Seasonal Wetlands." [In English]. *Freshwater Science* 32, no. 1 (2013): 327-42.
- Sinclair, M. "The Impacts of Climate Change." [In English]. *Hydro International* 13, no. 5 (2009).
- Singels, A., M. Jones, F. Marin, A. Ruane, and P. Thorburn. "Predicting Climate Change Impacts on Sugarcane Production at Sites in Australia, Brazil and South Africa Using the Canegro Model." [In English]. *Sugar Tech* 16, no. 4 (2013): 347-55.
- Singh, S., S. Davey, and M. Cole. "Implications of Climate Change for Forests, Vegetation and Carbon in Australia." [In English]. *New Zealand Journal of Forestry Science* 40 (2010): 141-52.
- Singh-Peterson, L., S. Serrao-Neumann, F. Crick, and I. Sporne. "Planning for Climate Change across Borders: Insights from the Gold Coast (Qld) - Tweed (Nsw) Region." [In English]. *Australian Planner* 50, no. 2 (2013): 148-56.
- Smith, J. E. "Effects of Environmental Variation on the Composition and Dynamics of an Arid-Adapted Australian Bird Community." *Pacific Conservation Biology* 21, no. 1 (2015): 74-86.
- Smith, P., and J. Smith. "Influence of Fire Regime and Other Habitat Factors on a Eucalypt Forest Bird Community in South-Eastern Australia in the 1980s." *Australian Journal of Zoology* 64, no. 5 (2016): 312-26.
- Smith, S., L. Bernatchez, and L. B. Beheregaray. "Rna-Seq Analysis Reveals Extensive Transcriptional Plasticity to Temperature Stress in a Freshwater Fish Species." [In English]. *BMC Genomics* 14, no. 1 (2013).
- Smith, T. F., C. Brooke, B. Preston, R. Gorrdard, D. Abbs, K. McInnes, G. Withycombe, and C. Morrison. "Managing for Climate Variability in the Sydney Region." [In English]. *Journal of Coastal Research*, no. SPEC. ISSUE 50 (2007): 109-13.
- Snoyman, S., J. Munich, and C. Brown. "Nursing Females Are More Prone to Heat Stress: Demography Matters When Managing Flying-Foxes for Climate Change." [In English]. *Applied Animal Behaviour Science* 142, no. 1-2 (2012): 90-97.
- Souter, N. J., and C. R. Williams. "The Climate Change Sa Symposium 2013: A Synthesis." *Transactions of the Royal Society of South Australia* 139, no. 1 (2015): 3-8.
- Sparrow, L., P. Momigliano, G. R. Russ, and K. Heimann. "Effects of Temperature, Salinity and Composition of the Dinoflagellate Assemblage on the Growth of Gambierdiscus Carpenteri Isolated from the Great Barrier Reef." *Harmful Algae* 65 (May 2017): 52-60.
- Spickett, J. T., H. L. Brown, and K. Rumchev. "Climate Change and Air Quality: The Potential Impact on Health." [In English]. *Asia-Pacific Journal of Public Health* 23, no. 2 SUPPL. (2011): 37S-45S.
- Stanley, J. "Adaptation in Small Coastal Towns in Australia." In *Climate Adaptation Governance in Cities and Regions: Theoretical Fundamentals and Practical Evidence*, 371-87, 2016.
- Steane, D. A., E. H. McLean, B. M. Potts, S. M. Prober, W. D. Stock, V. M. Stylianou, R. E. Vaillancourt, and M. Byrne. "Evidence for Adaptation and Acclimation in a Widespread Eucalypt of Semi-Arid Australia." *Biological Journal of the Linnean Society* 121, no. 3 (2017): 484-500.
- Steele, W., I. Sporne, P. Dale, S. Shearer, L. Singh-Peterson, S. Serrao-Neumann, F. Crick, D. L. Choy, and L. Eslami-Andargoli. "Learning from Cross-Border Arrangements to Support Climate Change Adaptation in Australia." [In English]. *Journal of Environmental Planning and Management* 57, no. 5 (2014): 682-703.
- Steffen, W., J. Sims, J. Walcott, and G. Laughlin. "Australian Agriculture: Coping with Dangerous Climate Change." [In English]. *Regional Environmental Change* 11, no. SUPPL. 1 (2011): 205-

14.

- Steiner, A., and J. Atterton. "Exploring the Contribution of Rural Enterprises to Local Resilience." *Journal of Rural Studies* 40 (2015): 30-45.
- Stella, J. C., P. M. Rodríguez-González, S. Dufour, and J. Bendix. "Riparian Vegetation Research in Mediterranean-Climate Regions: Common Patterns, Ecological Processes, and Considerations for Management." *Hydrobiologia* 719, no. 1 (2013): 291-315.
- Stephens, S. L., N. Burrows, A. Buyantuyev, R. W. Gray, R. E. Keane, R. Kubian, S. Liu, *et al.* "Temperate and Boreal Forest Mega-Fires: Characteristics and Challenges." [In English]. *Frontiers in Ecology and the Environment* 12, no. 2 (2014): 115-22.
- Stewart, M. G., X. Wang, and M. N. Nguyen. "Climate Change Adaptation for Corrosion Control of Concrete Infrastructure." [In English]. *Structural Safety* 35 (2012): 29-39.
- Stewart, M. G., X. Wang, and G. R. Willgoose. "Risk Assessment of Climate Adaptation Strategies for Australian Housing Subject to Extreme Wind Events." Paper presented at the 11th International Conference on Structural Safety and Reliability, ICOSSAR 2013, New York, NY, 2013.
- Stock, C. A., J. G. John, R. R. Rykaczewski, R. G. Asch, W. W. L. Cheung, J. P. Dunne, K. D. Friedland, *et al.* "Reconciling Fisheries Catch and Ocean Productivity." *Proceedings of the National Academy of Sciences of the United States of America* 114, no. 8 (Feb 21 2017): E1441-E49.
- Stocker, L., D. Kennedy, S. Metcalf, J. M. Dambacher, G. Middle, and D. Wood. "Modelling Coastal Planning in Southwest Western Australia: Complexity, Collaboration and Climate Adaptation." Paper presented at the 19th International Congress on Modelling and Simulation - Sustaining Our Future: Understanding and Living with Uncertainty, MODSIM2011, Perth, WA, 2011.
- Stocker-Wörgötter, E., and J. A. Elix. "Morphogenetic Strategies and Induction of Secondary Metabolite Biosynthesis in Cultured Lichen-Forming Ascomycota, as Exemplified by *Cladia Retipora* (Labill.) Nyl. And *Dactylina Arctica* (Richards) Nyl." [In English]. *Symbiosis* 41, no. 1 (2006): 9-20.
- Stokeld, D., A. J. Hamer, R. Van Der Ree, V. Pettigrove, and G. Gillespie. "Factors Influencing Occurrence of a Freshwater Turtle in an Urban Landscape: A Resilient Species?" [In English]. *Wildlife Research* 41, no. 2 (2014): 163-71.
- Stork, N. E., S. M. Turton, R. Hill, and M. B. Lane. "Revisiting Crisis, Change and Institutions in the Tropical Forests: The Multifunctional Transition in Australia's Wet Tropics." [In English]. *Journal of Rural Studies* 36 (2014): 99-107.
- Strand, L. B., S. Tong, R. Aird, and D. McRae. "Vulnerability of Eco-Environmental Health to Climate Change: The Views of Government Stakeholders and Other Specialists in Queensland, Australia." [In English]. *BMC Public Health* 10 (2010).
- Strazdins, L., S. Friel, A. McMichael, S. W. Butler, and E. Hanna. "Climate Change and Child Health in Australia: Likely Futures, New Inequities?". In *New Zealand and Australia in Focus: Economics, the Environment and Issues in Health Care*, 119-28: Nova Science Publishers, Inc., 2012.
- Strengers, Y. "Comfort Expectations: The Impact of Demand-Management Strategies in Australia." [In English]. *Building Research and Information* 36, no. 4 (2008): 381-91.
- Strengers, Y., and C. Maller. "Materialising Energy and Water Resources in Everyday Practices: Insights for Securing Supply Systems." [In English]. *Global Environmental Change* 22, no. 3 (2012): 754-63.
- Struggles, J. "Climate Disasters and Cities: The Role of Local Government in Increasing Urban Resilience." *Asia Pacific Journal of Environmental Law* 18 (2015): 91-118.

- Studer, A., and R. Poulin. "Analysis of Trait Mean and Variability Versus Temperature in Trematode Cercariae: Is There Scope for Adaptation to Global Warming?". *International Journal for Parasitology* 44, no. 6 (May 2014): 403-13.
- Summers, D. M., B. A. Bryan, N. D. Crossman, and W. S. Meyer. "Species Vulnerability to Climate Change: Impacts on Spatial Conservation Priorities and Species Representation." [In English]. *Global Change Biology* 18, no. 7 (2012): 2335-48.
- Suriyagoda, L. D. B., M. H. Ryan, D. Real, H. Lambers, and M. Renton. "An Integrated Approach to Model the Establishment, Water Use and Growth of New Perennial Pasture Species." Paper presented at the 18th World IMACS Congress and International Congress on Modelling and Simulation: Interfacing Modelling and Simulation with Mathematical and Computational Sciences, MODSIM09, Cairns, QLD, 2009.
- Suriyagoda, L. D. B., M. H. Ryan, M. Renton, and H. Lambers. "Multiple Adaptive Responses of Australian Native Perennial Legumes with Pasture Potential to Grow in Phosphorus- and Moisture-Limited Environments." [In English]. *Annals of Botany* 105, no. 5 (2010): 755-67.
- . "Adaptive Shoot and Root Responses Collectively Enhance Growth at Optimum Temperature and Limited Phosphorus Supply of Three Herbaceous Legume Species." [In English]. *Annals of Botany* 110, no. 5 (2012): 959-68.
- Sutherst, R. W., F. Constable, K. J. Finlay, R. Harrington, J. Luck, and M. P. Zalucki. "Adapting to Crop Pest and Pathogen Risks under a Changing Climate." [In English]. *Wiley Interdisciplinary Reviews: Climate Change* 2, no. 2 (2011): 220-37.
- Switkowski, Z. E. "Nuclear Options: Is the Climate Right for Nuclear Power?" [In English]. *AusIMM Bulletin*, no. 1 (2009): 60-61.
- Symes, P. "Guiding Landscape Transition for Climatic Change: Planning in the Royal Botanic Gardens Victoria, Australia," Conference Paper, *Acta Horticulturae* 1189, (2017): 137-42. doi:10.17660/ActaHortic.2017.1189.27.
- Takahashi, M., M. I. McCormick, P. L. Munday, and G. P. Jones. "Influence of Seasonal and Latitudinal Temperature Variation on Early Life-History Traits of a Coral Reef Fish." [In English]. *Marine and Freshwater Research* 63, no. 10 (2012): 856-64.
- Tan, K. S., and B. G. Rhodes. "Drought Severity Estimation under a Changing Climate." [In English]. *Australian Journal of Water Resources* 17, no. 2 (2013): 143-51.
- Tangney, P., and M. Howes. "The Politics of Evidence-Based Policy: A Comparative Analysis of Climate Adaptation in Australia and the UK." *Environment and Planning C: Government and Policy* 34, no. 6 (2016): 1115-34.
- Tanner-McAllister, S. L., J. R. Rhodes, and M. Hockings. "Community and Park Manager's Perceptions of Protected Area Management: A Southeast Queensland Study." [In English]. *Australasian Journal of Environmental Management* 21, no. 3 (2014): 320-36.
- Taylor, B., T. Wallington, S. Heyenga, and B. Harman. "Urban Growth and Climate Adaptation in Australia: Divergent Discourses and Implications for Policy-Making." [In English]. *Urban Studies* 51, no. 1 (2014): 3-21.
- Taylor, B. M., B. P. Harman, S. Heyenga, and R. R. J. McAllister. "Property Developers and Urban Adaptation: Conceptual and Empirical Perspectives on Governance." [In English]. *Urban Policy and Research* 30, no. 1 (2012): 5-24.
- Taylor, B. M., B. P. Harman, and M. Inman. "Scaling-up, Scaling-Down, and Scaling-Out: Local Planning Strategies for Sea-Level Rise in New South Wales, Australia." [In English]. *Geographical Research* 51, no. 3 (2013): 292-303.
- Taylor, M. A. P., and M. Philp. "Adapting to Climate Change - Implications for Transport Infrastructure,

- Transport Systems and Travel Behaviour." [In English]. *Road and Transport Research* 19, no. 4 (2010): 66-79.
- Taylor, M. A. P., and M. L. Philp. "Investigating the Impact of Maintenance Regimes on the Design Life of Road Pavements in a Changing Climate and the Implications for Transport Policy." *Transport Policy* 41 (2015): 117-35.
- Team, V., and L. Manderson. "Social and Public Health Effects of Climate Change in the '40 South'." [In English]. *Wiley Interdisciplinary Reviews: Climate Change* 2, no. 6 (2011): 902-18.
- Temby, O., J. Sandall, R. Cooksey, and G. M. Hickey. "How Do Civil Servants View the Importance of Collaboration and Scientific Knowledge for Climate Change Adaptation?." *Australasian Journal of Environmental Management* 23, no. 1 (2016): 5-20.
- Thom, B., and F. McKenzie. "The Population Policy Debate from a Natural Resource Perspective: Reflections from the Wentworth Group." [In English]. *Geographical Research* 49, no. 3 (2011): 348-61.
- Thomas, L., W. J. Kennington, R. D. Evans, G. A. Kendrick, and M. Stat. "Restricted Gene Flow and Local Adaptation Highlight the Vulnerability of High-Latitude Reefs to Rapid Environmental Change." *Global Change Biology* 23, no. 6 (Jun 2017): 2197-205.
- Thomas, L. E. "Evaluating Design Strategies, Performance and Occupant Satisfaction: A Low Carbon Office Refurbishment." [In English]. *Building Research and Information* 38, no. 6 (2010): 610-24.
- Thompson, J. A., and B. G. Lees. "Applying Object-Based Segmentation in the Temporal Domain to Characterise Snow Seasonality." [In English]. *ISPRS Journal of Photogrammetry and Remote Sensing* 97 (2014): 98-110.
- Thompson, R. C. A. "Parasite Zoonoses and Wildlife: One Health, Spillover and Human Activity." [In English]. *International Journal for Parasitology* 43, no. 12-13 (2013): 1079-88.
- Thomson, G., M. McCaskill, I. Goodwin, G. Kearney, and S. Lolicato. "Potential Impacts of Rising Global Temperatures on Australia's Pome Fruit Industry and Adaptation Strategies." [In English]. *New Zealand Journal of Crop and Horticultural Science* 42, no. 1 (2014): 21-30.
- Thorne, O. M., and R. A. Fenner. "Modelling the Impacts of Climate Change on a Water Treatment Plant in South Australia," Article, *Water Science and Technology: Water Supply* 8, (2008): 305-12. doi:10.2166/ws.2008.075.
- . "Risk-Based Climate-Change Impact Assessment for the Water Industry," Article, *Water Science and Technology* 59, (2009): 443-51. doi:10.2166/wst.2009.877.
- Thuiller, W., T. Münkemüller, S. Lavergne, D. Mouillot, N. Mouquet, K. Schifffers, and D. Gravel. "A Road Map for Integrating Eco-Evolutionary Processes into Biodiversity Models." [In English]. *Ecology Letters* 16, no. SUPPL.1 (2013): 94-105.
- Timbal, B., R. Koukoku, and G. A. Mills. "Changes in the Risk of Cool-Season Tornadoes over Southern Australia Due to Model Projections of Anthropogenic Warming." [In English]. *Journal of Climate* 23, no. 9 (2010): 2440-49.
- Timbal, B., Y. Wang, and A. Evans. "Downscaling Climate Change Information: An Essential Ingredient to Incorporate Uncertainties into Adaptation Policies." Paper presented at the 19th International Congress on Modelling and Simulation - Sustaining Our Future: Understanding and Living with Uncertainty, MODSIM2011, Perth, WA, 2011.
- Timmermann, A., and T. Friedrich. "Late Pleistocene Climate Drivers of Early Human Migration." *Nature* 538, no. 7623 (Oct 6 2016): 92-95.
- Tong, S., X. Y. Wang, and A. G. Barnett. "Assessment of Heat-Related Health Impacts in Brisbane, Australia: Comparison of Different Heatwave Definitions." [In English]. *PLoS ONE* 5, no. 8

- (2010).
- Torabi, N., B. Cooke, and S. A. Bekessy. "The Role of Social Networks and Trusted Peers in Promoting Biodiverse Carbon Plantings." *Australian Geographer* 47, no. 2 (2016): 139-56.
- Toussaint, E. F. A., F. L. Condamine, O. Hawlitschek, C. H. Watts, N. Porch, L. Hendrich, and M. Balke. "Unveiling the Diversification Dynamics of Australasian Predaceous Diving Beetles in the Cenozoic." *Systematic Biology* 64, no. 1 (Jan 2015): 3-24.
- Traill, L. W., C. J. A. Bradshaw, S. Delean, and B. W. Brook. "Wetland Conservation and Sustainable Use under Global Change: A Tropical Australian Case Study Using Magpie Geese." [In English]. *Ecography* 33, no. 5 (2010): 818-25.
- Traill, L. W., K. Perhans, C. E. Lovelock, A. Prohaska, S. McFallan, J. R. Rhodes, and K. A. Wilson. "Managing for Change: Wetland Transitions under Sea-Level Rise and Outcomes for Threatened Species." [In English]. *Diversity and Distributions* 17, no. 6 (2011): 1225-33.
- Tran, D. B., P. Dargusch, P. Moss, and T. V. Hoang. "An Assessment of Potential Responses of Melaleuca Genus to Global Climate Change." [In English]. *Mitigation and Adaptation Strategies for Global Change* 18, no. 6 (2013): 851-67.
- Tran, T., J. K. Weir, L. M. Strelein, and C. Stacey. "Indigenous Governance and Climate Change Adaptation: Two Native Title Case Studies from Australia." In *Applied Studies in Climate Adaptation*, 307-15, 2014.
- Trethowan, R. M. "Delivering Drought Tolerance to Those Who Need It: From Genetic Resource to Cultivar." [In English]. *Crop and Pasture Science* 65, no. 7 (2014): 645-54.
- Turner, G. M., R. Hoffman, B. C. McInnis, F. Polody, and B. Foran. "A Tool for Strategic Biophysical Assessment of a National Economy - the Australian Stocks and Flows Framework." [In English]. *Environmental Modelling and Software* 26, no. 9 (2011): 1134-49.
- Turner, N. C., N. Molyneux, S. Yang, Y. C. Xiong, and K. H. M. Siddique. "Climate Change in South-West Australia and North-West China: Challenges and Opportunities for Crop Production." [In English]. *Crop and Pasture Science* 62, no. 6 (2011): 445-56.
- Tweed, S., M. Grace, M. Leblanc, I. Cartwright, and D. Smithyman. "The Individual Response of Saline Lakes to a Severe Drought." [In English]. *Science of the Total Environment* 409, no. 19 (2011): 3919-33.
- Twomey, C., and A. Kiem. "Spatial Analysis of Australian Seasonal Rainfall Anomalies and Their Relation to East Coast Lows on the Eastern-Seaboard." Paper presented at the The Art and Science of Water - 36th Hydrology and Water Resources Symposium, HWRS 2015, 2015.
- Uloth, M. B., M. P. You, G. Cawthray, and M. J. Barbetti. "Temperature Adaptation in Isolates of *Sclerotinia sclerotiorum* Affects Their Ability to Infect *Brassica carinata*." *Plant Pathology* 64, no. 5 (2015): 1140-48.
- Umina, P. A., A. R. Weeks, M. R. Kearney, S. W. McKechnie, and A. A. Hoffmann. "Evolution: A Rapid Shift in a Classic Clinal Pattern in *Drosophila* Reflecting Climate Change." [In English]. *Science* 308, no. 5722 (2005): 691-93.
- Urban, M. C., B. L. Phillips, D. K. Skelly, and R. Shine. "The Cane Toad's (*Chaunus* [*Bufo*] *marinus*) Increasing Ability to Invade Australia Is Revealed by a Dynamically Updated Range Model." [In English]. *Proceedings of the Royal Society B: Biological Sciences* 274, no. 1616 (2007): 1413-19.
- van de Pol, M., H. L. Osmond, and A. Cockburn. "Fluctuations in Population Composition Dampen the Impact of Phenotypic Plasticity on Trait Dynamics in Superb Fairy-Wrens." [In English]. *Journal of Animal Ecology* 81, no. 2 (2012): 411-22.
- Van Der Heijden, J. "Voluntary Programmes for Building Retrofits: Opportunities, Performance and

- Challenges." *Building Research and Information* 43, no. 2 (2015): 170-84.
- Van Dijk, A. I. J. M., H. E. Beck, R. S. Crosbie, R. A. M. De Jeu, Y. Y. Liu, G. M. Podger, B. Timbal, and N. R. Viney. "The Millennium Drought in Southeast Australia (2001-2009): Natural and Human Causes and Implications for Water Resources, Ecosystems, Economy, and Society." [In English]. *Water Resources Research* 49, no. 2 (2013): 1040-57.
- van Heerwaarden, B., R. F. H. Lee, J. Overgaard, and C. M. Sgrò. "No Patterns in Thermal Plasticity Along a Latitudinal Gradient in *Drosophila Simulans* from Eastern Australia." *Journal of Evolutionary Biology* 27, no. 11 (Nov 2014): 2541-53.
- van Heerwaarden, B., M. Malmberg, and C. M. Sgrò. "Increases in the Evolutionary Potential of Upper Thermal Limits under Warmer Temperatures in Two Rainforest *Drosophila* Species." *Evolution* 70, no. 2 (Feb 2016): 456-64.
- van Oosterzee, P., A. Dale, and N. D. Preece. "Integrating Agriculture and Climate Change Mitigation at Landscape Scale: Implications from an Australian Case Study." [In English]. *Global Environmental Change* 29 (2014): 306-17.
- van Putten, I., S. Metcalf, S. Frusher, N. Marshall, and M. Tull. "Fishing for the Impacts of Climate Change in the Marine Sector: A Case Study." [In English]. *International Journal of Climate Change Strategies and Management* 6, no. 4 (2014): 421-41.
- van Putten, I. E., A. K. Farmery, B. S. Green, A. J. Hobday, L. Lim-Camacho, A. Norman-López, and R. W. Parker. "The Environmental Impact of Two Australian Rock Lobster Fishery Supply Chains under a Changing Climate." *Journal of Industrial Ecology* 20, no. 6 (2016): 1384-98.
- Van Putten, I. E., S. Frusher, E. A. Fulton, A. J. Hobday, S. M. Jennings, S. Metcalf, and G. T. Pecl. "Empirical Evidence for Different Cognitive Effects in Explaining the Attribution of Marine Range Shifts to Climate Change." *ICES Journal of Marine Science* 73, no. 5 (2016): 1306-18.
- van Riper, C. J., G. T. Kyle, S. G. Sutton, J. I. Yoon, and R. C. Tobin. "Australian Residents' Attitudes toward Pro-Environmental Behaviour and Climate Change Impacts on the Great Barrier Reef." [In English]. *Journal of Environmental Planning and Management* 56, no. 4 (2013): 494-511.
- Vaze, J., and J. Teng. "Future Climate and Runoff Projections across New South Wales, Australia: Results and Practical Applications." [In English]. *Hydrological Processes* 25, no. 1 (2011): 18-35.
- Veland, S., R. Howitt, D. Dominey-Howes, F. Thomalla, and D. Houston. "Procedural Vulnerability: Understanding Environmental Change in a Remote Indigenous Community." [In English]. *Global Environmental Change* 23, no. 1 (2013): 314-26.
- Veldhuizen, L. J. L., S. Tapsuwan, and M. Burton. "Adapting to Climate Change: Are People Willing to Pay or Change?" Paper presented at the 19th International Congress on Modelling and Simulation - Sustaining Our Future: Understanding and Living with Uncertainty, MODSIM2011, Perth, WA, 2011.
- Verdon-Kidd, D., A. Kiem, G. Willgoose, and M. G. Stewart. "East Coast Low Storms and the Pasha Bulker Storm - Lessons Learned Five Years On." Paper presented at the Proceedings of the 34th Hydrology and Water Resources Symposium, HWRS 2012, 2012.
- Verdon-Kidd, D. C., G. R. Hancock, and J. B. Lowry. "A 507-Year Rainfall and Runoff Reconstruction for the Monsoonal North West, Australia Derived from Remote Paleoclimate Archives." *Global and Planetary Change* 158 (2017): 21-35.
- Verdon-Kidd, D. C., and A. S. Kiem. "Quantifying Drought Risk in a Nonstationary Climate." [In English]. *Journal of Hydrometeorology* 11, no. 4 (2010): 1019-31.
- Verschuuren, J., and J. McDonald. "Towards a Legal Framework for Coastal Adaptation: Assessing the First Steps in Europe and Australia." [In English]. *Transnational Environmental Law* 1, no. 2



- (2012): 355-79.
- Vicedo-Cabrera, A. M., F. Sera, Y. Guo, Y. Chung, K. Arbutnott, S. Tong, A. Tobias, *et al.* "A Multi-Country Analysis on Potential Adaptive Mechanisms to Cold and Heat in a Changing Climate." *Environment International* 111 (Dec 18 2018): 239-46.
- Vickery, D., and C. Danese. "Assessing Coastal Vulnerability and Value at Risk: Lessons Learnt from a Local Government Perspective." Paper presented at the Coasts and Ports 2013, Sydney, NSW, 2013.
- Viscarra Rossel, R. A., R. Webster, E. N. Bui, and J. A. Baldock. "Baseline Map of Organic Carbon in Australian Soil to Support National Carbon Accounting and Monitoring under Climate Change." [In English]. *Global Change Biology* 20, no. 9 (Sep 2014): 2953-70.
- Wade, B., P. Dargusch, and A. Griffiths. "Defining Best Practice Carbon Management in an Australian Context." [In English]. *Australasian Journal of Environmental Management* 21, no. 1 (2014): 52-64.
- Wainwright, D. J., D. P. Callaghan, P. Cowell, A. Dougherty, and C. D. Woodroffe. "Probabilistic Coastal Hazard Lines for Risk Based Coastal Assessment." Paper presented at the Coasts and Ports 2013, Sydney, NSW, 2013.
- Walker, R. "Climate Change and Primary Health Care Intervention Framework." [In English]. *Australian Journal of Primary Health* 15, no. 4 (2009): 276-84.
- Walker, R., J. Hassall, S. Chaplin, J. Congues, R. Bajayo, and W. Mason. "Health Promotion Interventions to Address Climate Change Using a Primary Health Care Approach: A Literature Review." *Health promotion journal of Australia : official journal of Australian Association of Health Promotion Professionals* 22 Spec No (2011): S6-12.
- Wallace, J., and D. McJannet. "Climate Change Impacts on the Water Balance of Coastal and Montane Rainforests in Northern Queensland, Australia." [In English]. *Journal of Hydrology* 475 (2012): 84-96.
- Waller, S., and J. Barnett. "The Challenge of Governing Adaptation in Australia." Chap. 5 In *The Adaptive Challenge of Climate Change*, 81-97, 2015.
- Wanders, N., Y. Wada, and H. A. J. Van Lanen. "Global Hydrological Droughts in the 21st Century under a Changing Hydrological Regime." *Earth System Dynamics* 6, no. 1 (2015): 1-15.
- Wang, E., and J. Wang. "Modelling the Performance of Different Wheat Varieties under Changed Climate-Towards Better Adaptation." Paper presented at the 4th International Symposium on Intelligent Information Technology in Agriculture, ISIITA 2007, 2007.
- Wang, X., Y. B. Khoo, and C. H. Wang. "Risk-Based Cost/Benefit Assessment and Decision-Making for Residential Housing Adapting to Increasing Risks under Storm-Tide Inundation Due to Sea Level Rise in Southeast Queensland, Australia." Paper presented at the 11th International Conference on Structural Safety and Reliability, ICOSSAR 2013, New York, NY, 2013.
- Ward, J. K., J. Wall, and S. D. White. "Automate and Motivate: Behaviour-Reliant Building Technology Solutions for Reducing Greenhouse Gas Emissions." [In English]. *Architectural Science Review* 53, no. 1 (2010): 87-94.
- Ward, S., and K. Van Vuuren. "Belonging to the Rainbow Region: Place, Local Media, and the Construction of Civil and Moral Identities Strategic to Climate Change Adaptability." [In English]. *Environmental Communication* 7, no. 1 (2013): 63-69.
- Wardell-Johnson, G., D. Schoeman, T. Schlacher, A. Wardell-Johnson, M. A. Weston, Y. Shimizu, and G. Conroy. "Re-Framing Values for a World Heritage Future: What Type of Icon Will K'gari-Fraser Island Become?". *Australasian Journal of Environmental Management* 22, no. 2 (2015): 124-48.

- Waschka, M., and S. Torok. "Communication of Information for Adaptation." In *Climate Adaptation Futures*, 141-60: John Wiley and Sons, 2013.
- Watson, J. "Practical Precautions, Reasonable Responses: How South Australia's Planning Regime Adapts to the Coastal Impacts of Climate Change." *Environmental and Planning Law Journal* 32, no. 3 (2015): 256-77.
- Watson, J. E. M., T. Iwamura, and N. Butt. "Mapping Vulnerability and Conservation Adaptation Strategies under Climate Change." [In English]. *Nature Climate Change* 3, no. 11 (2013): 989-94.
- Weaver, S. C., and W. K. Reisen. "Present and Future Arboviral Threats." *Antiviral Research* 85, no. 2 (Feb 2010): 328-45.
- Webb, J. A., M. J. Stewardson, Y. E. Chee, E. S. G. Schreiber, A. K. Sharpe, and M. C. Jensz. "Negotiating the Turbulent Boundary: The Challenges of Building a Science-management Collaboration for Landscape-Scale Monitoring of Environmental Flows." [In English]. *Marine and Freshwater Research* 61, no. 7 (2010): 798-807.
- Webb, L. B., P. H. Whetton, and E. W. R. Barlow. "Climate Change and Winegrape Quality in Australia." [In English]. *Climate Research* 36, no. 2 (2008): 99-111.
- Webb, L. B., P. H. Whetton, J. Bhend, R. Darbyshire, P. R. Briggs, and E. W. R. Barlow. "Earlier Wine-Grape Ripening Driven by Climatic Warming and Drying and Management Practices." [In English]. *Nature Climate Change* 2, no. 4 (2012): 259-64.
- Webb, N. P., C. J. Stokes, and J. C. Scanlan. "Interacting Effects of Vegetation, Soils and Management on the Sensitivity of Australian Savanna Rangelands to Climate Change." [In English]. *Climatic Change* 112, no. 3-4 (2012): 925-43.
- Webb, R. J., R. McKellar, and R. Kay. "Climate Change Adaptation in Australia: Experience, Challenges and Capability Development." [In English]. *Australasian Journal of Environmental Management* 20, no. 4 (2013): 320-37.
- Weber, L. C., J. Vanderwal, S. Schmidt, W. J. F. McDonald, and L. P. Shoo. "Patterns of Rain Forest Plant Endemism in Subtropical Australia Relate to Stable Mesic Refugia and Species Dispersal Limitations." [In English]. *Journal of Biogeography* 41, no. 2 (2014): 222-38.
- Weeks, A. R., J. Stoklosa, and A. A. Hoffmann. "Conservation of Genetic Uniqueness of Populations May Increase Extinction Likelihood of Endangered Species: The Case of Australian Mammals." *Frontiers in Zoology* 13, no. 1 (2016): 31.
- Weldegiorgis, F. S., and D. M. Franks. "Social Dimensions of Energy Supply Alternatives in Steelmaking: Comparison of Biomass and Coal Production Scenarios in Australia." [In English]. *Journal of Cleaner Production* 84, no. 1 (2014): 281-88.
- Wellstead, A., M. Howlett, and J. Rayner. "Structural-Functionalism Redux: Adaptation to Climate Change and the Challenge of a Science-Driven Policy Agenda." *Critical Policy Studies* 11, no. 4 (2017): 391-410.
- Wenger, C. "Better Use and Management of Levees: Reducing Flood Risk in a Changing Climate." *Environmental Reviews* 23, no. 2 (2015): 240-55.
- Wernberg, T., M. S. Thomsen, F. Tuya, G. A. Kendrick, P. A. Staehr, and B. D. Toohey. "Decreasing Resilience of Kelp Beds Along a Latitudinal Temperature Gradient: Potential Implications for a Warmer Future." [In English]. *Ecology Letters* 13, no. 6 (2010): 685-94.
- Westerhoff, L., E. C. H. Kesitalo, H. McKay, J. Wolf, D. Ellison, I. Botetzagias, and B. Reyssset. "Planned Adaptation Measures in Industrialised Countries: A Comparison of Select Countries within and Outside the Eu." In *Developing Adaptation Policy and Practice in Europe: Multi-Level Governance of Climate Change*, 271-338, 2010.

- Whalley, R. D. B., I. H. Chivers, and C. M. Waters. "Revegetation with Australian Native Grasses - a Reassessment of the Importance of Using Local Provenances." [In English]. *Rangeland Journal* 35, no. 2 (2013): 155-66.
- Whan, K., L. V. Alexander, A. Imielska, S. McGree, D. Jones, E. Ene, S. Finaulahi, *et al.* "Trends and Variability of Temperature Extremes in the Tropical Western Pacific." [In English]. *International Journal of Climatology* 34, no. 8 (2014): 2585-603.
- Wheeler, S. A., A. Loch, and J. Edwards. "The Role of Water Markets in Helping Irrigators Adapt to Water Scarcity in the Murray-Darling Basin, Australia." In *Applied Studies in Climate Adaptation*, 166-74, 2014.
- Whelan, R. J., J. Sumner, C. Mooney, and D. Farrier. "A State Is Not an Island: Conserving Evolutionary Potential in the Face of Climate Change by Listing Populations under Current Threatened Species Legislation." [In English]. *Australasian Journal of Natural Resources Law and Policy* 13, no. 1 (2009): 137-60.
- Whitehead, I. "Climate Change Law in Southeast Asia: Risk, Regulation and Regional Innovation." [In English]. *Asia Pacific Journal of Environmental Law* 16, no. 1 (2013): 141-52.
- Whittaker, J., J. Handmer, and D. J. Karoly. "After 'Black Saturday': Adapting to Bushfires in a Changing Climate." In *Natural Disasters and Adaptation to Climate Change*, 75-86: Cambridge University Press, 2008.
- Wickramasinghe, A., and H. R. Gamage. "Competing for Sustainability within Carbon Constrained World: A Strategic Climate Change Planning Framework." [In English]. *International Journal of Innovation and Sustainable Development* 7, no. 1 (2013): 61-76.
- Wijsekara, H., N. S. Bolan, R. Thangavel, B. Seshadri, A. Surapaneni, C. Saint, C. Hetherington, P. Matthews, and M. Vithanage. "The Impact of Biosolids Application on Organic Carbon and Carbon Dioxide Fluxes in Soil." *Chemosphere* 189 (Dec 2017): 565-73.
- Wilby, R. L., and R. Keenan. "Adapting to Flood Risk under Climate Change." [In English]. *Progress in Physical Geography* 36, no. 3 (2012): 348-78.
- Wilensky, M. "Climate Change in the Courts: An Assessment of Non-U.S. Climate Litigation." *Duke Environmental Law and Policy Forum* 26, no. 1 (2015): 131-79.
- Wilkinson, S. "Building Approval Data and the Quantification of Sustainability over Time: A Case Study of Australia and England." *Structural Survey* 33, no. 2 (2015): 92-108.
- Wilkinson, S. J. "Office Building Adaptation and the Growing Significance of Environmental Attributes." [In English]. *Journal of Corporate Real Estate* 16, no. 4 (2014): 252-65.
- Wilkinson, S. J., K. James, and R. Reed. "Using Building Adaptation to Deliver Sustainability in Australia." [In English]. *Structural Survey* 27, no. 1 (2009): 46-61.
- Williams, S., P. Bi, J. Newbury, G. Robinson, D. Pisaniello, A. Saniotis, and A. Hansen. "Extreme Heat and Health: Perspectives from Health Service Providers in Rural and Remote Communities in South Australia." [In English]. *International Journal of Environmental Research and Public Health* 10, no. 11 (2013): 5565-83.
- Wilson, E. J., M. G. Morgan, J. Apt, M. Bonner, C. Bunting, J. Gode, R. S. Haszeldine, *et al.* "Regulating the Geological Sequestration of CO<sub>2</sub>." *Environmental Science and Technology* 42, no. 8 (2008): 2718-22.
- Wilson, N. C., and N. Saintilan. "Growth of the Mangrove Species *Rhizophora Stylosa* Griff. At Its Southern Latitudinal Limit in Eastern Australia." [In English]. *Aquatic Botany* 101 (2012): 8-17.
- Wilson, R. F., and S. M. Turton. "The Impact of Climate Change on Reef-Based Tourism in Cairns, Australia-Adaptation and Response Strategies for a Highly Vulnerable Destination." In *Disappearing Destinations: Climate Change and Future Challenges for Coastal Tourism*, 233-

- 53: CABI Publishing, 2010.
- Woldendorp, G., M. J. Hill, R. Doran, and M. C. Ball. "Frost in a Future Climate: Modelling Interactive Effects of Warmer Temperatures and Rising Atmospheric [Co<sub>2</sub>] on the Incidence and Severity of Frost Damage in a Temperate Evergreen (*Eucalyptus Pauciflora*)." [In English]. *Global Change Biology* 14, no. 2 (2008): 294-308.
- Wolfe, K., S. A. Dworjanyn, and M. Byrne. "Effects of Ocean Warming and Acidification on Survival, Growth and Skeletal Development in the Early Benthic Juvenile Sea Urchin (*Heliocidaris Erythrogramma*)." [In English]. *Global Change Biology* 19, no. 9 (2013): 2698-707.
- Wood, S. W., Q. Hua, K. J. Allen, and D. M. J. S. Bowman. "Age and Growth of a Fire Prone Tasmanian Temperate Old-Growth Forest Stand Dominated by *Eucalyptus Regnans*, the World's Tallest Angiosperm." [In English]. *Forest Ecology and Management* 260, no. 4 (2010): 438-47.
- Woodruff, R. E., T. McMichael, C. Butler, and S. Hales. "Action on Climate Change: The Health Risks of Procrastinating." [In English]. *Australian and New Zealand Journal of Public Health* 30, no. 6 (2006): 567-71.
- Wooldridge, S., T. Done, R. Berkelmans, R. Jones, and P. Marshall. "Precursors for Resilience in Coral Communities in a Warming Climate: A Belief Network Approach." [In English]. *Marine Ecology Progress Series* 295 (2005): 157-69.
- Wooldridge, S. A., and T. J. Done. "Improved Water Quality Can Ameliorate Effects of Climate Change on Corals." [In English]. *Ecological Applications* 19, no. 6 (2009): 1492-99.
- Woolf, M., J. Schneider, and M. Hazelwood. "Extreme Event Risk and Climate Change Adaptation: Improving the Knowledge Base and Building Capacity." In *Climate Adaptation Futures*, 351-61: John Wiley and Sons, 2013.
- Woolgar, L., S. Trocini, and N. Mitchell. "Key Parameters Describing Temperature-Dependent Sex Determination in the Southernmost Population of Loggerhead Sea Turtles." [In English]. *Journal of Experimental Marine Biology and Ecology* 449 (2013): 77-84.
- Worthington, T. "A Green Computing Professional Education Course Online: Designing and Delivering a Course in Ict Sustainability Using Internet and Ebooks." Paper presented at the 2012 7th International Conference on Computer Science and Education, ICCSE 2012, Melbourne, VIC, 2012.
- Wright, C., and D. Nyberg. "Creative Self-Destruction: Corporate Responses to Climate Change as Political Myths." [In English]. *Environmental Politics* 23, no. 2 (2014): 205-23.
- Xiang, J., P. Bi, D. Pisaniello, and A. Hansen. "The Impact of Heatwaves on Workers[U+05f3] Health and Safety in Adelaide, South Australia." [In English]. *Environmental Research* 133 (2014): 90-95.
- Xiang, J., P. Bi, D. Pisaniello, A. Hansen, and T. Sullivan. "Association between High Temperature and Work-Related Injuries in Adelaide, South Australia, 2001-2010." [In English]. *Occupational and Environmental Medicine* 71, no. 4 (2014): 246-52.
- Xiang, J., A. Hansen, D. Pisaniello, and P. Bi. "Perceptions of Workplace Heat Exposure and Controls among Occupational Hygienists and Relevant Specialists in Australia." *PLoS ONE* 10, no. 8 (2015): e0135040.
- Xie, S., L. M. Romero, Z. W. Htut, and T. J. McWhorter. "Stress Responses to Heat Exposure in Three Species of Australian Desert Birds." *Physiological and Biochemical Zoology* 90, no. 3 (May/Jun 2017): 348-58.
- Yang, Y., D. L. Liu, M. R. Anwar, H. Zuo, and Y. Yang. "Impact of Future Climate Change on Wheat Production in Relation to Plant-Available Water Capacity in a Semiarid Environment." [In English]. *Theoretical and Applied Climatology* 115, no. 3-4 (2014): 391-410.

- Yates, C. J., J. Elith, A. M. Latimer, D. Le Maitre, G. F. Midgley, F. M. Schurr, and A. G. West. "Projecting Climate Change Impacts on Species Distributions in Megadiverse South African Cape and Southwest Australian Floristic Regions: Opportunities and Challenges." [In English]. *Austral Ecology* 35, no. 4 (2010): 374-91.
- Yihdego, Y., J. Webb, and P. Leahy. "Modelling Water and Salt Balances in a Deep, Groundwater-Throughflow Lake—Lake Purrumbete, Southeastern Australia." *Hydrological Sciences Journal* 61, no. 1 (2016): 186-99.
- Yihdego, Y., J. A. Webb, and P. Leahy. "Modelling of Lake Level under Climate Change Conditions: Lake Purrumbete in Southeastern Australia." [In English]. *Environmental Earth Sciences* (2014).
- Yousuf, F., A. J. Carnegie, R. A. Bedding, R. Bashford, H. I. Nicol, and G. M. Gurr. "Effect of Temperature on Woodwasp (*Sirex Noctilio* F.) Development and Parasitism by the Entomopathogenic Nematode, *Deladenus Siricidicola*." [In English]. *Biological Control* 79 (2014): 67-74.
- Yu, W., P. Dale, L. Turner, and S. Tong. "Projecting the Impact of Climate Change on the Transmission of Ross River Virus: Methodological Challenges and Research Needs." [In English]. *Epidemiology and Infection* 142, no. 10 (2014): 2013-23.
- Zampieri, M., and P. Lionello. "Simple Statistical Approach for Computing Land Cover Types and Potential Natural Vegetation." *Climate Research* 41, no. 3 (2010): 205-20.
- Zander, K. K., W. J. W. Botzen, E. Oppermann, T. Kjellstrom, and S. T. Garnett. "Heat Stress Causes Substantial Labour Productivity Loss in Australia." *Nature Climate Change* 5, no. 7 (2015): 647-51.
- Zanolla, M., M. Altamirano, R. Carmona, J. De La Rosa, A. Sherwood, and N. Andreakis. "Photosynthetic Plasticity of the Genus *Asparagopsis* (Bonnemaisoniales, Rhodophyta) in Response to Temperature: Implications for Invasiveness." [In English]. *Biological Invasions* (2014).
- Zhang, Z. Y., S. Cashins, A. Philips, and C. P. Burridge. "Significant Population Genetic Structuring but a Lack of Phylogeographic Structuring in the Endemic Tasmanian Tree Frog (*Litoria Burrowsae*)." [In English]. *Australian Journal of Zoology* 62, no. 3 (2014): 238-45.
- Zheng, B., S. C. Chapman, J. T. Christopher, T. M. Frederiks, and K. Chenu. "Frost Trends and Their Estimated Impact on Yield in the Australian Wheatbelt." *Journal of Experimental Botany* 66, no. 12 (Jun 2015): 3611-23.
- Zheng, B., K. Chenu, M. Fernanda Dreccer, and S. C. Chapman. "Breeding for the Future: What Are the Potential Impacts of Future Frost and Heat Events on Sowing and Flowering Time Requirements for Australian Bread Wheat (*Triticum Aestivum*) Varieties?" [In English]. *Global Change Biology* 18, no. 9 (2012): 2899-914.
- Zhu, Q., X. Yang, and Q. Yu. "Climate Change Impact on Bushfire Risk in New South Wales, Australia." Paper presented at the International Geoscience and Remote Sensing Symposium (IGARSS), 2015.
